# Supplementary material for: Evidence for late Pleistocene origin of Astyanax mexicanus cavefish
Source: PubMed Central journal article supplement (PMC5905186; doi:10.1186/s12862-018-1156-7), 2018-04-18

## Additional Information for

### **Evidence of late Pleistocene origin of *Astyanax mexicanus* cavefish**

Julien Fumey<sup>1,2</sup>, H  l  ne Hinaux<sup>3</sup>, C  line Noirot<sup>4</sup>, Claude Thermes<sup>2</sup>, Sylvie R  taux<sup>3</sup> and Didier Casane<sup>1,5,\*</sup>

<sup>1</sup>   volution, G  nomes, Comportement,   cologie. CNRS, IRD, Univ Paris-Sud. Universit   Paris-Saclay. F-91198 Gif-sur-Yvette, France.

<sup>2</sup> Institute for Integrative Biology of the Cell (I2BC), CEA, CNRS, Universit   Paris-Sud, UMR 9198, FRC 3115, Avenue de la Terrasse, B  timent 24, Gif-sur-Yvette, Paris F-91198, France.

<sup>3</sup> DECA group, Paris-Saclay Institute of Neuroscience, UMR 9197, CNRS, Gif sur Yvette, France.

<sup>4</sup> Plateforme Bioinformatique Toulouse, Midi-Pyr  n  es, UBIA, INRA, Auzeville Castanet-Tolosan, France

<sup>5</sup> Universit   Paris Diderot, Sorbonne Paris Cit  , France.

\* Corresponding author:

Didier Casane

Laboratoire   volution, G  nomes, Comportement,   cologie, UMR 9191 CNRS, 1 avenue de la Terrasse, 91198 Gif sur Yvette, France.

Tel: +33169823759

Email: Didier.Casane@egce.cnrs-gif.fr

## **Figure S1 to S26**

Distribution of allele frequencies at 26 locus in 15 populations studied by Bradic et al. (2012)

See Figure 1 for the geographic distribution of the populations.

Four groups of surface populations (S1, S2, S3, S4)

Three “new” cave populations (N1: Molino, N2: Caballo Moro, N3: Subterráneo)

Eight “old” cave populations (O1: Pachón, O2: Yerbaniz, O3: Japonés, O4: Arroyo, O5: Tinaja, O6: Curva, O7: Toro, O8: Chica)

For each population, the first, second third and fourth most frequent allele are respectively colored in red, orange, yellow and green. If the frequency is below 10%, the allele is colored in black.

For each population it is also indicated the number of allele scored, the number of different alleles (N) and the effective number of allele ( $N_e$ ).

Figure S1

Locus A13e5 ; size range : 220 – 296

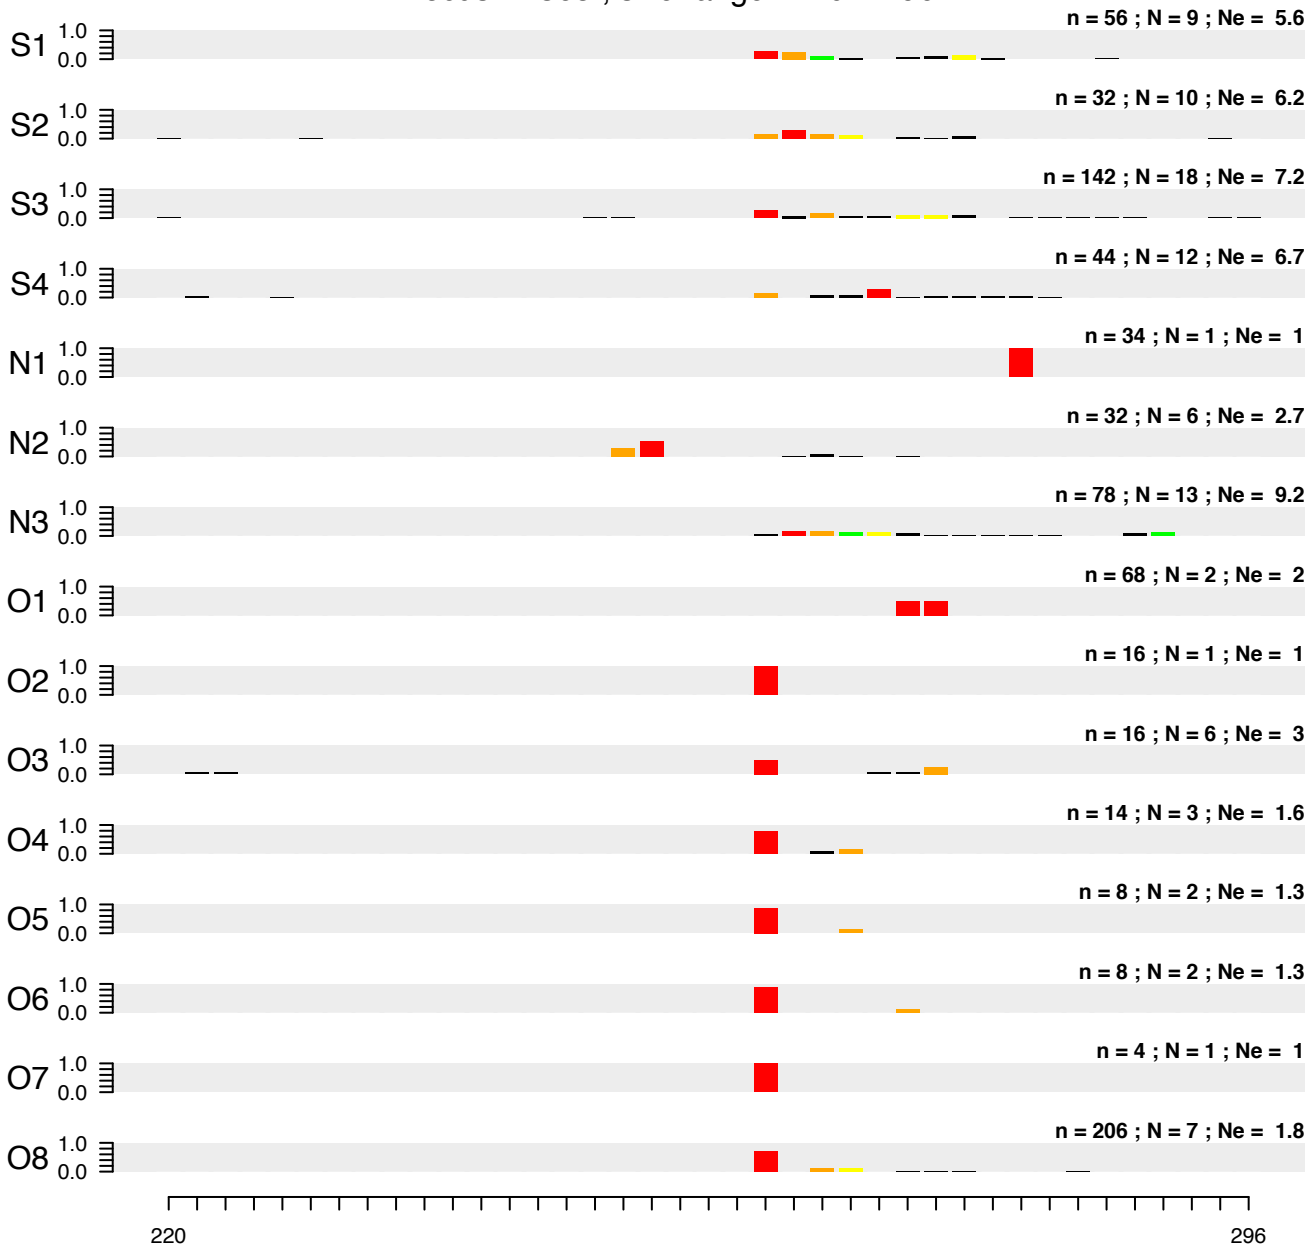

Figure S2

Locus Hc5 ; size range : 150 – 200

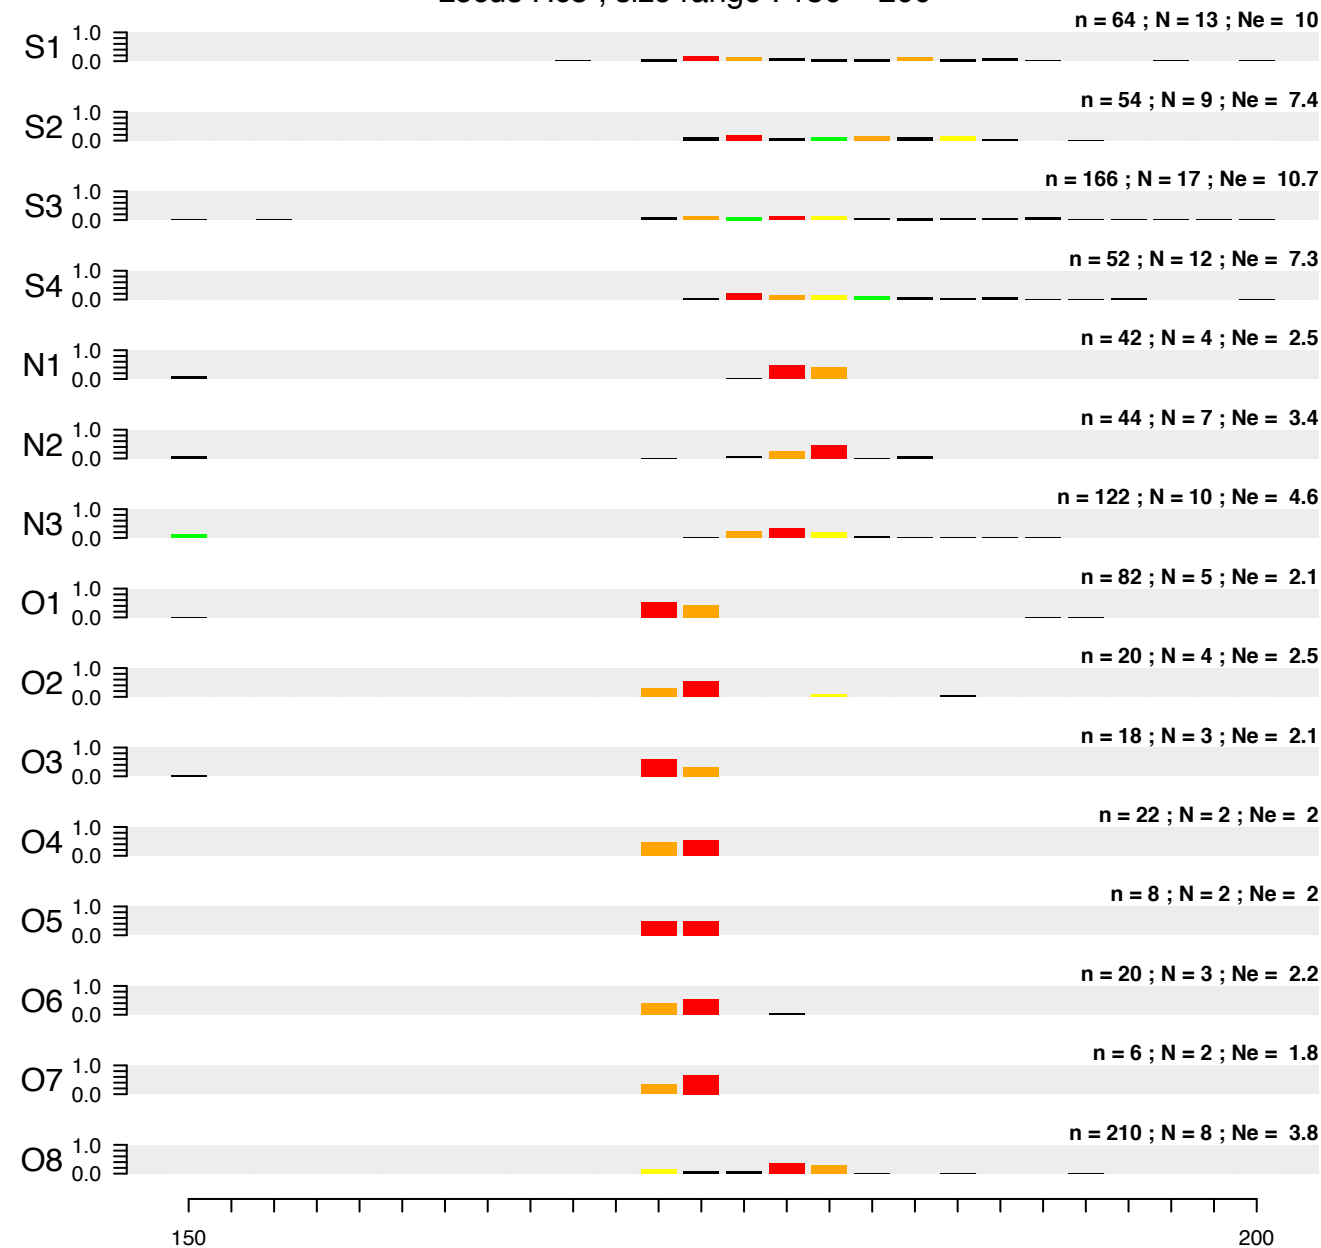

Figure S3

Locus Vf9 ; size range : 290 – 314

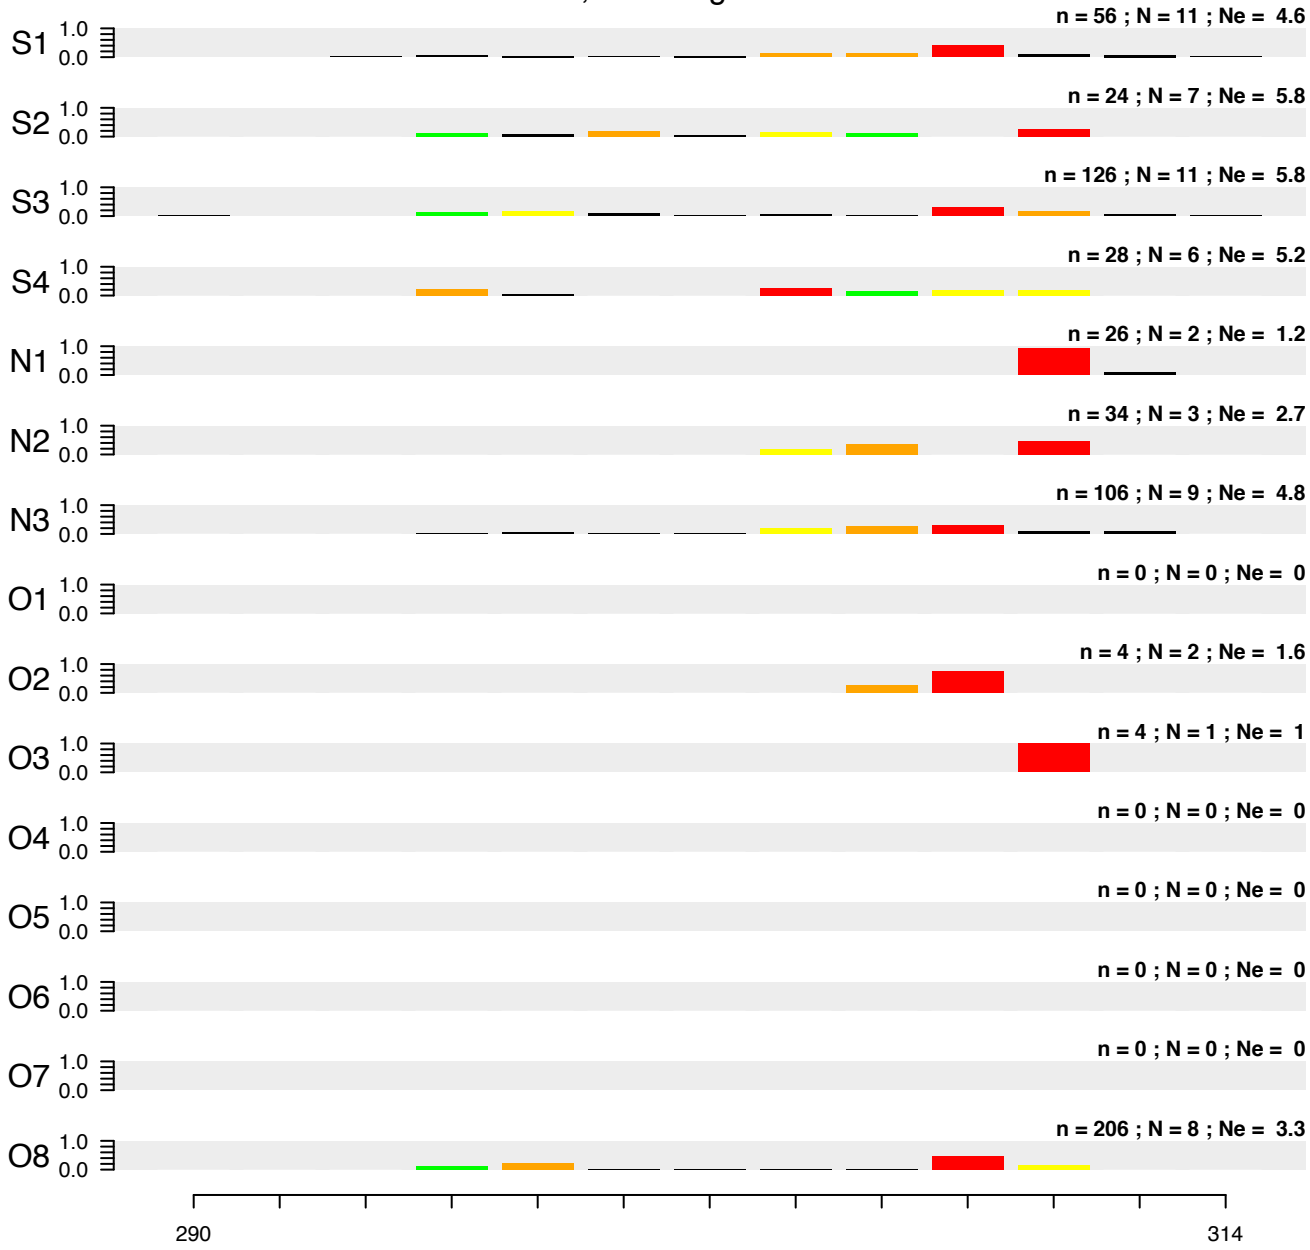

Figure S4

Locus Ra8 ; size range : 136 – 180

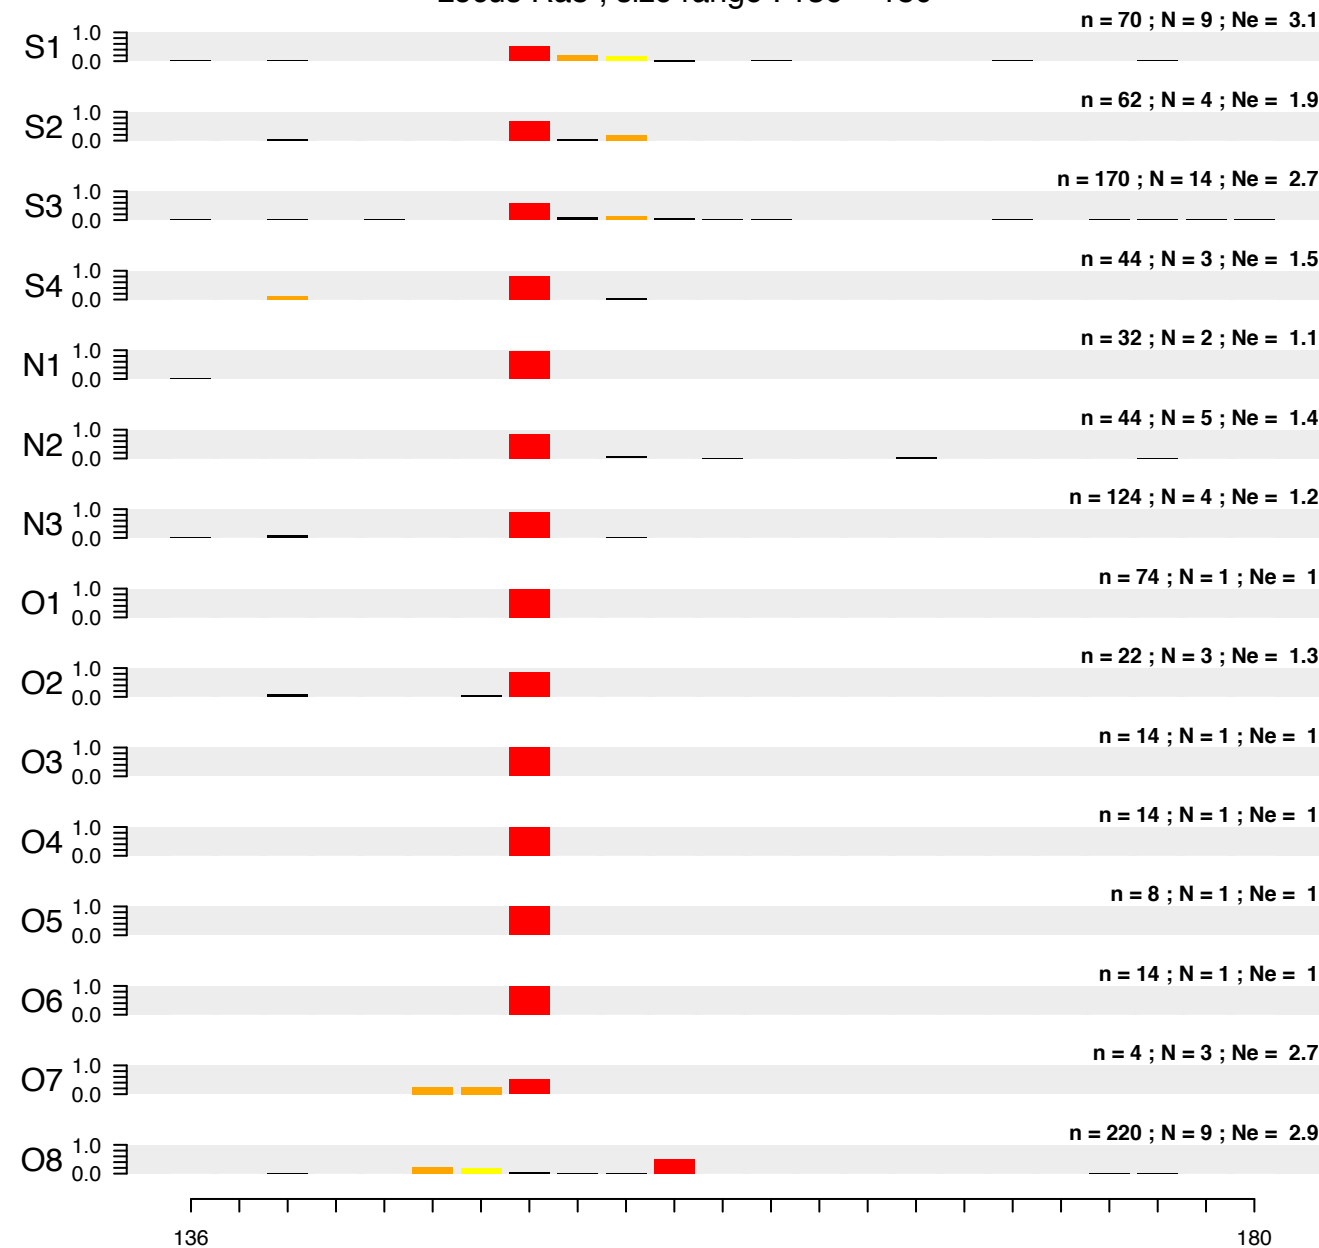

Figure S5

Locus Xa3 ; size range : 202 – 238

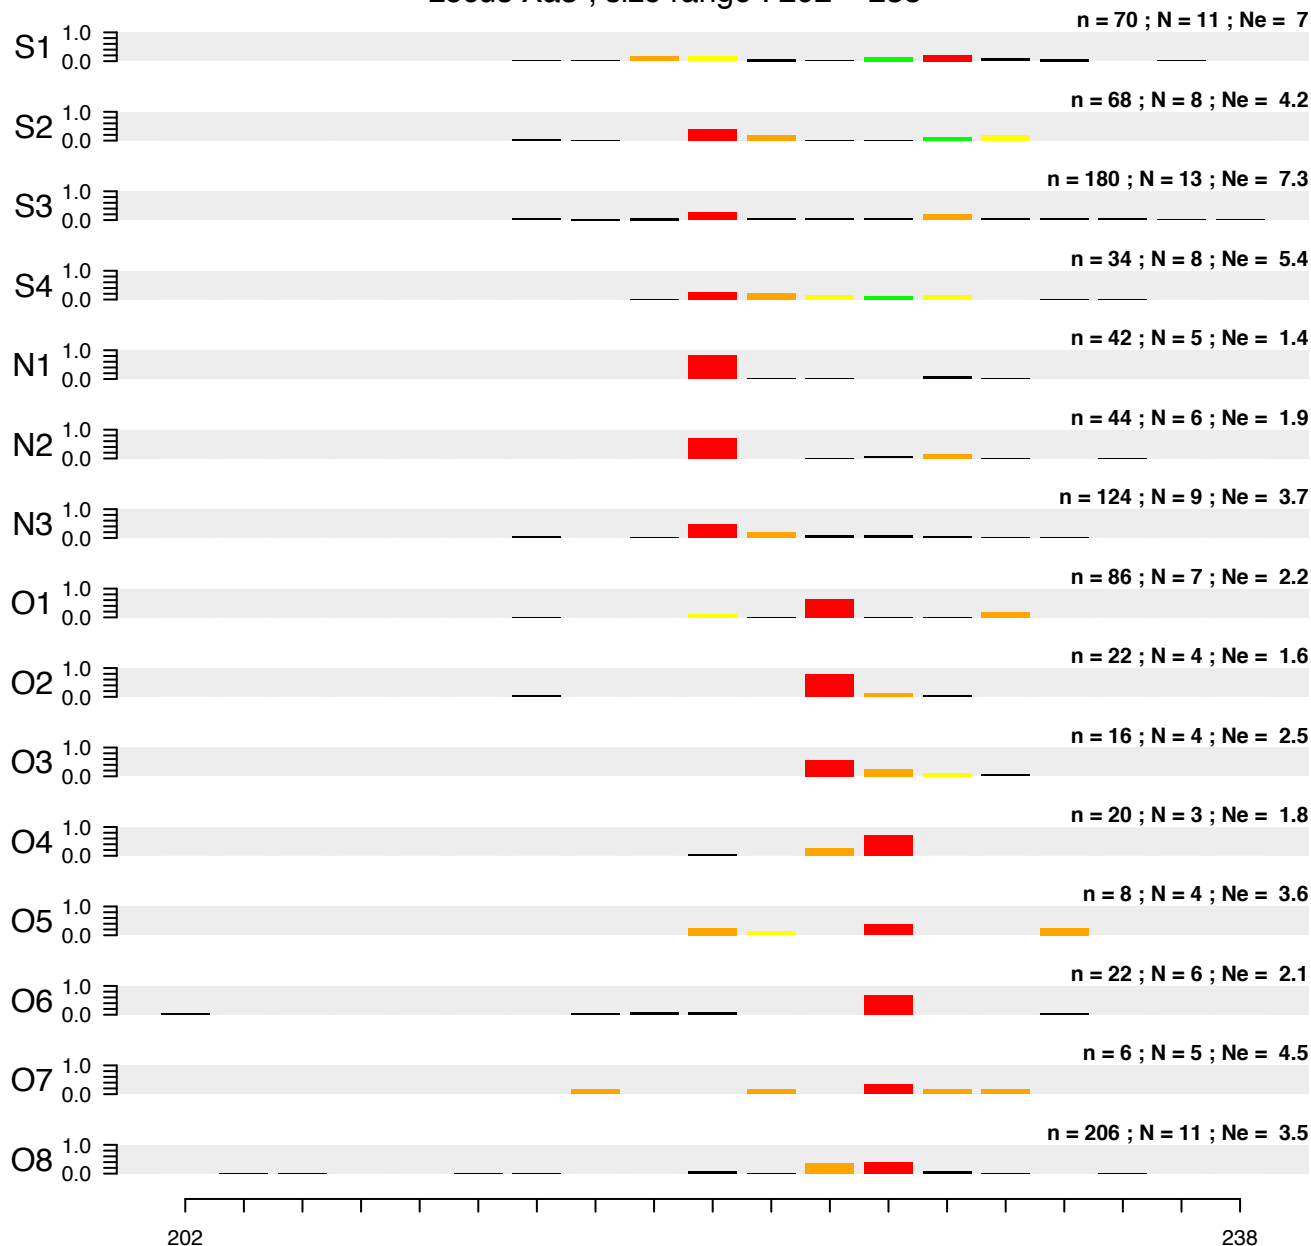

Figure S6

Locus lb1 ; size range : 224 – 340

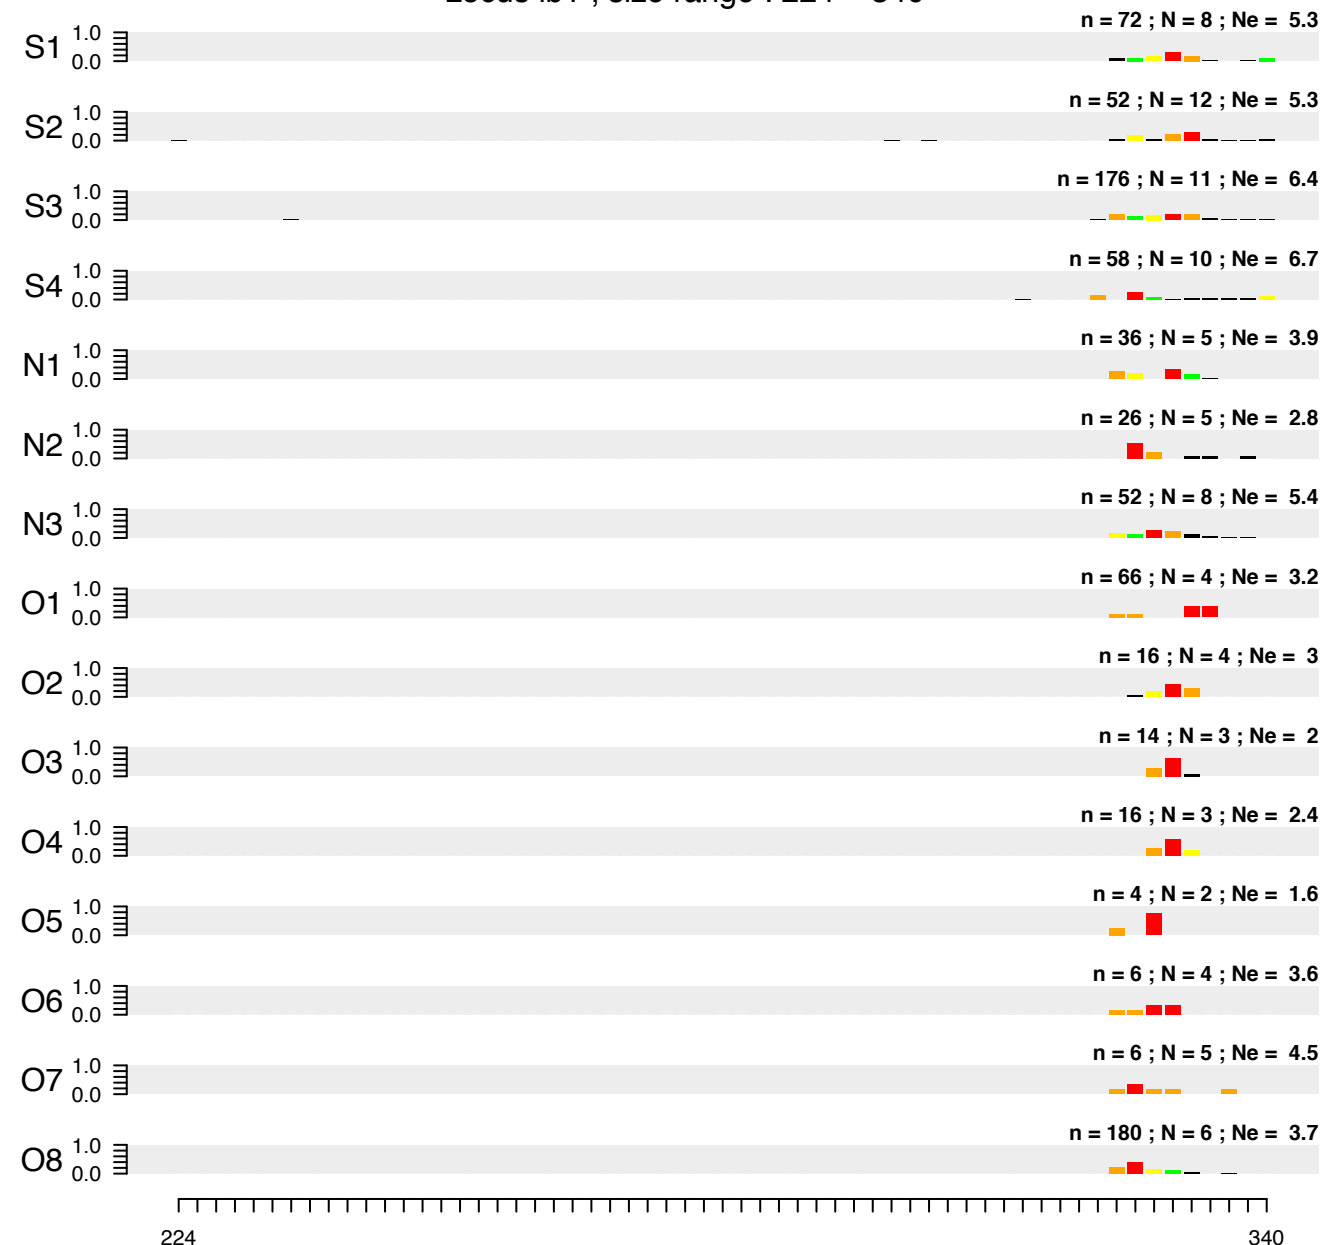



Figure S7

Locus A13f8 ; size range : 104 – 178

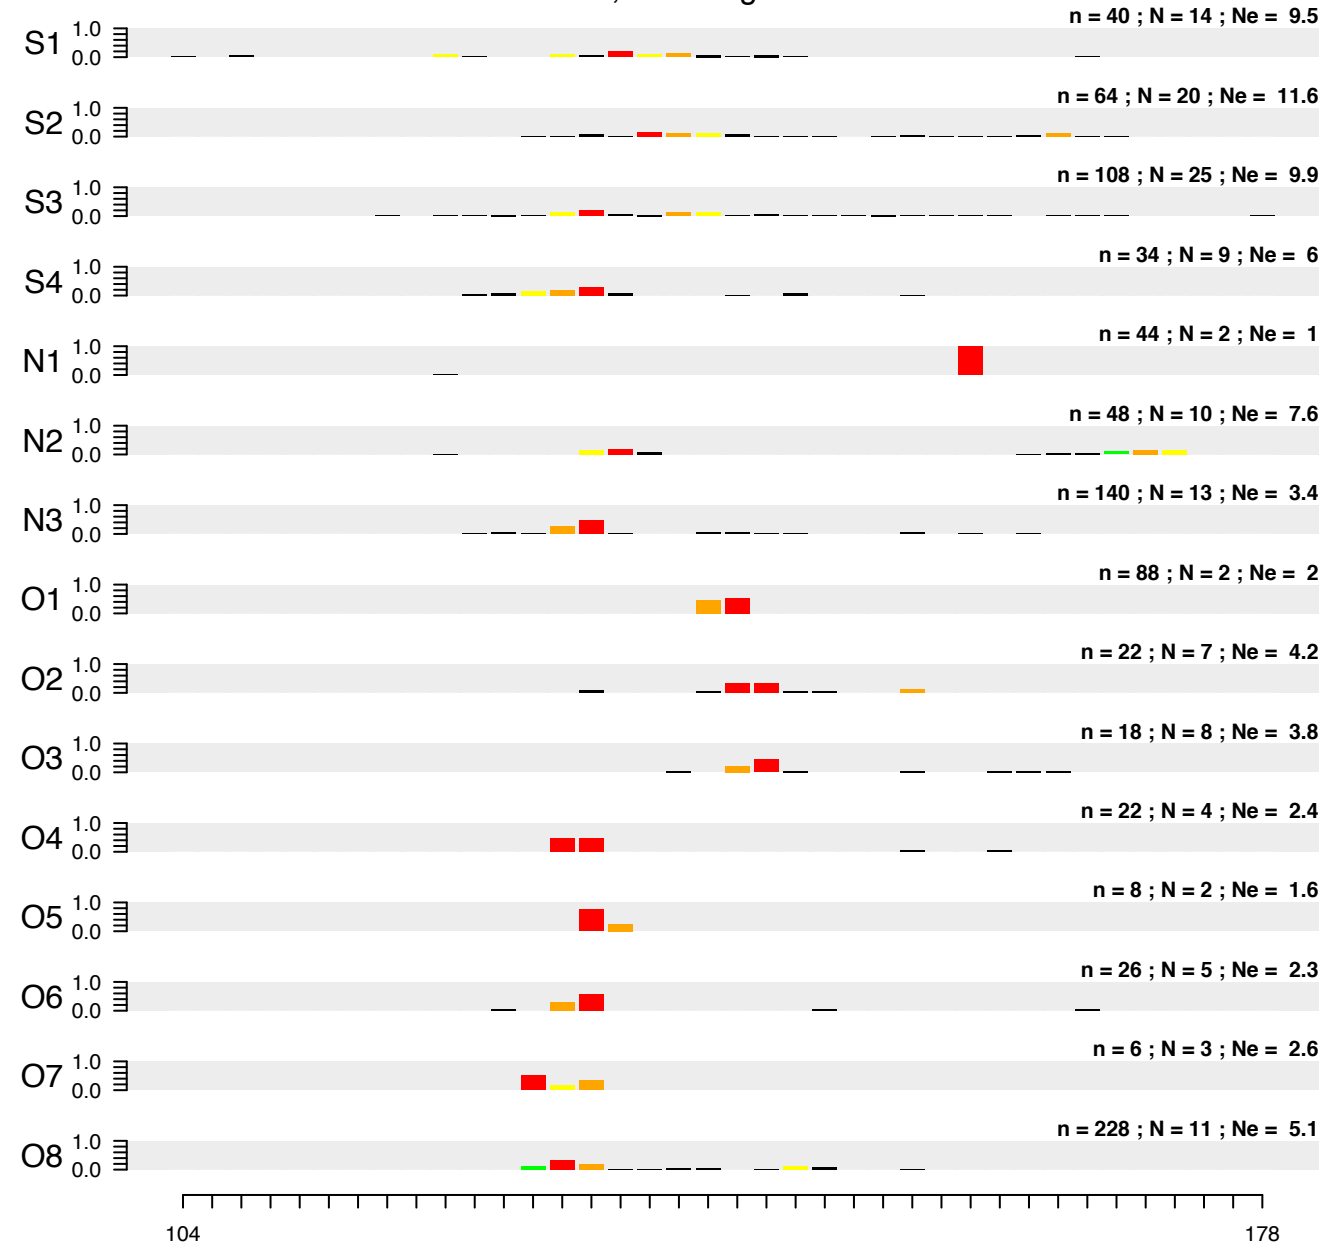

Figure S8

Locus A14d12 ; size range : 262 – 306

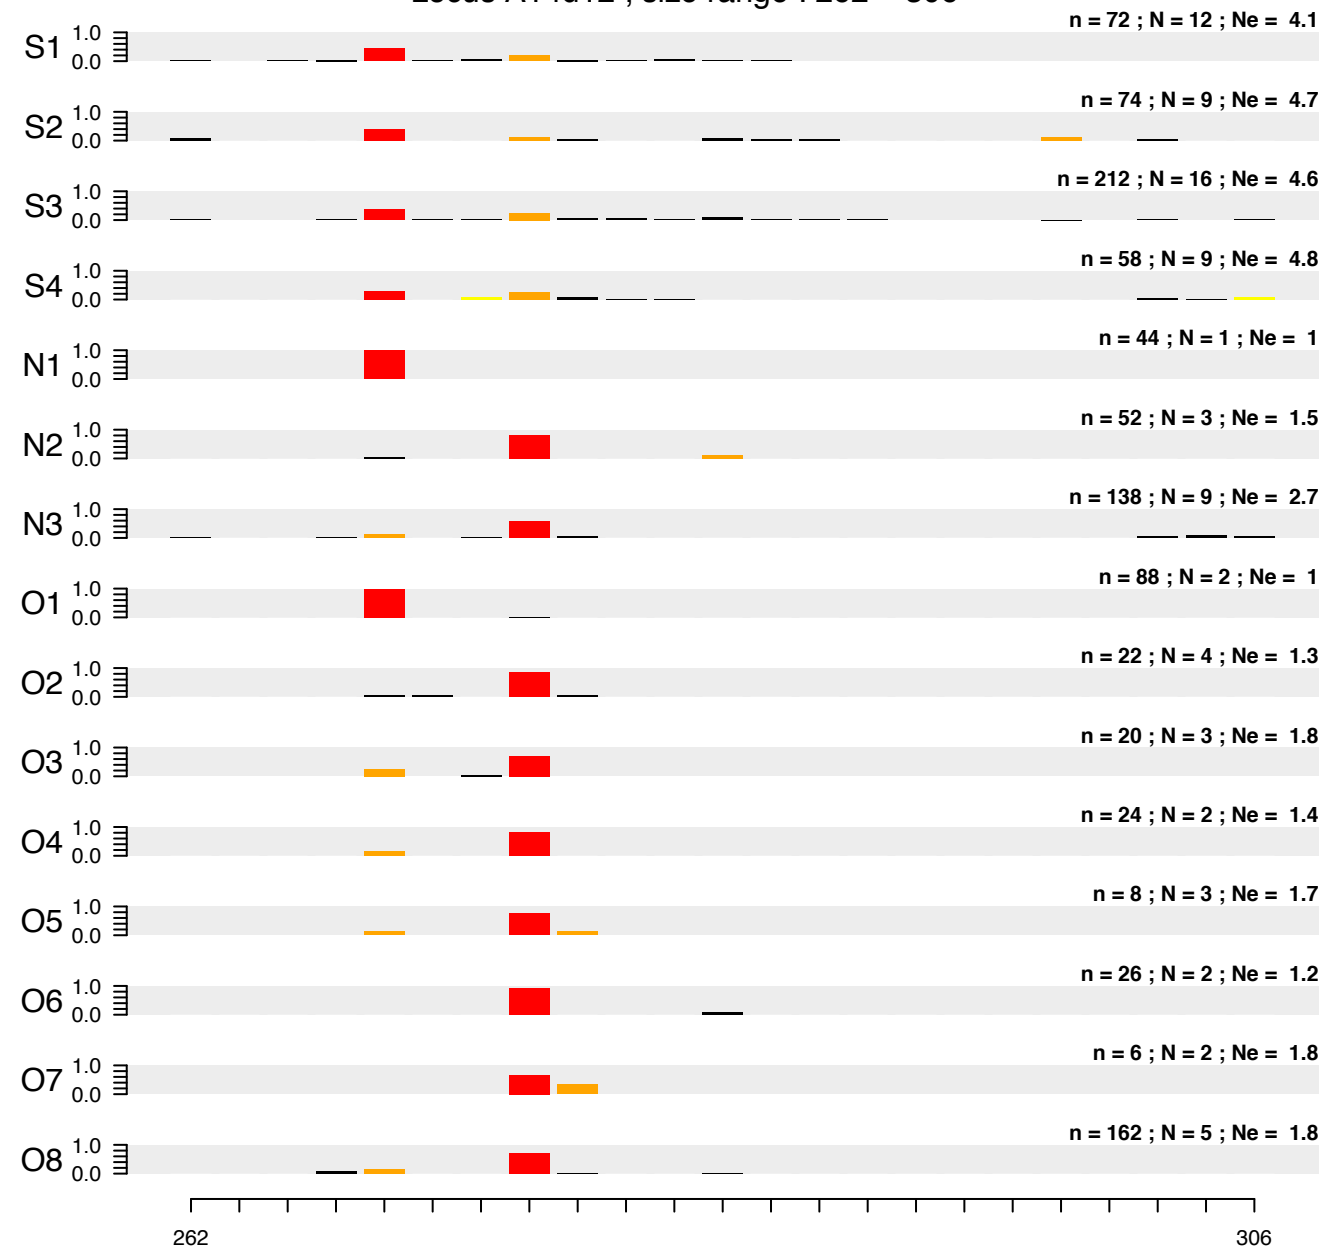

Figure S9

Locus a19c8 ; size range : 200 – 248

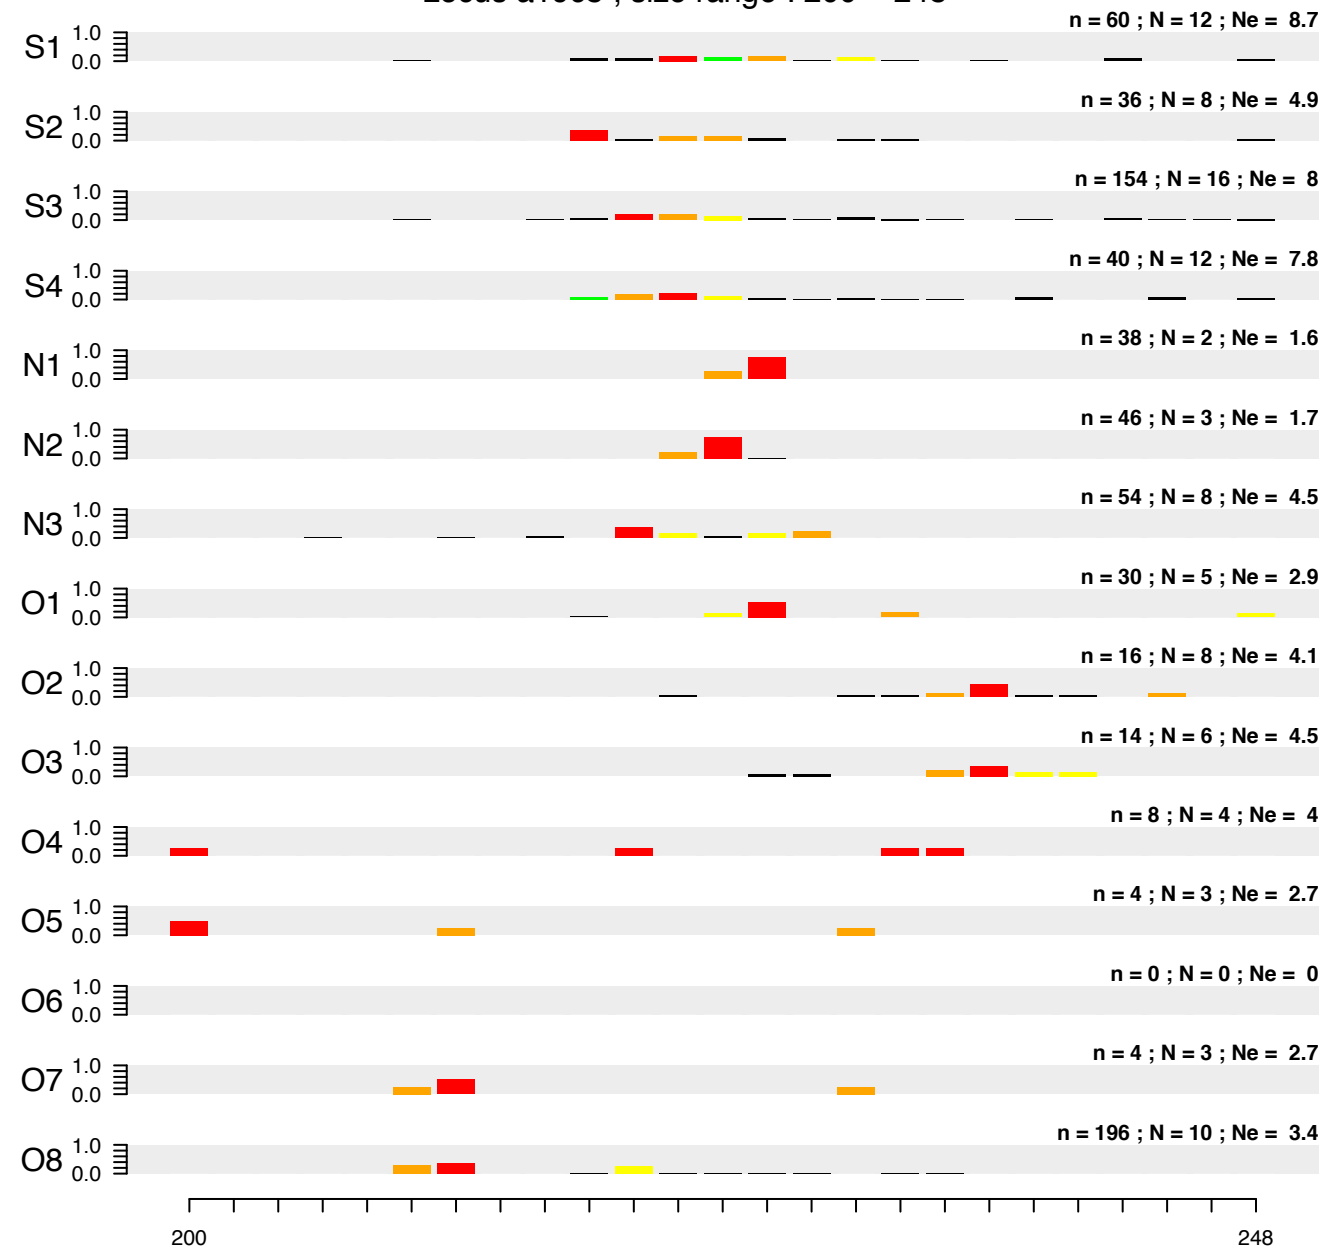

Figure S10

Locus a14d8 ; size range : 126 – 170

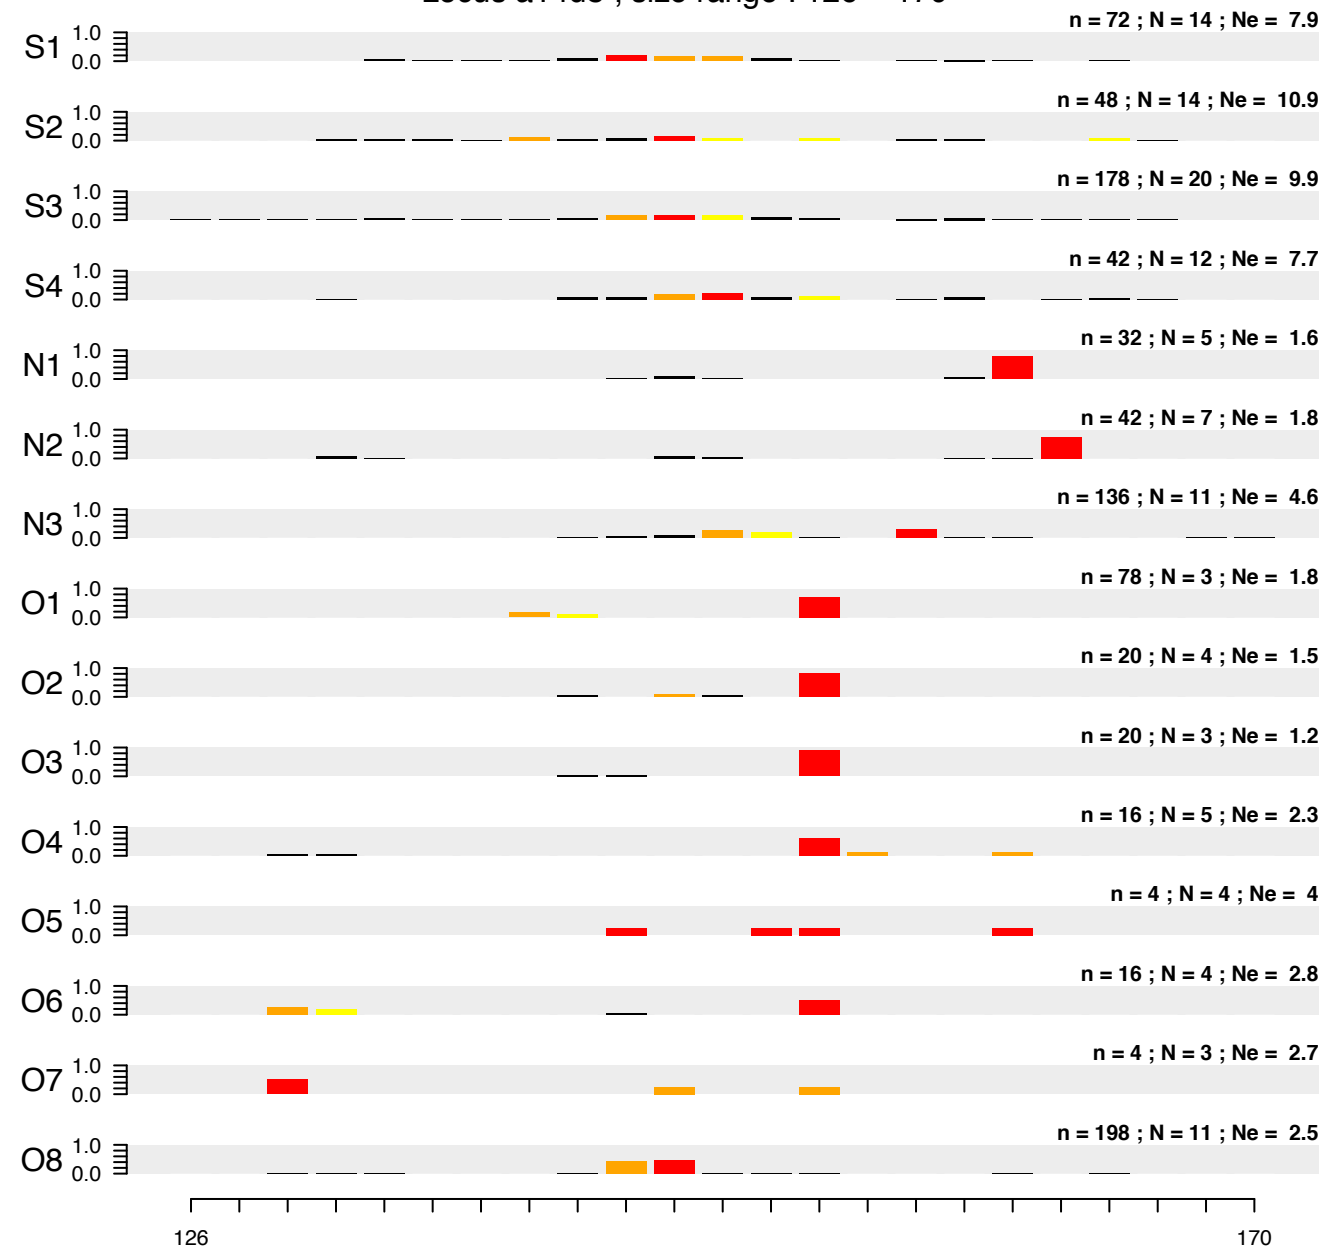

Figure S11

Locus mf4 ; size range : 258 – 288

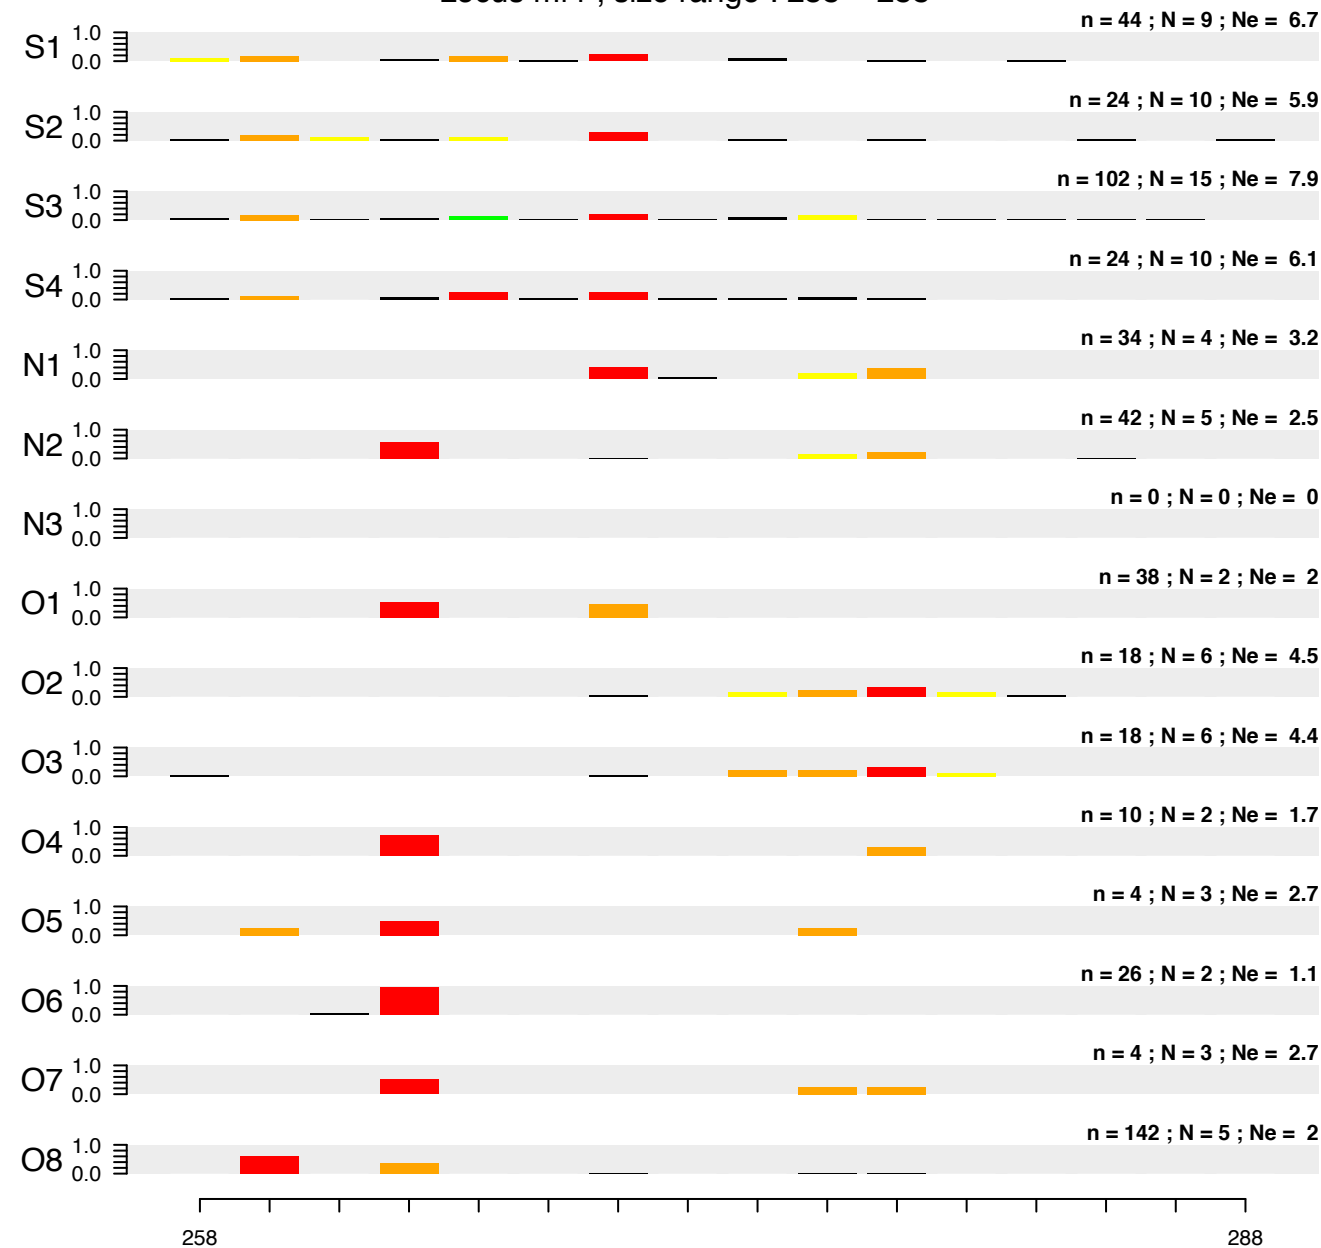

Figure S12

Locus Vf3 ; size range : 202 – 248

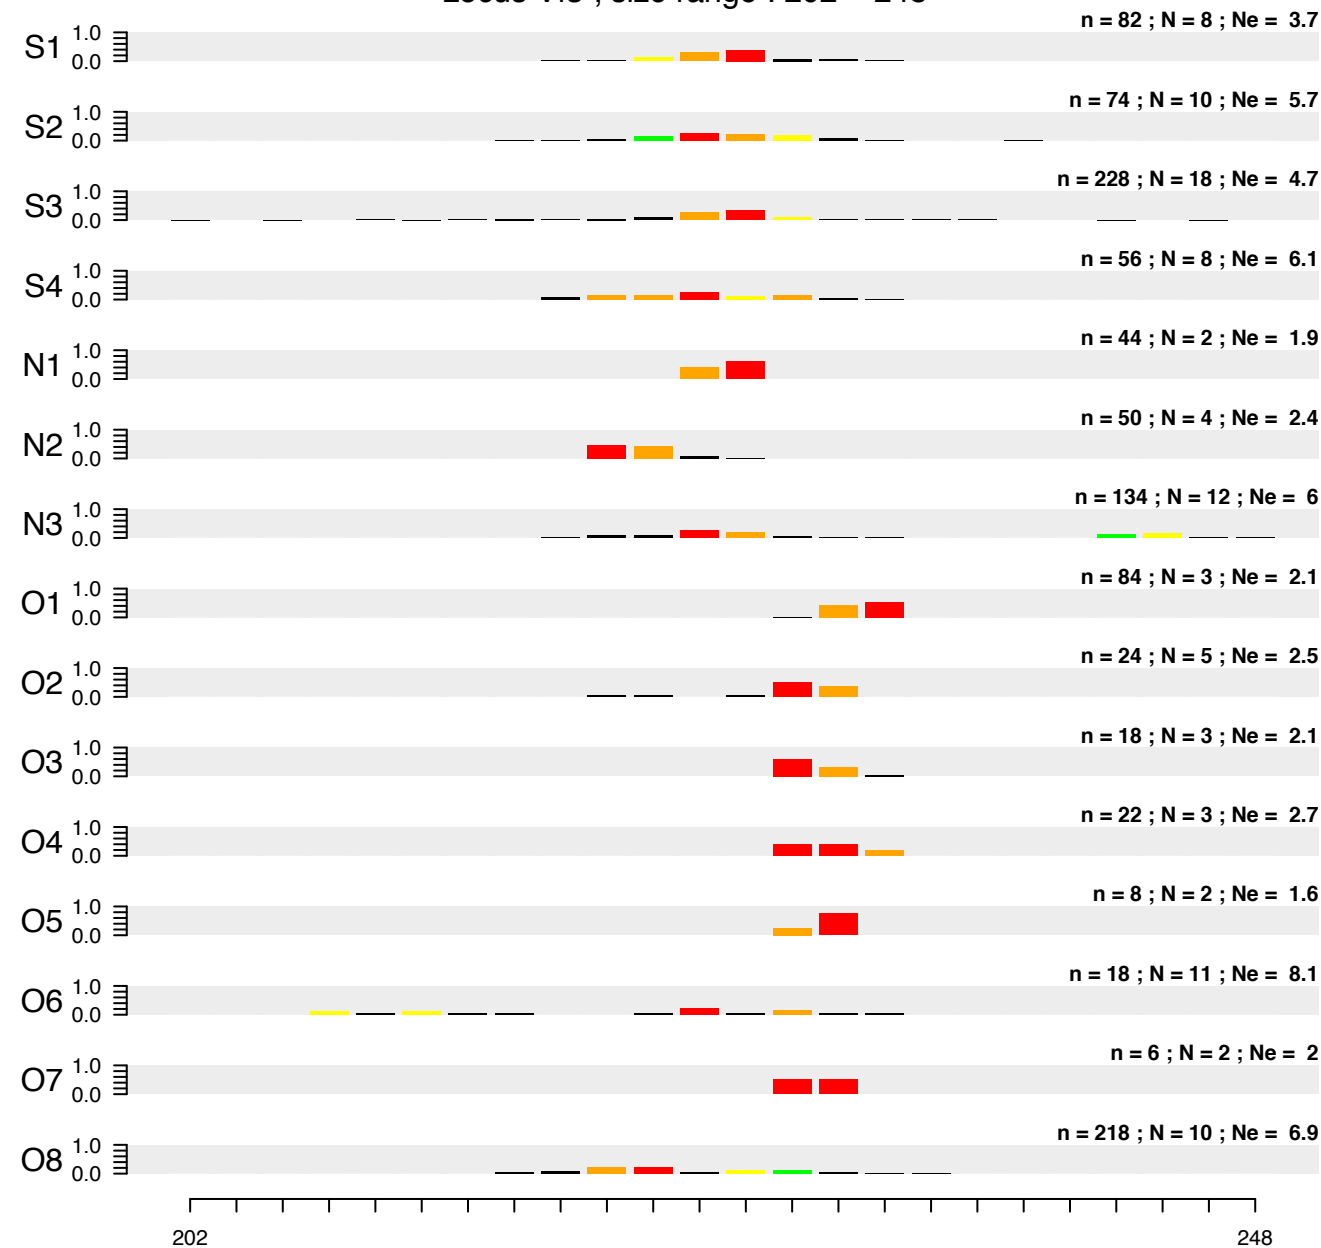

Figure S13

Locus A7c5 ; size range : 194 – 292

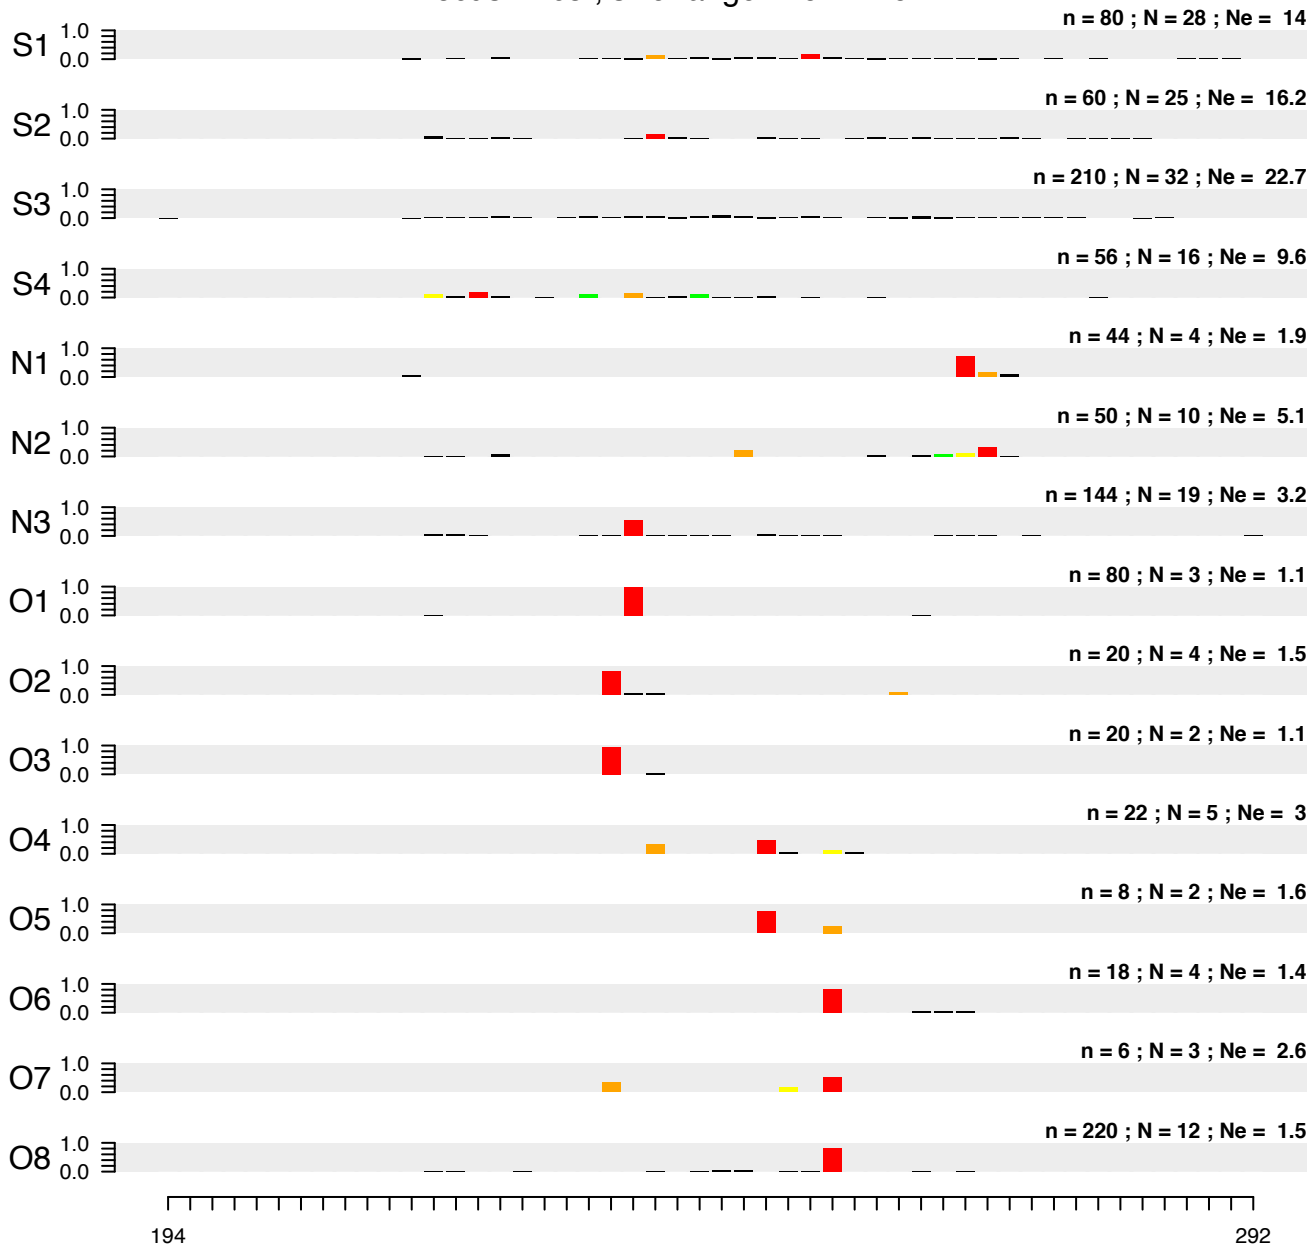

Figure S14

Locus A5f9 ; size range : 208 – 262

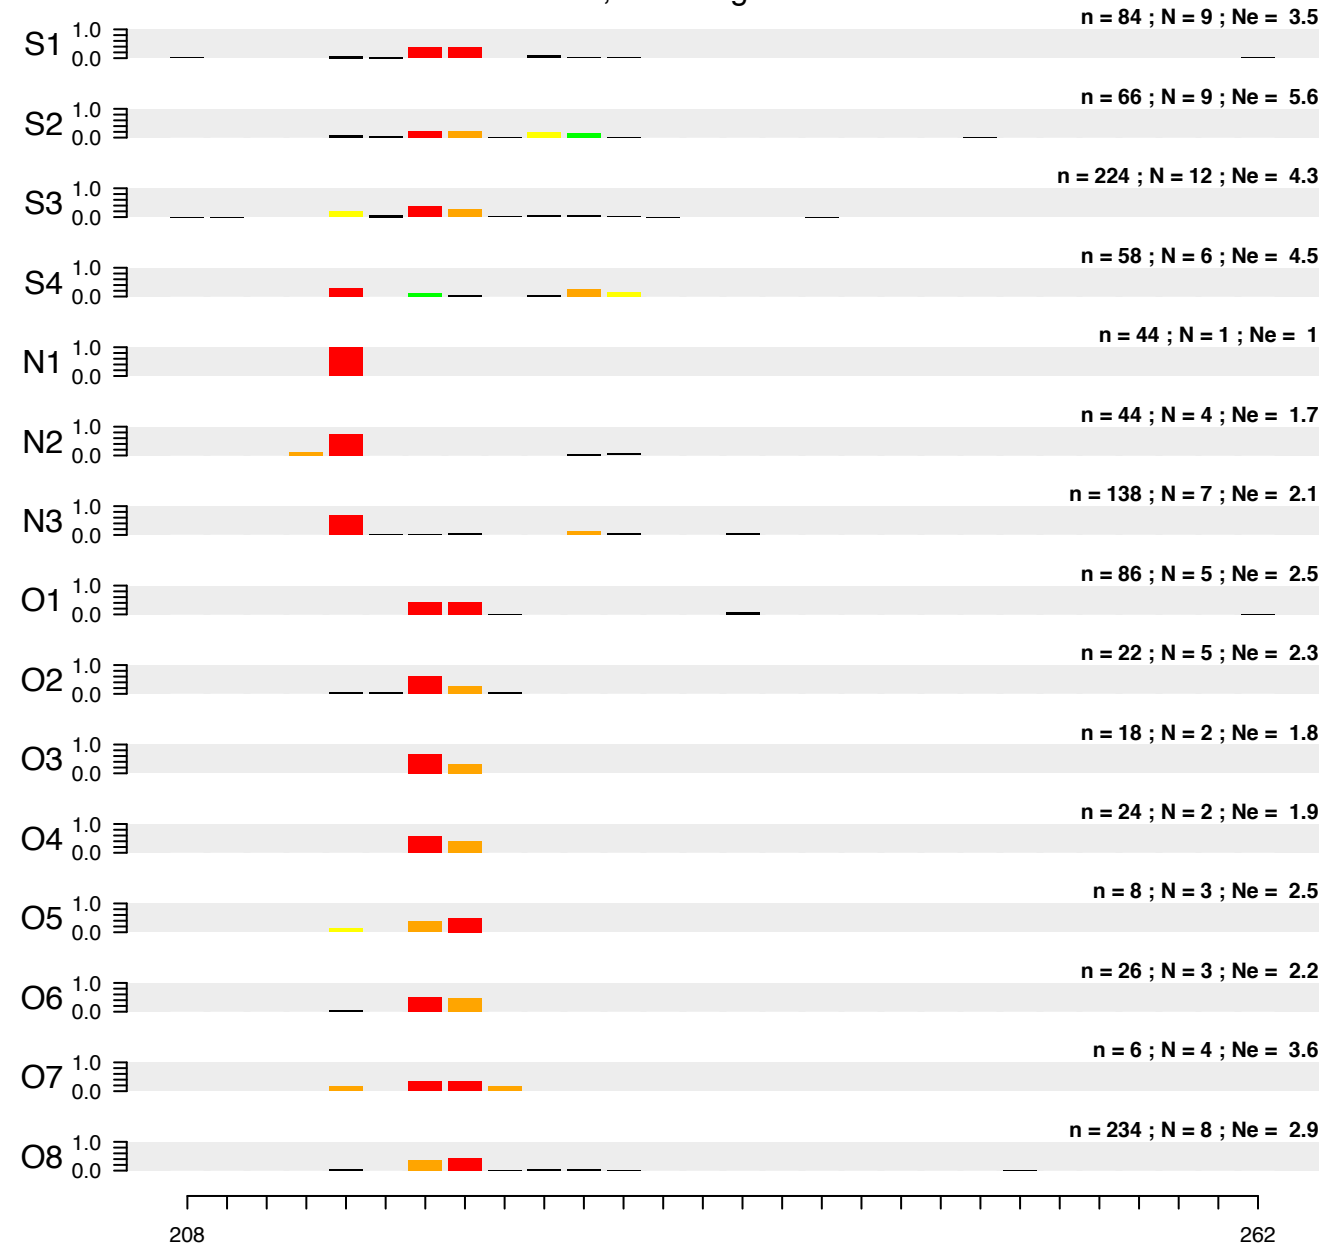



Figure S15

Locus A2a7 ; size range : 102 – 180

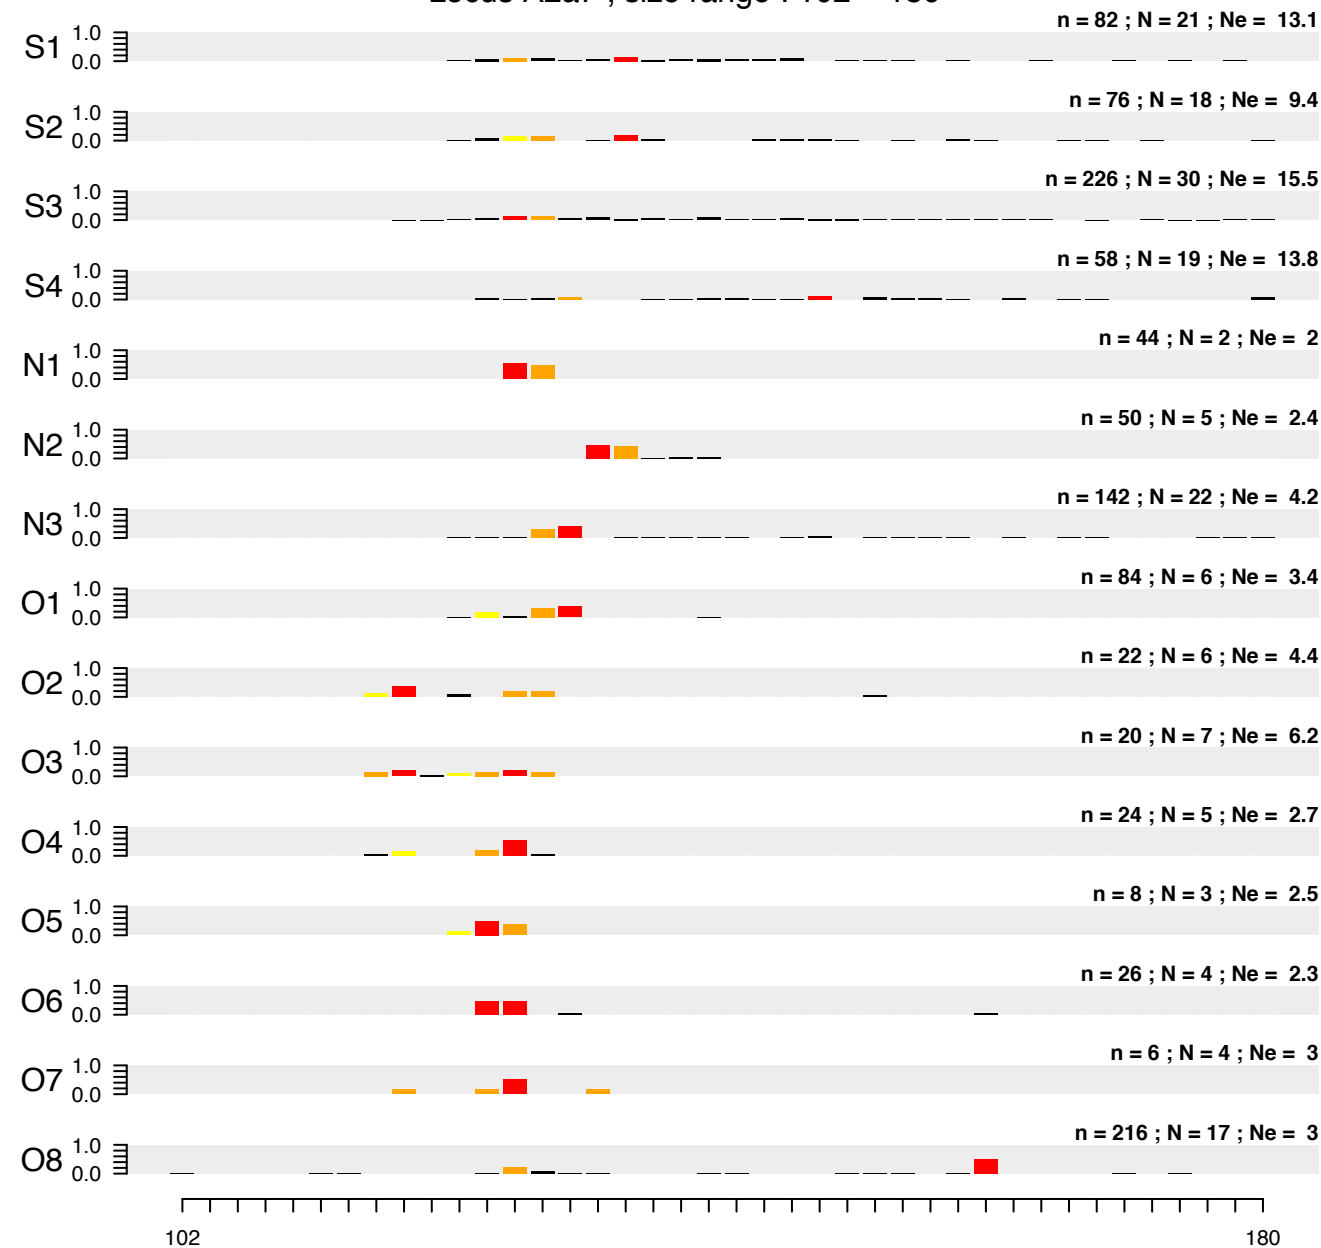

Figure S16

Locus a4g11 ; size range : 174 – 220

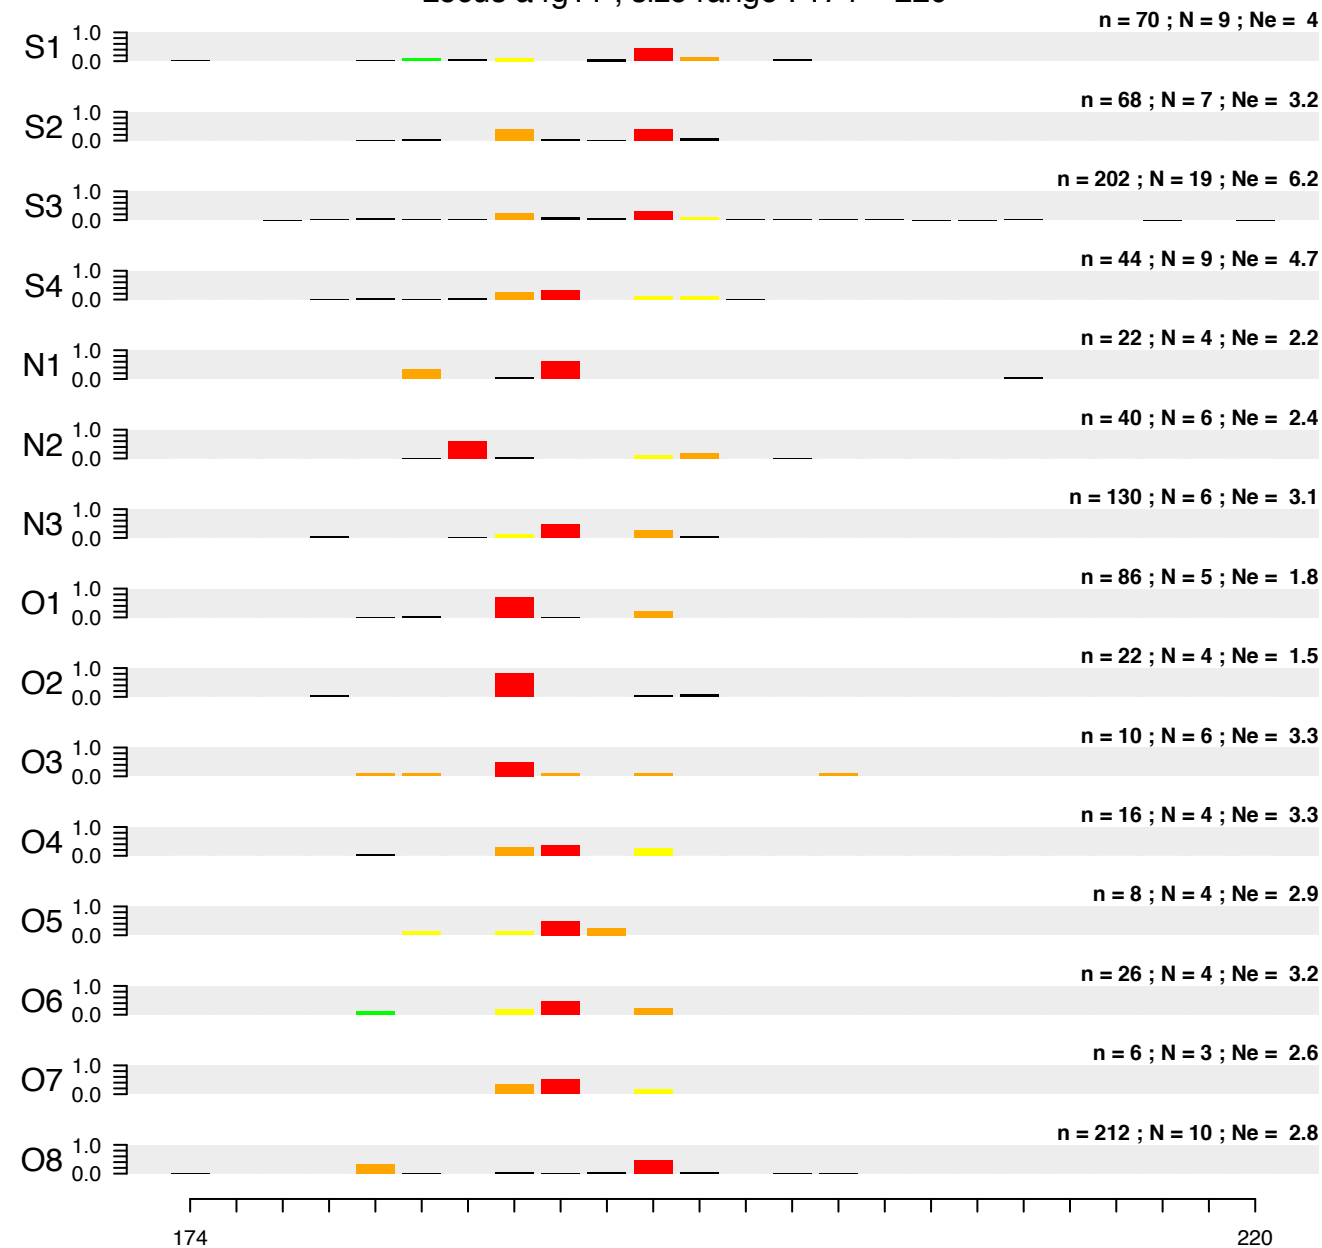

Figure S17

Locus a6f1 ; size range : 248 – 300

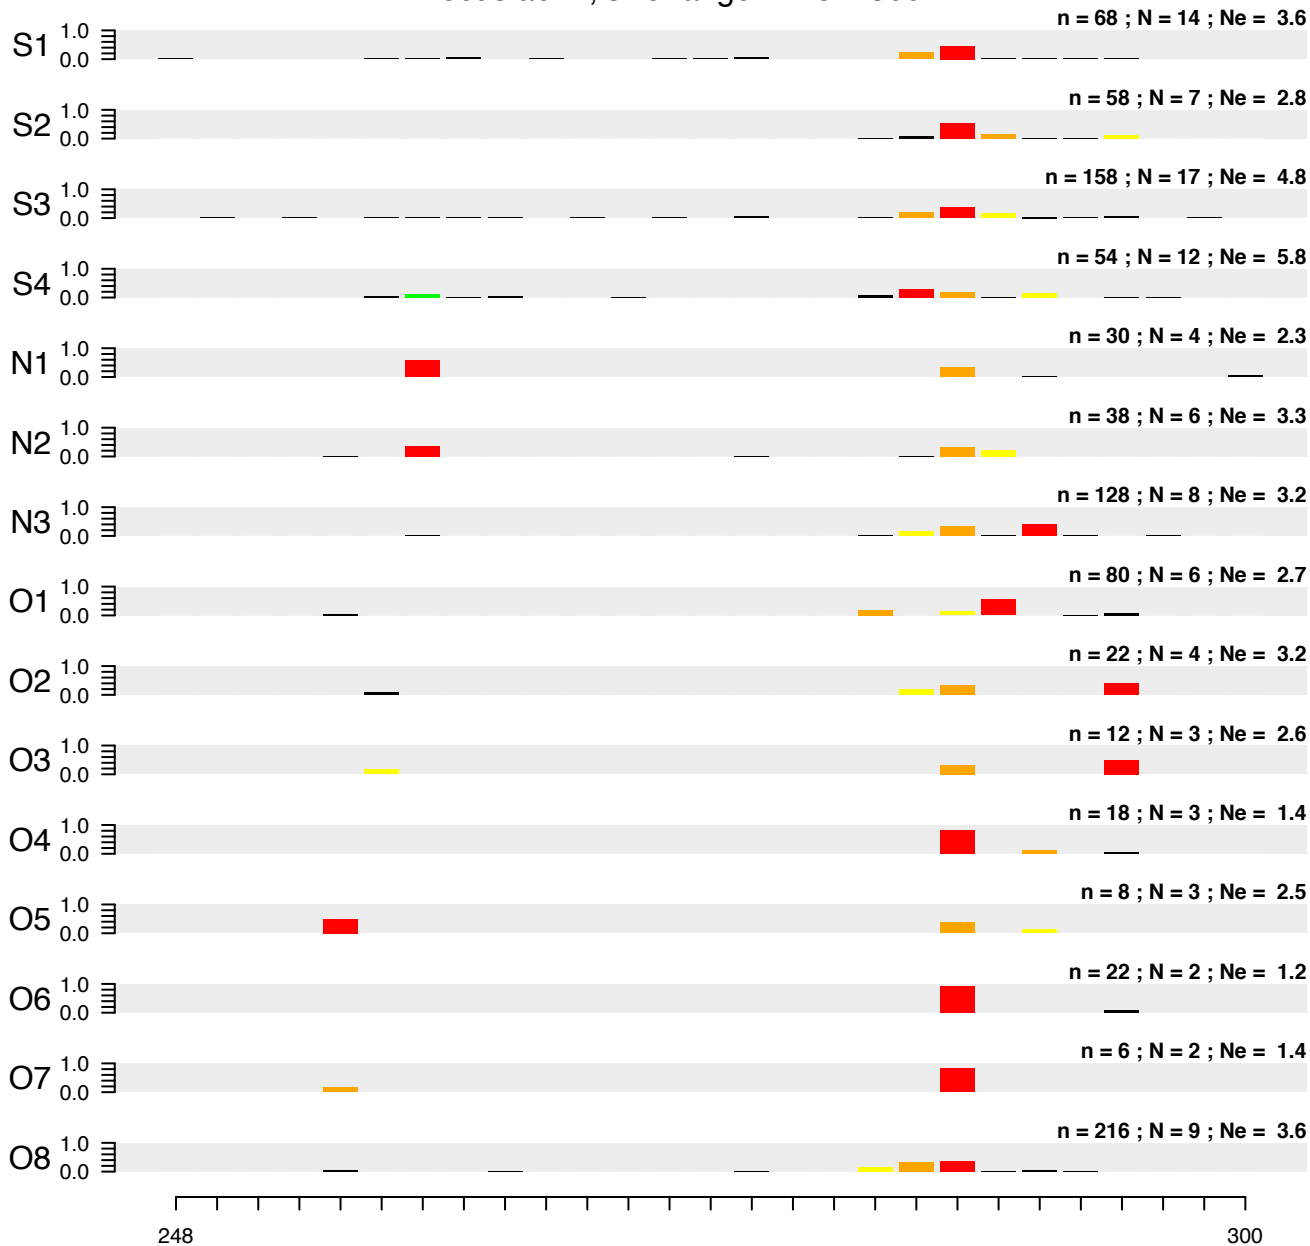

Figure S18

Locus wd11 ; size range : 174 – 218

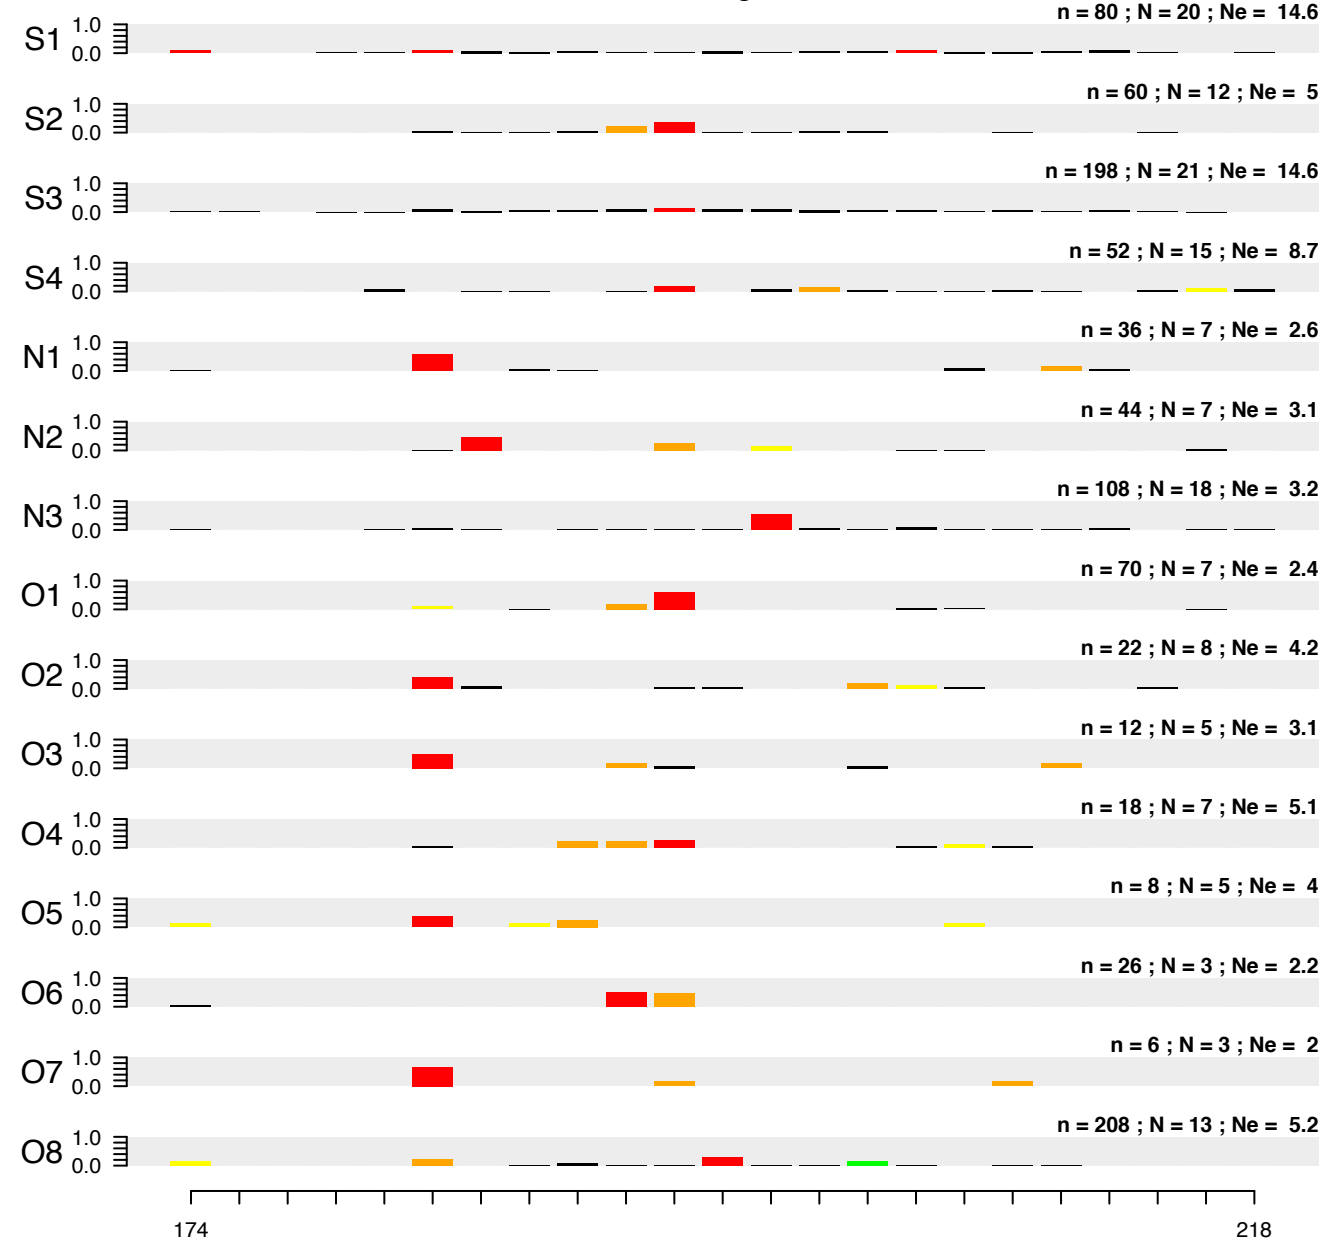

Figure S19

Locus a12f10 ; size range : 98 – 162

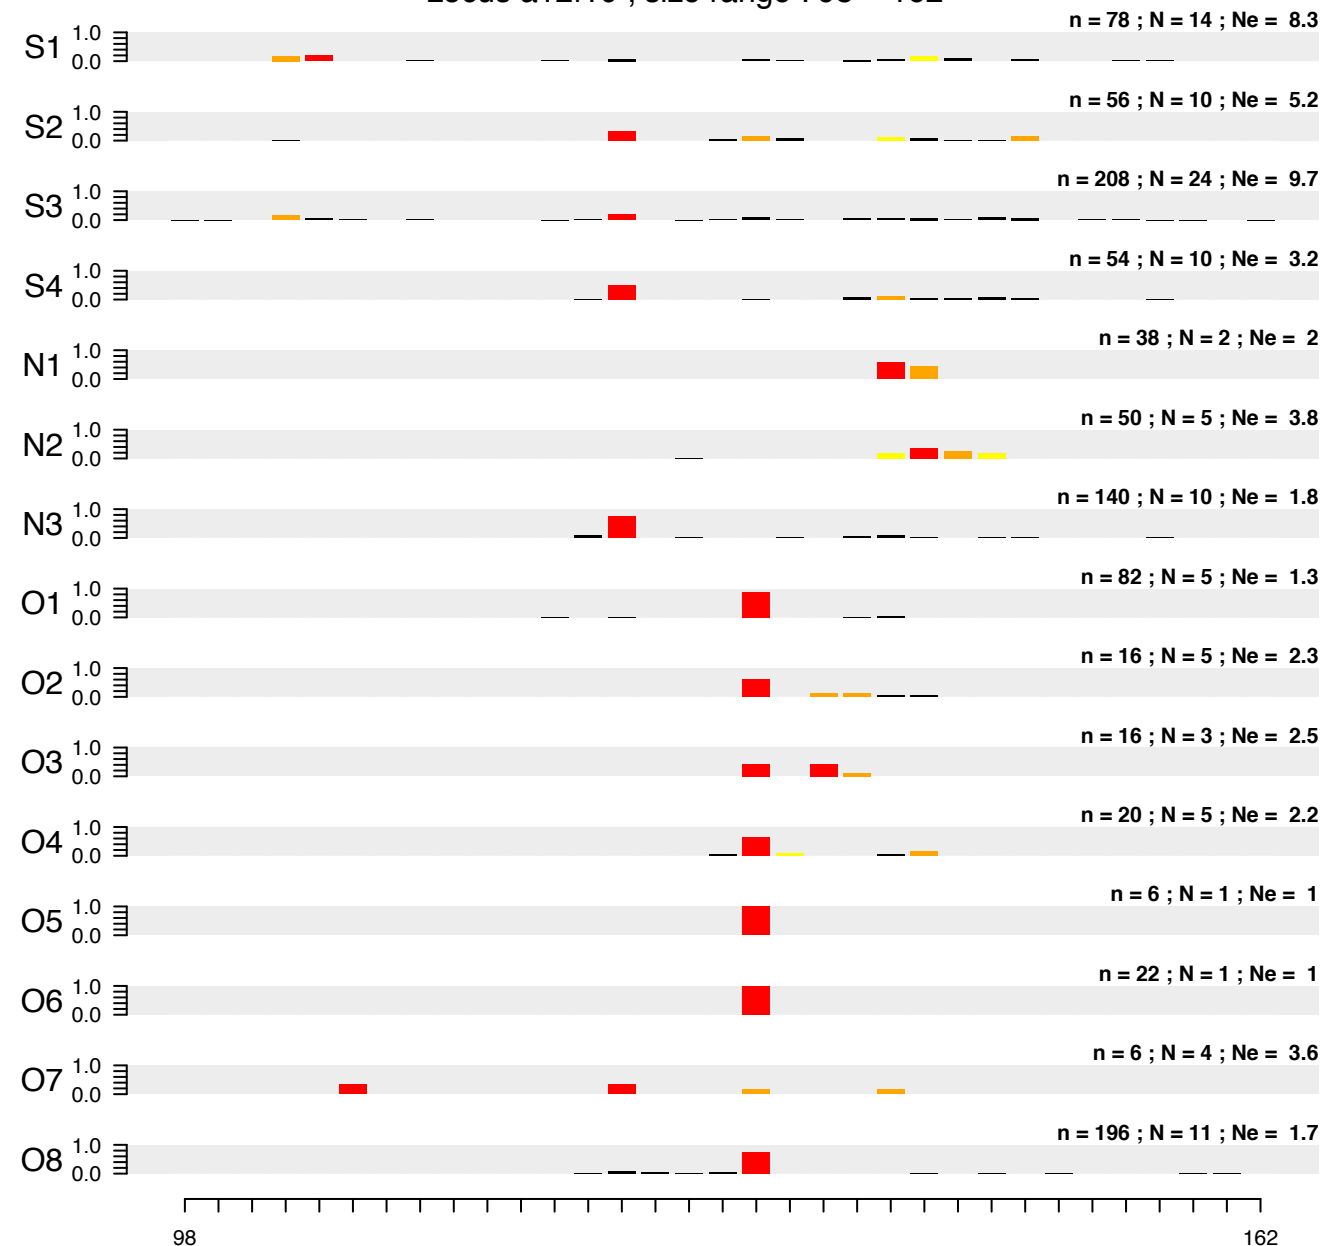

Figure S20

Locus lb9 ; size range : 184 – 256

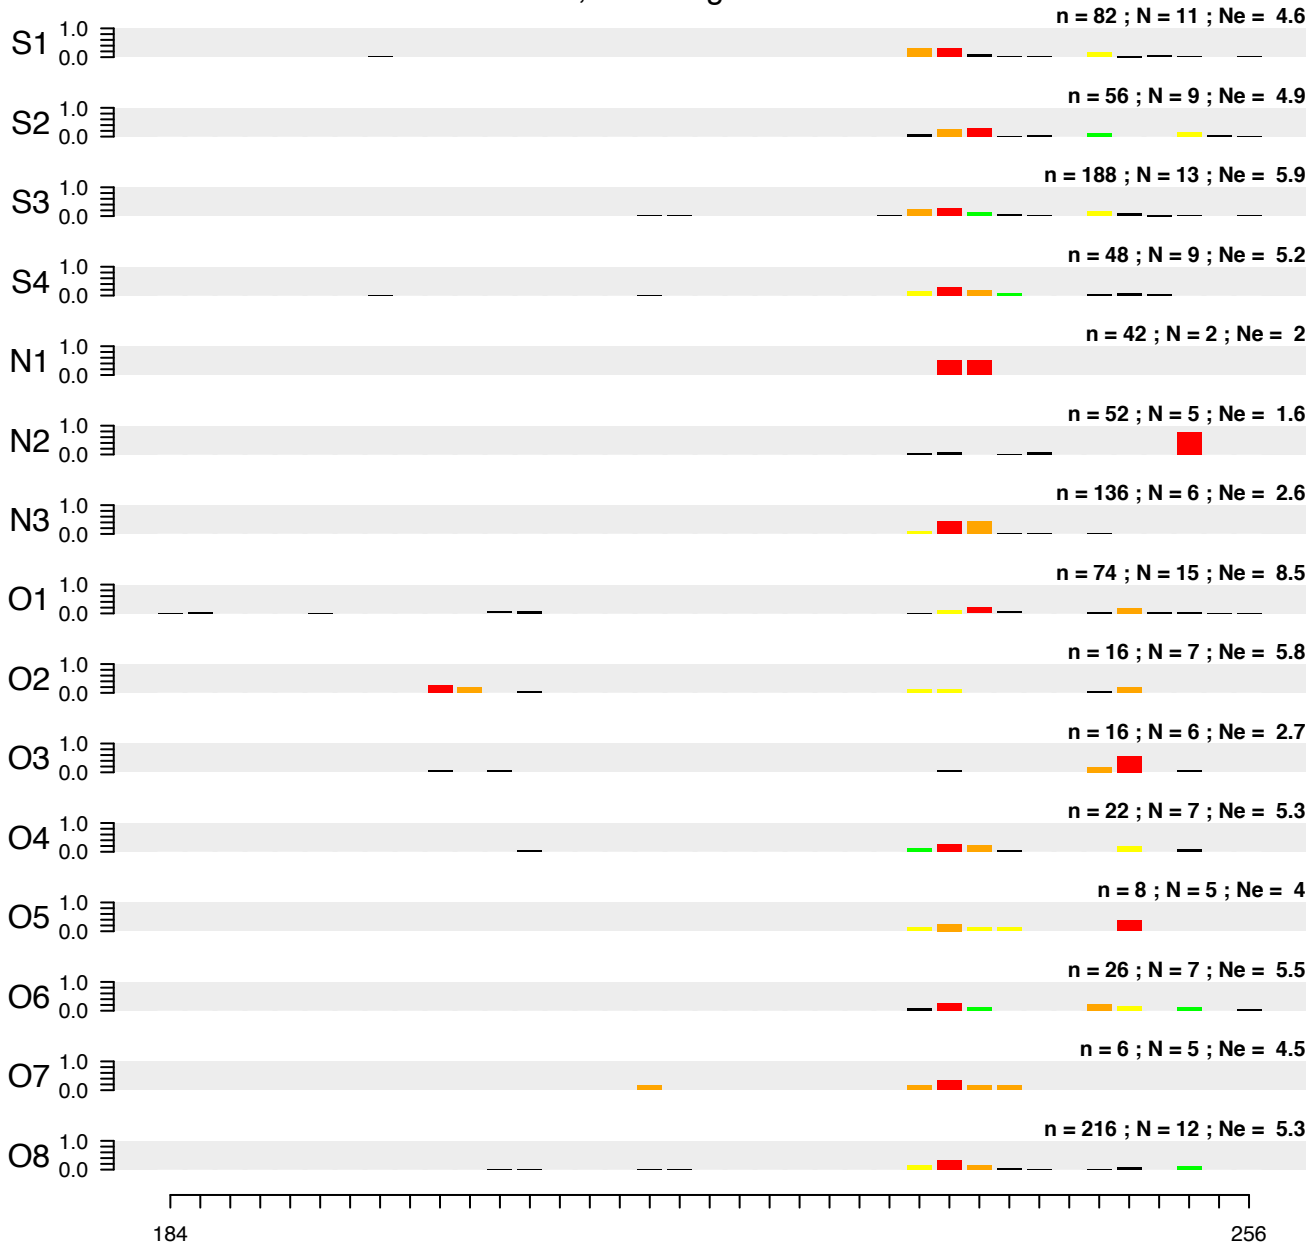

Figure S21

Locus wc12 ; size range : 182 – 234

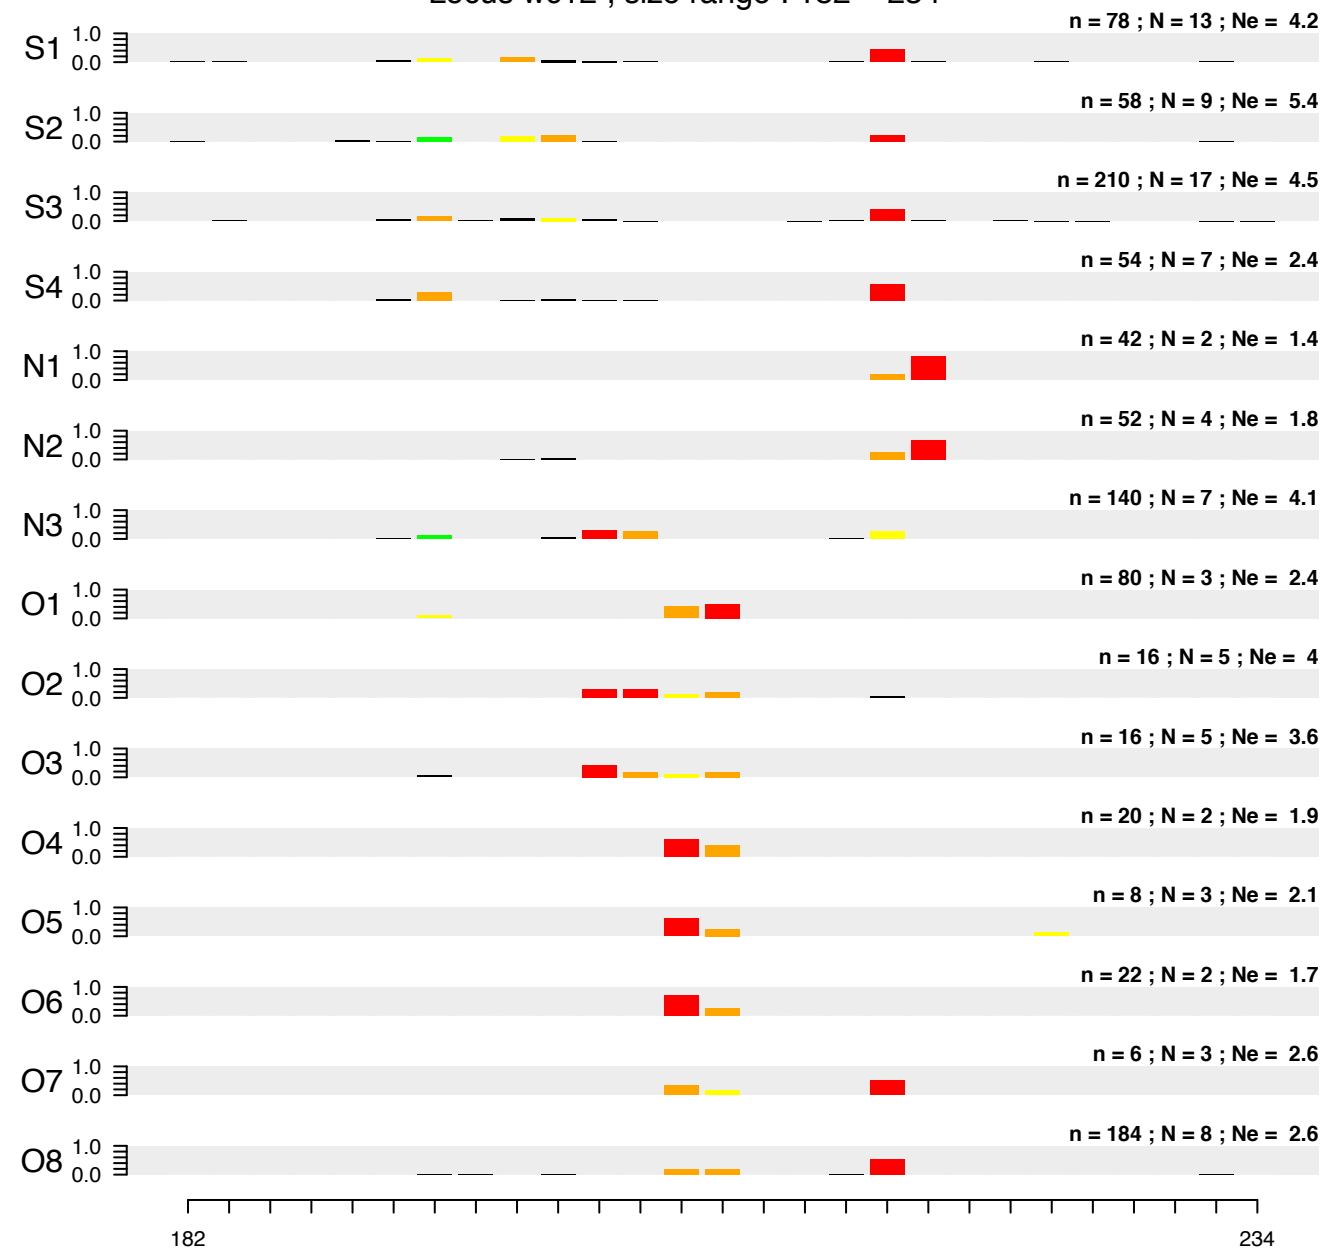

Figure S22

Locus a6h6 ; size range : 104 – 166

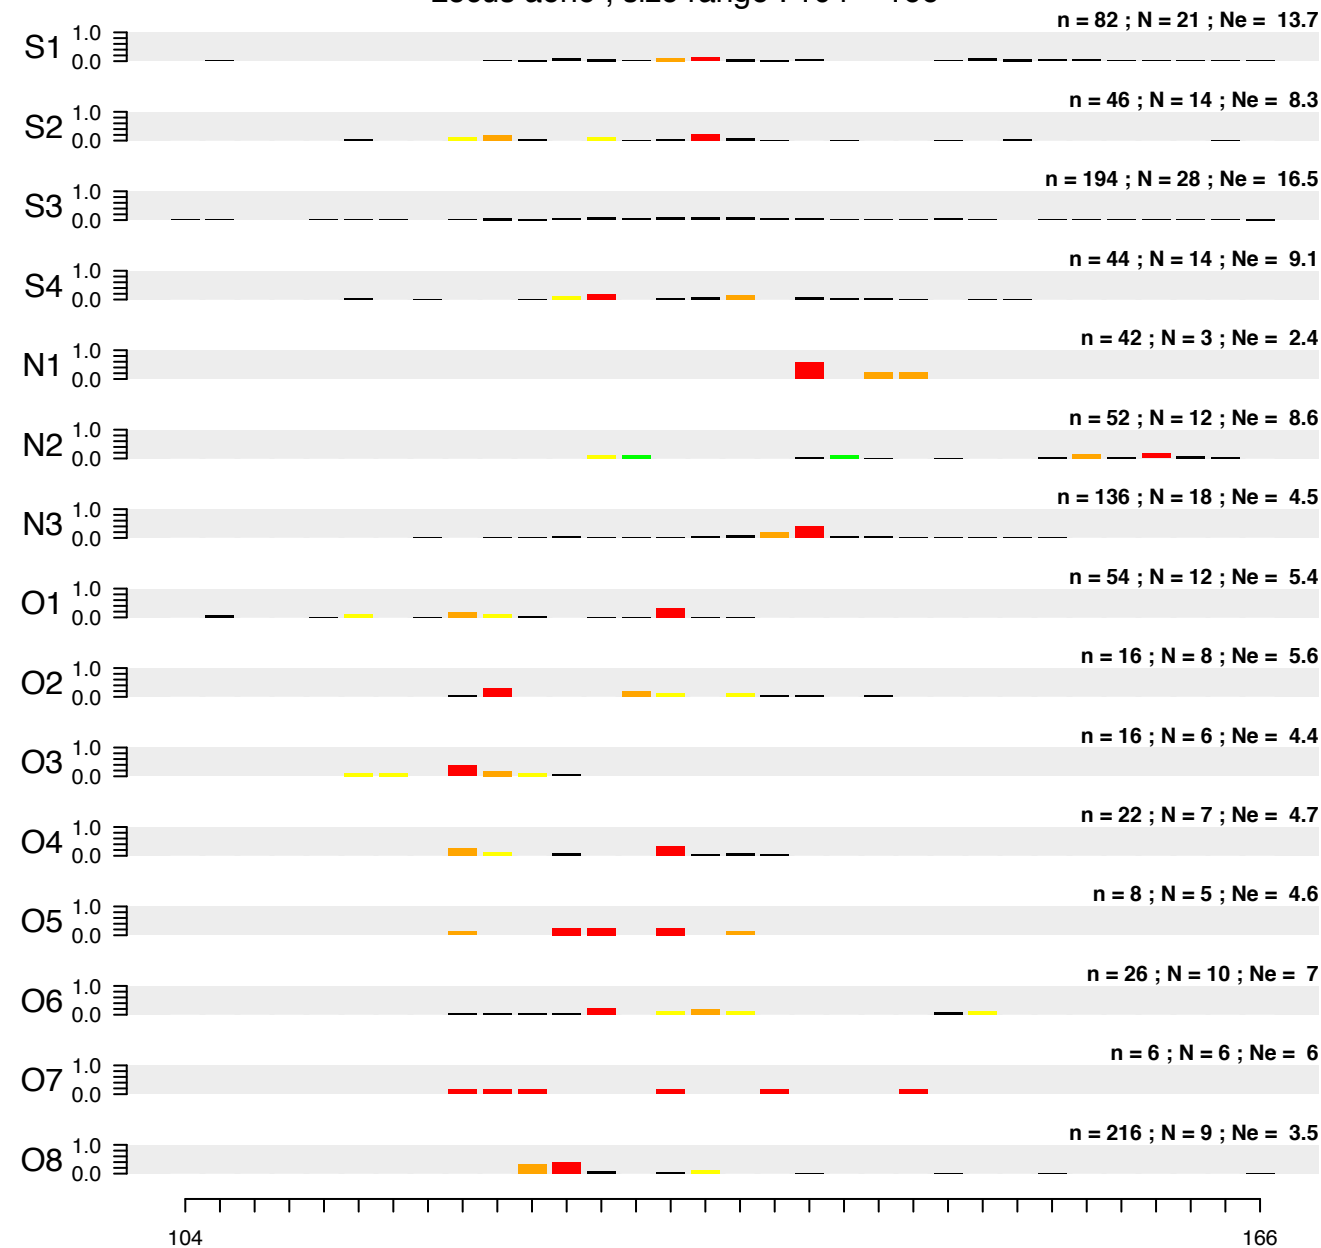



Figure S23

Locus wf6 ; size range : 292 – 328

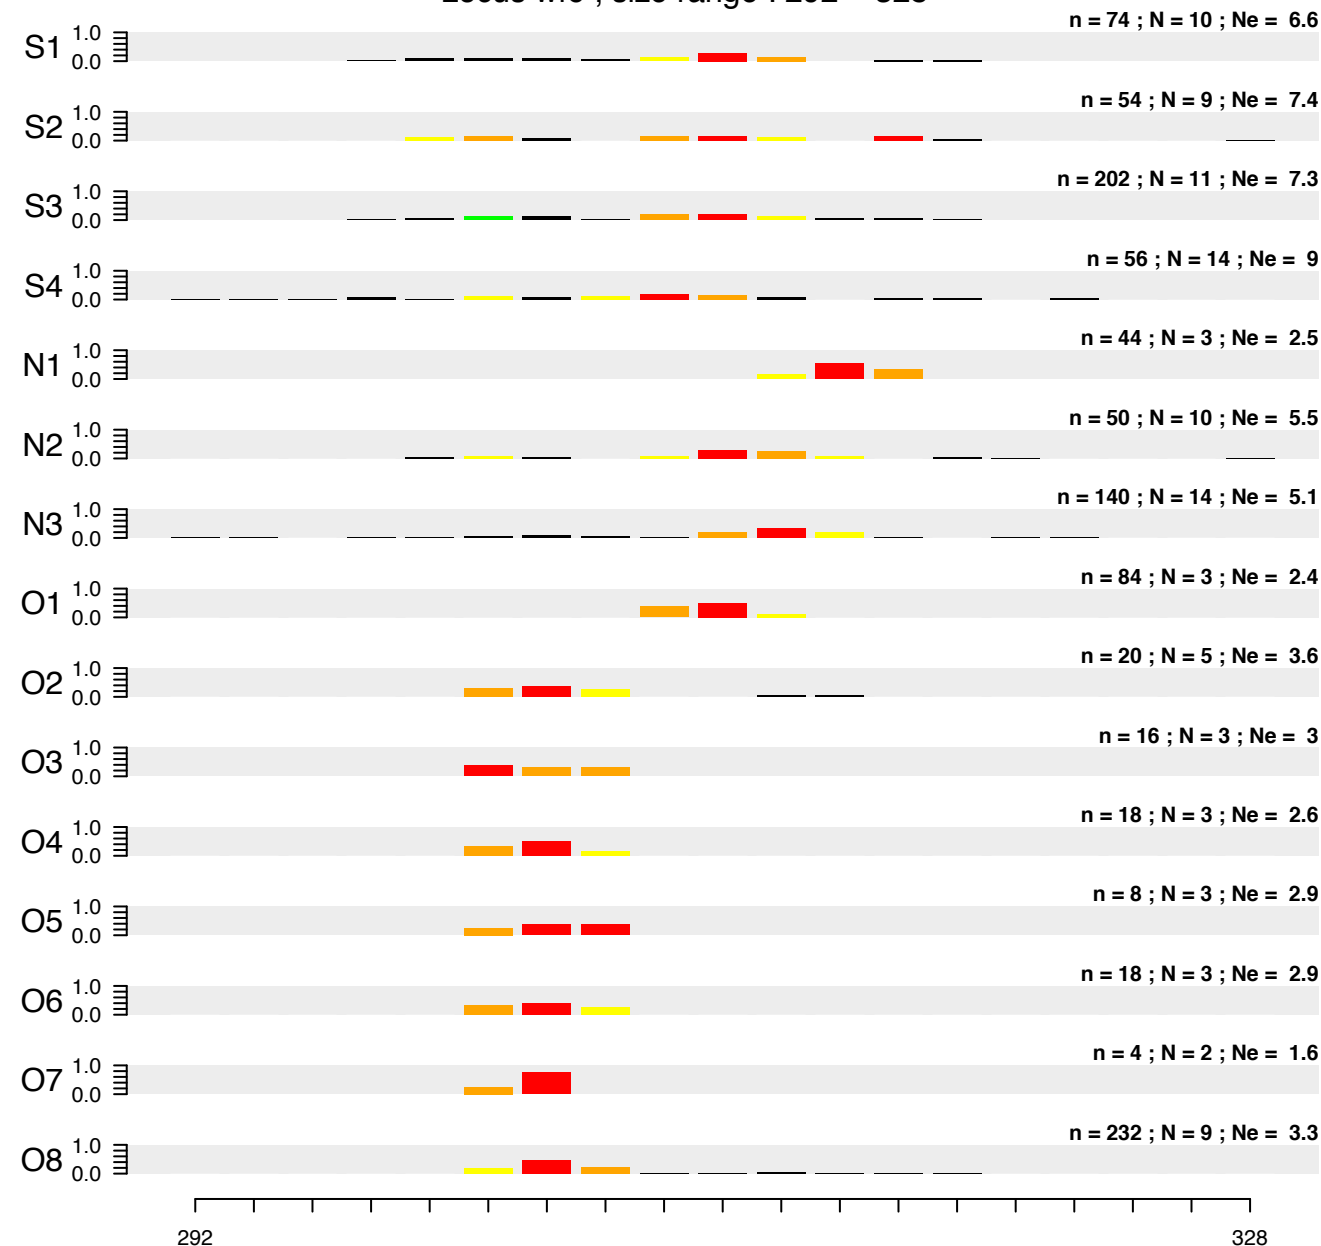

Figure S24

Locus a10b5 ; size range : 268 – 290

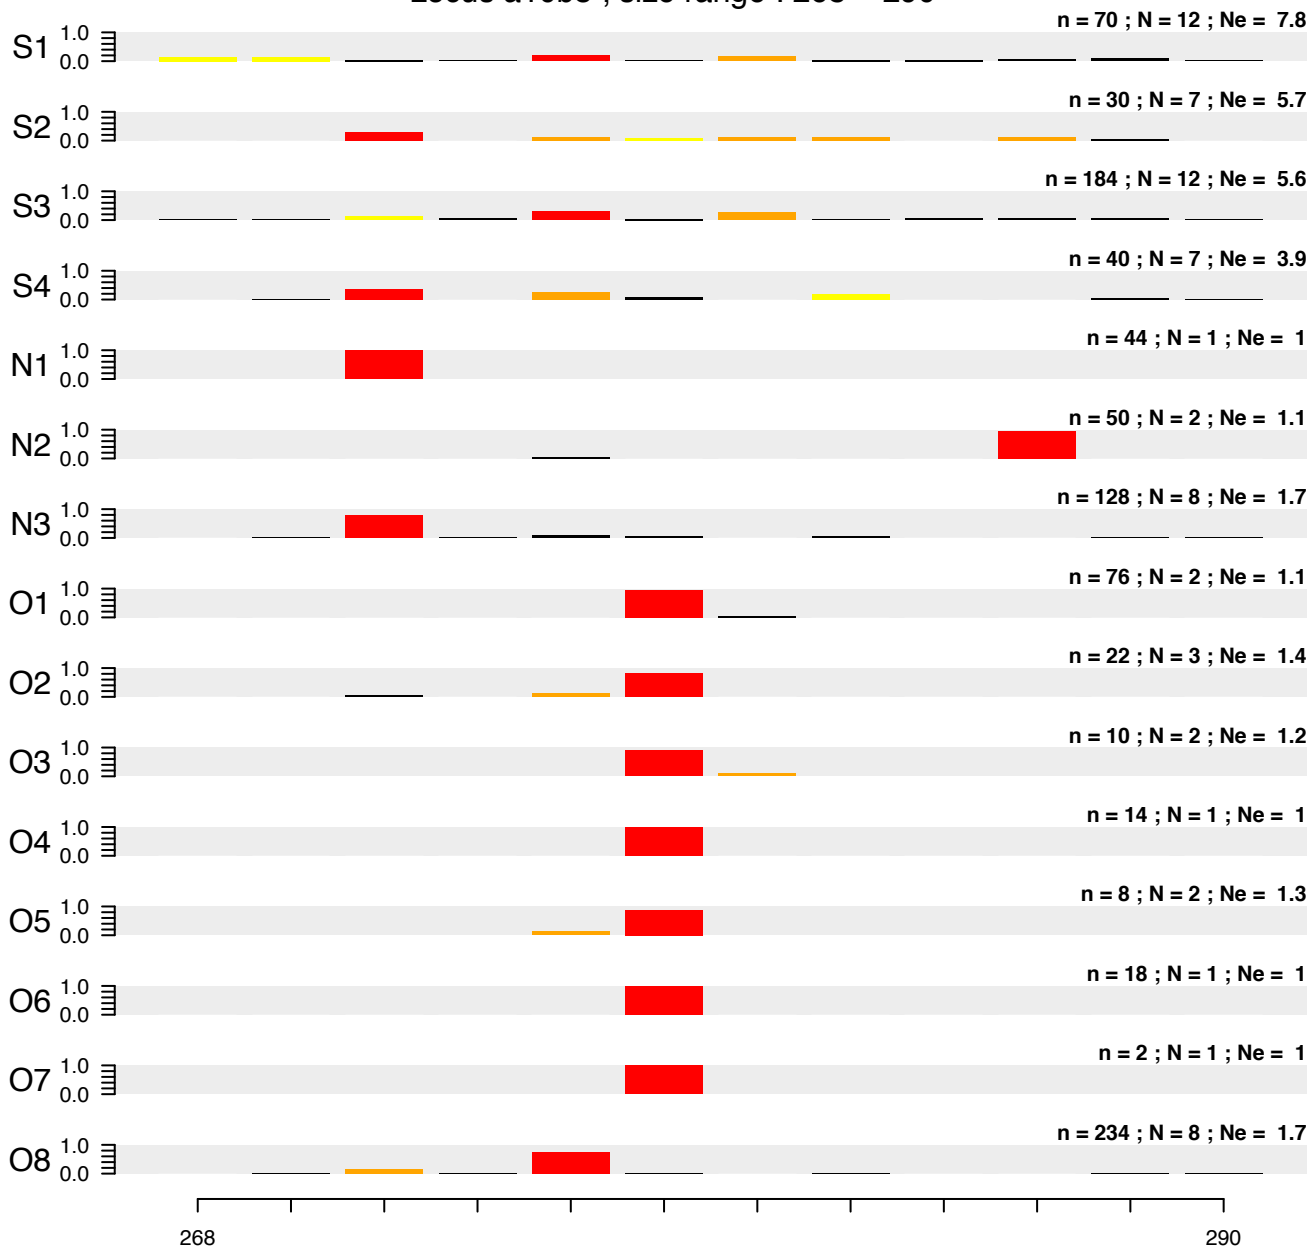

Figure S25

Locus vc10 ; size range : 250 – 304

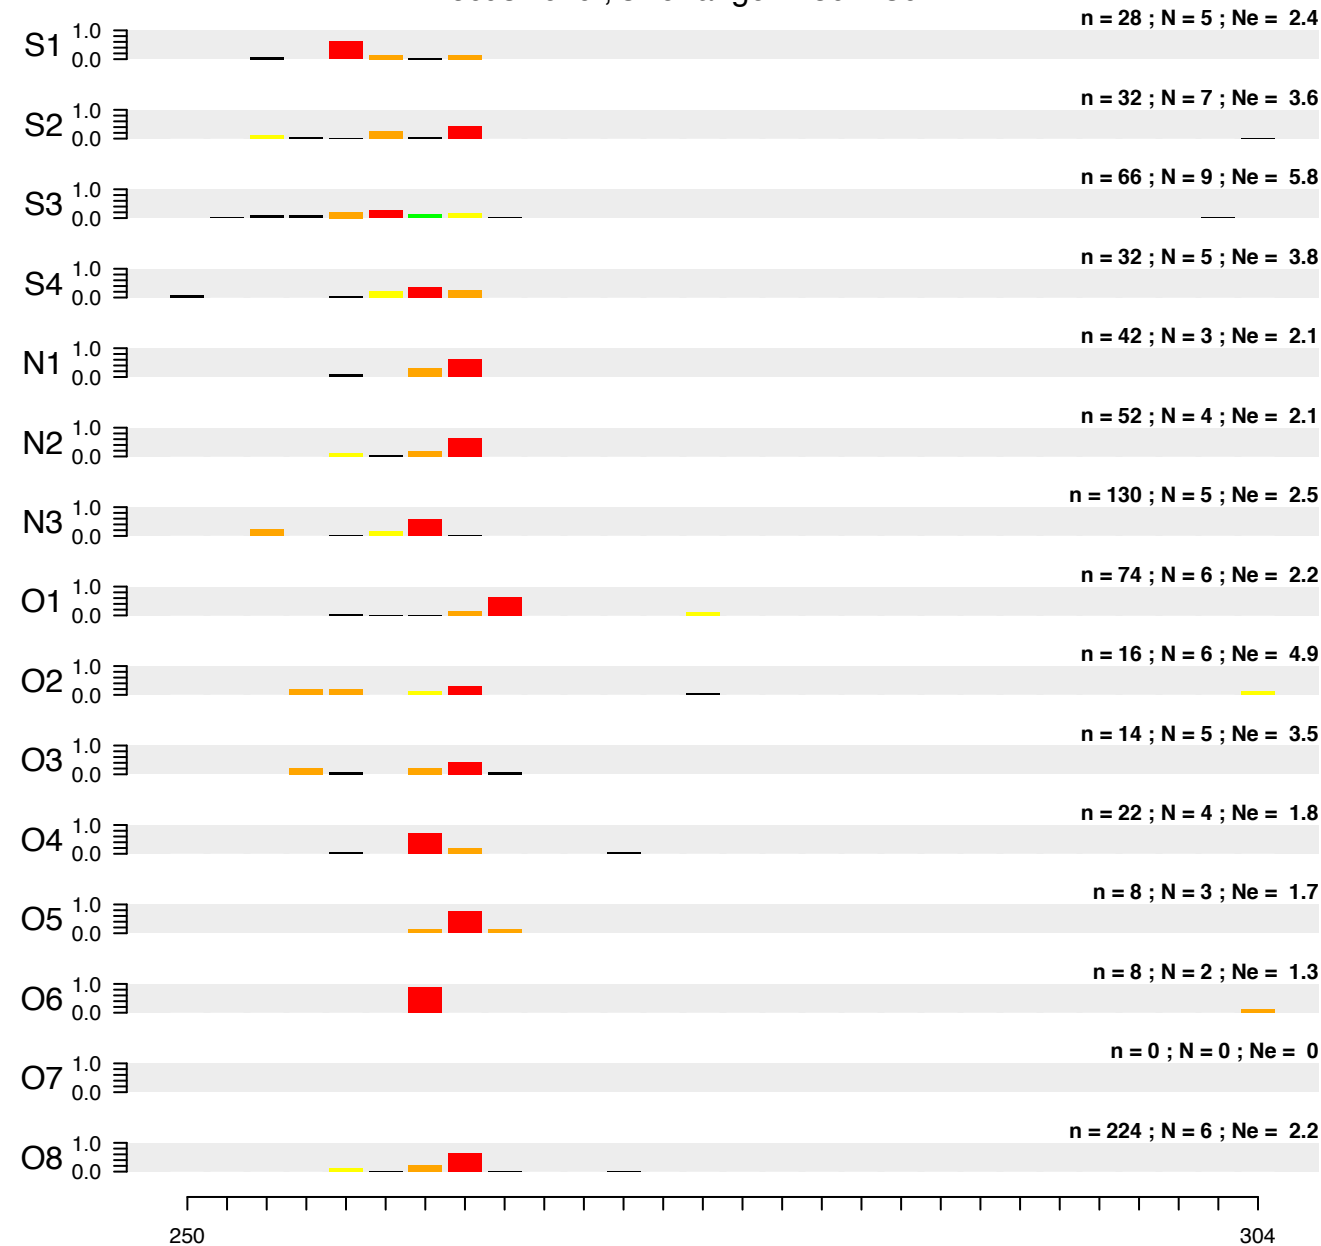

# Figure S26

Locus a8g5 ; size range : 166 – 202

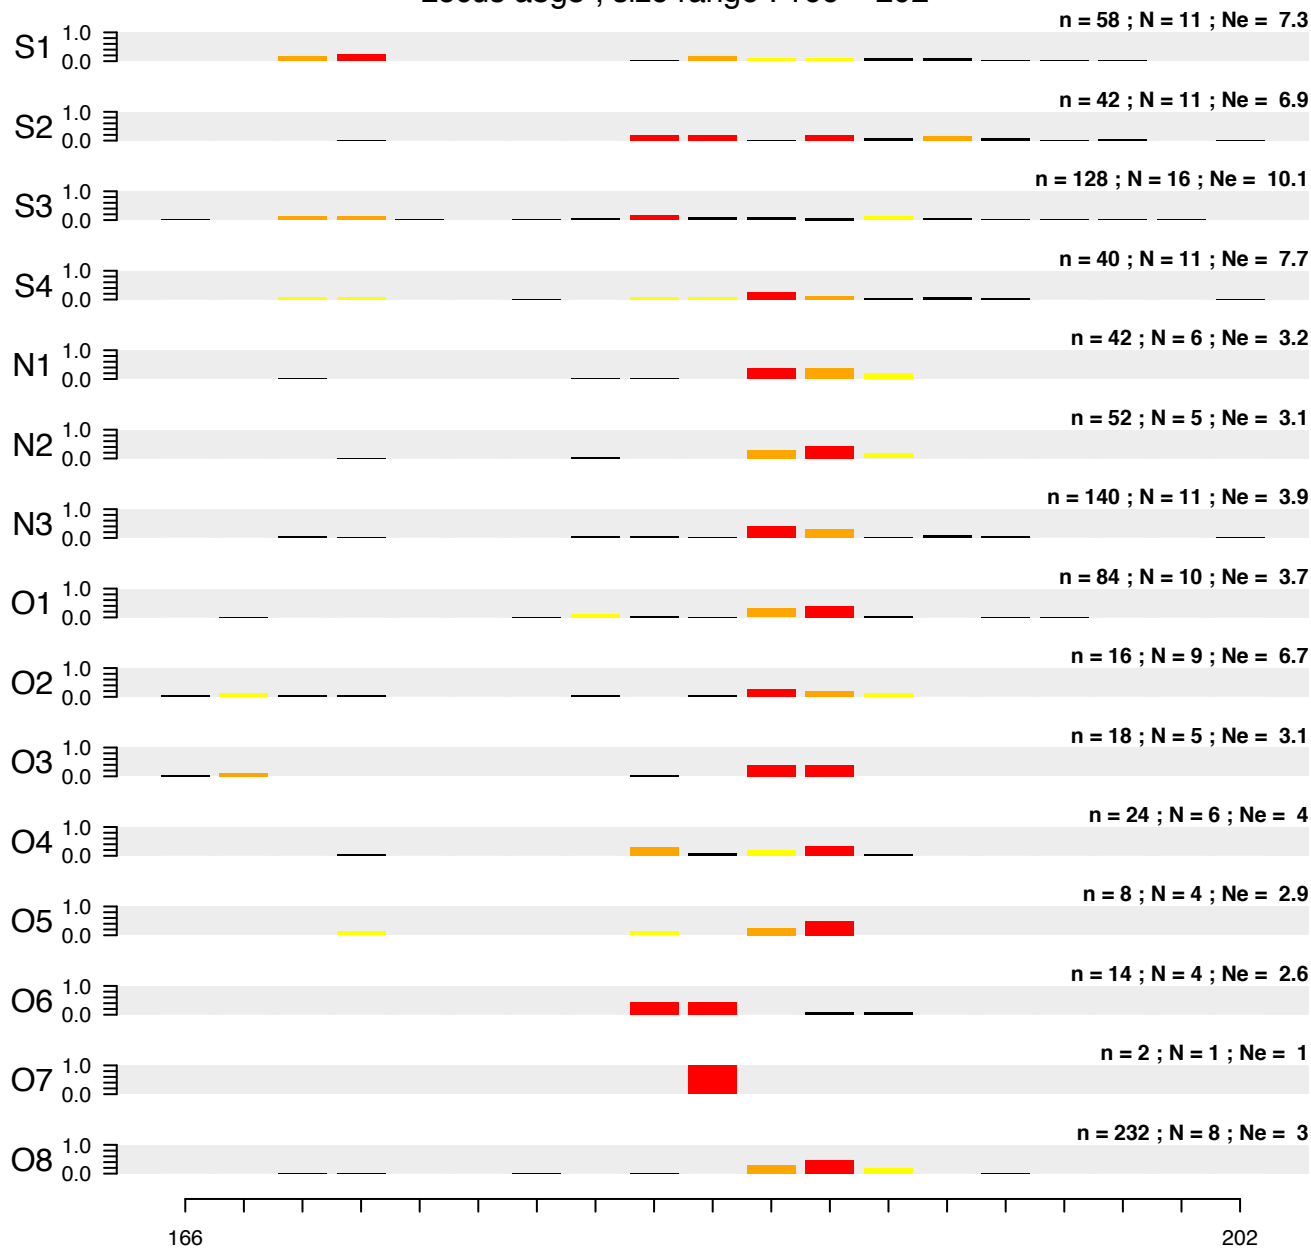

Supplement: 12862_2018_1156_MOESM3_ESM.pdf [file 12862_2018_1156_MOESM3_ESM.pdf]
