# Supplementary material for: Evidence for late Pleistocene origin of Astyanax mexicanus cavefish
Source: PubMed Central journal article supplement (PMC5905186; doi:10.1186/s12862-018-1156-7), 2018-04-18
Supplement: 12862_2018_1156_MOESM1_ESM.pdf [file 12862_2018_1156_MOESM1_ESM.pdf]

# Supplementary figures

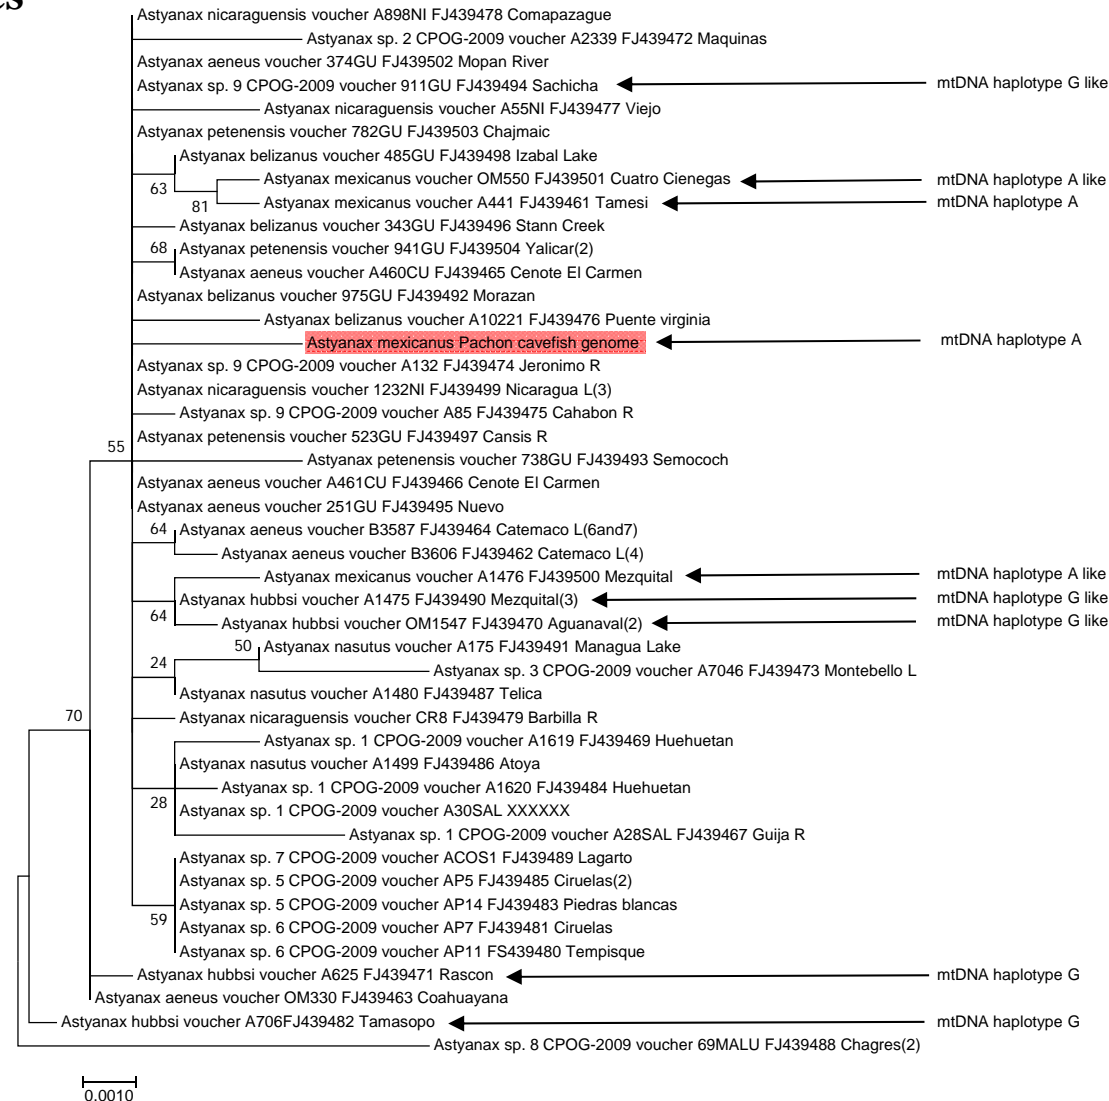

**Figure S1:** Rag1 phylogeny. The evolutionary tree was inferred by using the Maximum Likelihood method based on the Tamura-Nei model. The analysis involved 45 nucleotide sequences. All positions containing gaps and missing data were eliminated. There were a total of 1251 positions in the final dataset. Evolutionary analyses were conducted in MEGA5 [1]. All sequences belong to surface fish, excepted one Pachón cavefish sequence from the genome project and highlighted in red. Individuals with mtDNA belonging to A or G haplogroups are indicated as well as those with mtDNA haplotypes closely related to these haplogroups.

[1] Tamura K., Peterson D., Peterson N., Stecher G., Nei M., and Kumar S. (2011). MEGA5: Molecular Evolutionary Genetics Analysis using Maximum Likelihood, Evolutionary Distance, and Maximum Parsimony Methods. *Molecular Biology and Evolution* (10):2731-9.

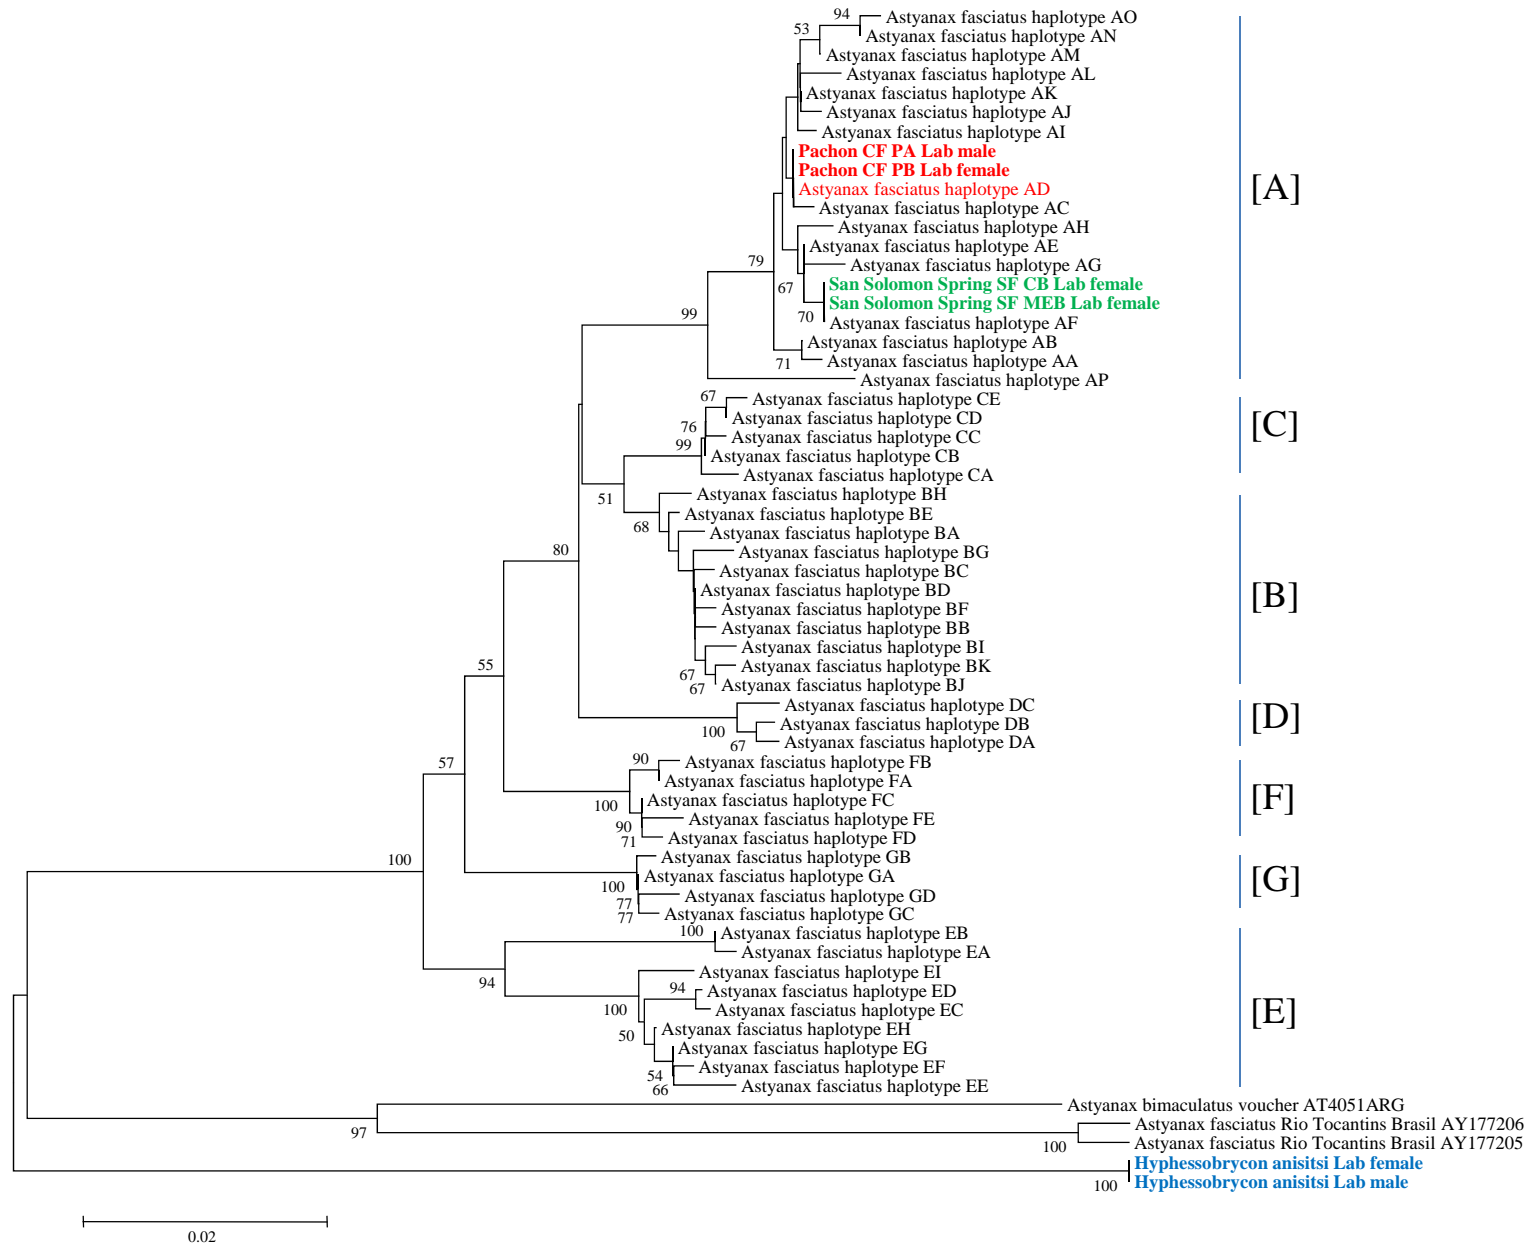

**Figure S2:** Neighbor joining phylogeny of *Astyanax mexicanus* cytb haplotypes (see Stecker et al. 2004 for more details). Seven haplogroups were identified [A] to [G]. Cavefish haplotypes belong to haplogroup [A] and [G]. In the Pachón cave, only the haplotype AD was found (red). The two San Solomon Spring surface fish are in green, the two *Hyphessobrycon anisitsi* fish are in blue. The names of the lab fish we sequenced are in bold.

## Chica - Surface O8 – S3

Sample size : 22 loci; 60 alleles/locus/population

Command line:

`./IMa2 -iinfileO8S3_n60.u -ooutput_O8S3_n60_m10.out -b200000 -l100000 -d100 -m10 -q200 -t4 -c1 -p23567 -r25 -u1 -hfg -hn50 -ha0.999 -hb0.3`

### Estimation of demographic parameters with IMa2

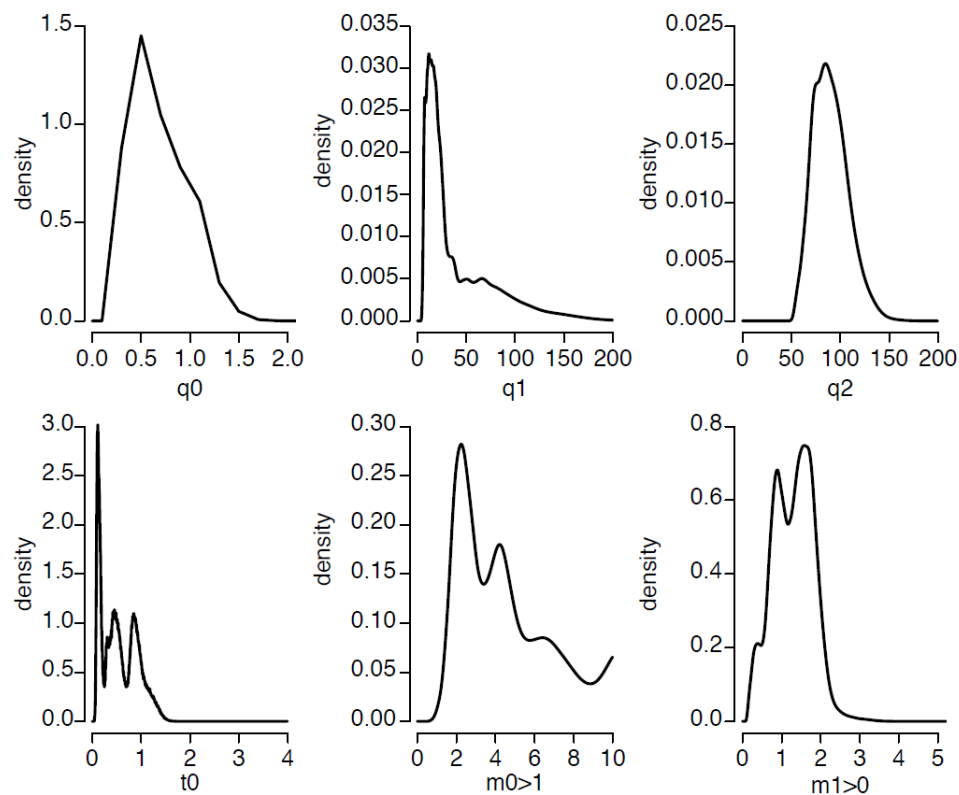

|                                        | HiPt                    | HPD 95%                       |
|----------------------------------------|-------------------------|-------------------------------|
| <b>q0 (4N<sub>e</sub>u Chica)</b>      | 0.500                   | 0.300 – 2.500                 |
| <b>q1 (4N<sub>e</sub>u Surface)</b>    | 11.700                  | 3.900 – 120.7                 |
| <b>q2 (4N<sub>e</sub>u Ancestral)</b>  | 84.900                  | 57.500 – 125.300              |
| <b>t0 (tu)</b>                         | 0.114                   | 0.005- 1.186                  |
| <b>m0&gt;1 (m<sub>0-&gt;1</sub>/u)</b> | 2.245                   | 1.275 – 9.995                 |
| <b>m1&gt;0 (m<sub>1-&gt;0</sub>/u)</b> | 1.585                   | 0.275 – 2.145                 |
| <b>N<sub>e</sub> Chica</b>             | 250                     | 150 – 1,250                   |
| <b>N<sub>e</sub> Surface</b>           | 5,850                   | 1,950 – 60,350                |
| <b>N<sub>e</sub> Ancestral</b>         | 42,450                  | 28,750 – 62,650               |
| <b>t</b>                               | 798                     | 30 – 8,302                    |
| <b>m<sub>s-&gt;c</sub></b>             | 11.2 x 10 <sup>-4</sup> | 6.4 – 50.0 x 10 <sup>-4</sup> |
| <b>m<sub>c-&gt;s</sub></b>             | 7.93 x 10 <sup>-4</sup> | 1.3 – 10.7 x 10 <sup>-4</sup> |

We assumed a mutation rate (u) of 0.0005 and a mean generation time (g) of 3.5 years (2 years for surface fish and 5 years for cavefish). HiPt: the highest value in the histogram of the posterior marginal density. HPD 95%: the lower and upper bound of the estimated 95% highest posterior density (HPD) interval. Effective population size (N<sub>e</sub>) Chica = q0 / 4u ; N<sub>e</sub> surface = q1 / 4u ; N<sub>e</sub> ancestral = q2 / 4u ; t (divergence time in years) = t0 x g / u ; m<sub>s->c</sub> (migration rate from surface to Chica) = m0>1 x u ; m<sub>c->s</sub> (migration rate from Chica to surface) = m1>0 x u. m0>1 and m1>0 are migration rate backward in time, whereas m<sub>s->c</sub> and m<sub>c->s</sub> are migration rate forward in time.

**Figure S3:**

# Pachón - Chica

## O1 – O8

Sample size : 22 loci; 60 alleles/locus/population

Command line:

`./IMa2 -iinfileO1O8_n60.u -ooutputO1O8_n60_long.out -b10000 -l1100000 -d100 -m5 -q200 -t4 -p2367 -r25 -u1 -hfg -hn50 -ha0.999 -hb0.3`

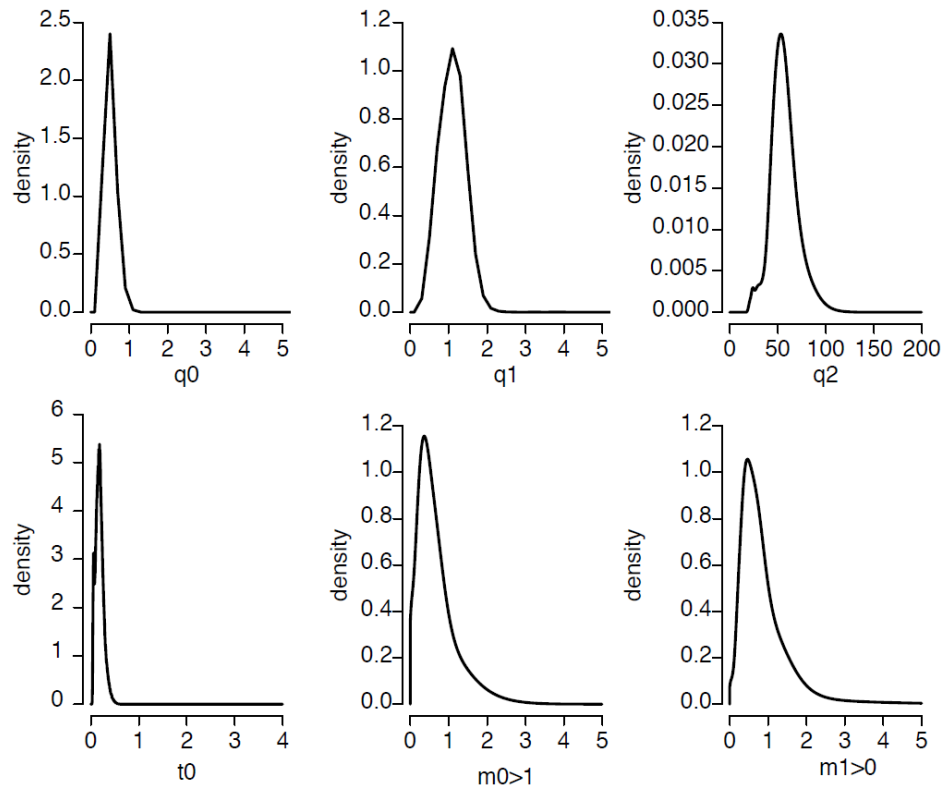

### Estimation of demographic parameters with IMA2

|                                        | HiPt                 | HPD 95%                     |
|----------------------------------------|----------------------|-----------------------------|
| <b>q0 (4N<sub>e</sub>u Pachón)</b>     | 0.500                | 0.300 – 2.300               |
| <b>q1 (4N<sub>e</sub>u Chica)</b>      | 1.100                | 0.300 – 3.100               |
| <b>q2 (4N<sub>e</sub>u Ancestral)</b>  | 53.300               | 28.300 – 88.300             |
| <b>t0 (tu)</b>                         | 0.182                | 0.038 – 0.346               |
| <b>m0&gt;1 (m<sub>0-&gt;1</sub>/u)</b> | 0.686                | 0.000 – 1.748               |
| <b>m1&gt;0 (m<sub>1-&gt;0</sub>/u)</b> | 0.866                | 0.000 – 2.027               |
| <b>N<sub>e</sub> Pachón</b>            | 250                  | 150 – 1150                  |
| <b>N<sub>e</sub> Chica</b>             | 550                  | 150 – 1,550                 |
| <b>N<sub>e</sub> Ancestral</b>         | 26,650               | 14,150 – 44,150             |
| <b>t</b>                               | 1,274                | 266 – 2,422                 |
| <b>m<sub>C-&gt;P</sub></b>             | $3.4 \times 10^{-4}$ | 0.0 – $8.7 \times 10^{-4}$  |
| <b>m<sub>P-&gt;C</sub></b>             | $4.3 \times 10^{-4}$ | 0.0 – $10.1 \times 10^{-4}$ |

We assumed a mutation rate (u) of 0.0005 and a mean generation time (g) of 5 years for cavefish. HiPt: the highest value in the histogram of the posterior marginal density. HPD 95%: the lower and upper bound of the estimated 95% highest posterior density (HPD) interval. Effective population size (N<sub>e</sub>) Pachón = q0 / 4u ; N<sub>e</sub> Chica = q1 / 4u ; N<sub>e</sub> ancestral = q2 / 4u ; t (divergence time in years) = t0 x g / u ; m<sub>C->P</sub> (migration rate from Chica to Pachón) = m0>1 x u ; m<sub>P->S</sub> (migration rate from Pachón to Chica) = m1>0 x u. m0>1 and m1>0 are migration rate backward in time, whereas m<sub>S->P</sub> and m<sub>P->S</sub> are migration rate forward in time.

**Figure S4:**

# Molino - Surface

## N1 – S1

Sample size : 14 loci; 40 alleles/locus/population

Command line:

`./IMa2 -iinfileN1S1_n40.u -ooutput_N1S1_n40_longrun.out -b200000 -l100000 -d100 -m20 -q200 -t4 -c1 -p23567 -r25 -u1 -hfg -hn50 -ha0.999 -hb0.3`

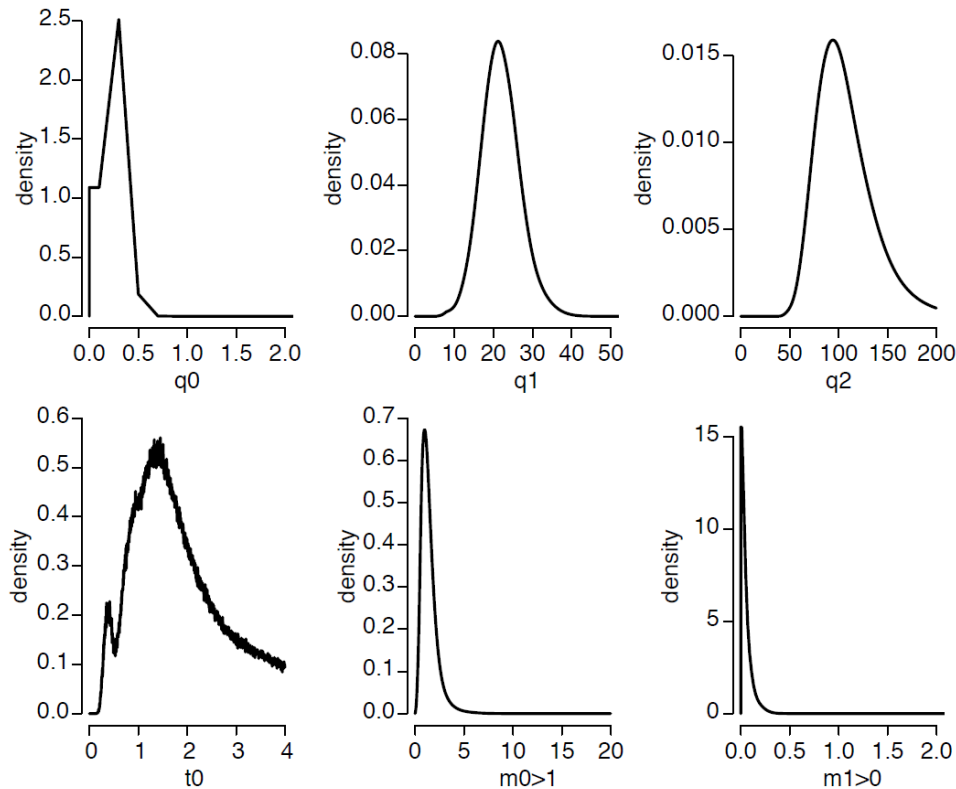

### Estimation of demographic parameters with IMa2

|                                       | HiPt                   | HPD 95%                       |
|---------------------------------------|------------------------|-------------------------------|
| <b>q0 (4N<sub>e</sub>u Molino)</b>    | 0.300                  | 0.000 – 1.900                 |
| <b>q1 (4N<sub>e</sub>u Surface)</b>   | 21.100                 | 12.100 – 31.900               |
| <b>q2 (4N<sub>e</sub>u Ancestral)</b> | 94.100                 | 57.900 – 163.100              |
| <b>t0 (tu)</b>                        | 1.450                  | 0.286 – 3.570                 |
| <b>m0&gt;1 (m<sub>0&gt;1</sub>/u)</b> | 0.970                  | 0.190 – 3.030                 |
| <b>m1&gt;0 (m<sub>1&gt;0</sub>/u)</b> | 0.010                  | 0.000 – 0.250                 |
| <b>N<sub>e</sub> Molino</b>           | 150                    | 0 – 950                       |
| <b>N<sub>e</sub> Surface</b>          | 10,550                 | 6,050 – 15,950                |
| <b>N<sub>e</sub> Ancestral</b>        | 47,050                 | 28,950 – 81,550               |
| <b>t</b>                              | 10,150                 | 2,002 – 24,990                |
| <b>m<sub>S-&gt;M</sub></b>            | 4.9 x 10 <sup>-4</sup> | 1.0 – 15.2 x 10 <sup>-4</sup> |
| <b>m<sub>M-&gt;S</sub></b>            | 5.0 x 10 <sup>-6</sup> | 0.0 – 1.3 x 10 <sup>-4</sup>  |

We assumed a mutation rate (u) of 0.0005 and a mean generation time (g) of 3.5 years (2 years for surface fish and 5 years for cavefish). HiPt: the highest value in the histogram of the posterior marginal density. HPD 95%: the lower and upper bound of the estimated 95% highest posterior density (HPD) interval. Effective population size (N<sub>e</sub>) Molino = q0 / 4u ; N<sub>e</sub> surface = q1 / 4u ; N<sub>e</sub> ancestral = q2 / 4u ; t (divergence time in years) = t0 x g / u ; m<sub>S->M</sub> (migration rate from surface to Molino) = m0>1 x u ; m<sub>M->S</sub> (migration rate from Molino to surface) = m1>0 x u. m0>1 and m1>0 are migration rate backward in time, whereas m<sub>S->M</sub> and m<sub>M->S</sub> are migration rate forward in time.

**Figure S5:**

# Caballo Moro - Surface

## N2 – S2

Sample size : 18 loci; 40 alleles/locus/population

Command line:

/IMa2 -iinfileN2S2\_n40.u -ooutput\_N2S2\_n40\_m5\_longrun.out -b200000 -l100000 -d100 -m5 -q200 -t4 -c1 -p23567 -r25 -u1 -hfg -hn50 -ha0.999 -hb0.3

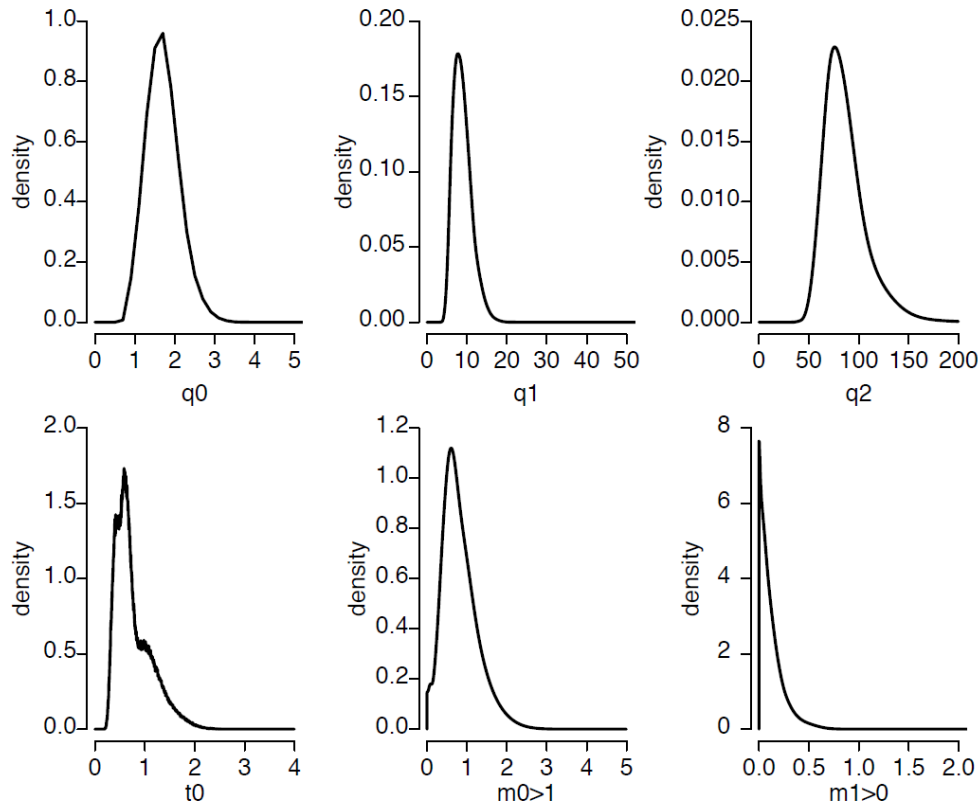

### Estimation of demographic parameters with IMa2

|                                        | HiPt                   | HPD 95%                      |
|----------------------------------------|------------------------|------------------------------|
| <b>q0 (4N<sub>e</sub>u Caballo M.)</b> | 1.700                  | 0.700 – 3.700                |
| <b>q1 (4N<sub>e</sub>u Surface)</b>    | 7.700                  | 4.300 – 13.900               |
| <b>q2 (4N<sub>e</sub>u Ancestral)</b>  | 75.900                 | 50.500- 130.700              |
| <b>t0 (tu)</b>                         | 0.582                  | 0.262 – 1.518                |
| <b>m0&gt;1 (m<sub>0&gt;1</sub>/u)</b>  | 0.603                  | 0.008 – 1.657                |
| <b>m1&gt;0 (m<sub>1&gt;0</sub>/u)</b>  | 0.003                  | 0.000 – 0.363                |
| <b>N<sub>e</sub> Caballo Moro</b>      | 850                    | 350 – 1,850                  |
| <b>N<sub>e</sub> Surface</b>           | 3,850                  | 2,150 – 6,950                |
| <b>N<sub>e</sub> Ancestral</b>         | 37,950                 | 25,250 – 65,350              |
| <b>t</b>                               | 4,074                  | 1,834 – 10,626               |
| <b>m<sub>s-&gt;c</sub></b>             | 3.0 x 10 <sup>-4</sup> | 0.0 – 8.3 x 10 <sup>-4</sup> |
| <b>m<sub>c-&gt;s</sub></b>             | 1.5 x 10 <sup>-6</sup> | 0.0 – 1.8 x 10 <sup>-4</sup> |

We assumed a mutation rate (u) of 0.0005 and a mean generation time (g) of 3.5 years (2 years for surface fish and 5 years for cavefish). HiPt: the highest value in the histogram of the posterior marginal density. HPD 95%: the lower and upper bound of the estimated 95% highest posterior density (HPD) interval. Effective population size (N<sub>e</sub>) Caballo Moro = q0 / 4u ; N<sub>e</sub> surface = q1 / 4u ; N<sub>e</sub> ancestral = q2 / 4u ; t (divergence time in years) = t0 x g / u ; m<sub>s->c</sub> (migration rate from surface to Caballo Moro) = m0>1 x u ; m<sub>c->s</sub> (migration rate from Caballo Moro to surface) = m1>0 x u. m0>1 and m1>0 are migration rate backward in time, whereas m<sub>s->c</sub> and m<sub>c->s</sub> are migration rate forward in time.

**Figure S6:**

# Subterráneo - Surface

## N3 – S4

Sample size : 21 loci; 40 alleles/locus/population

Command line:

/IMa2 -iinfileN3S4\_n40.u -output\_N3S4\_n40\_m20\_longrun.out -b200000 -l100000 -d100 -m20 -q200 -t4 -c1 -p23567 -r25 -u1 -hfg -hn50 -ha0.999 -hb0.3

### Estimation of demographic parameters with IMA2

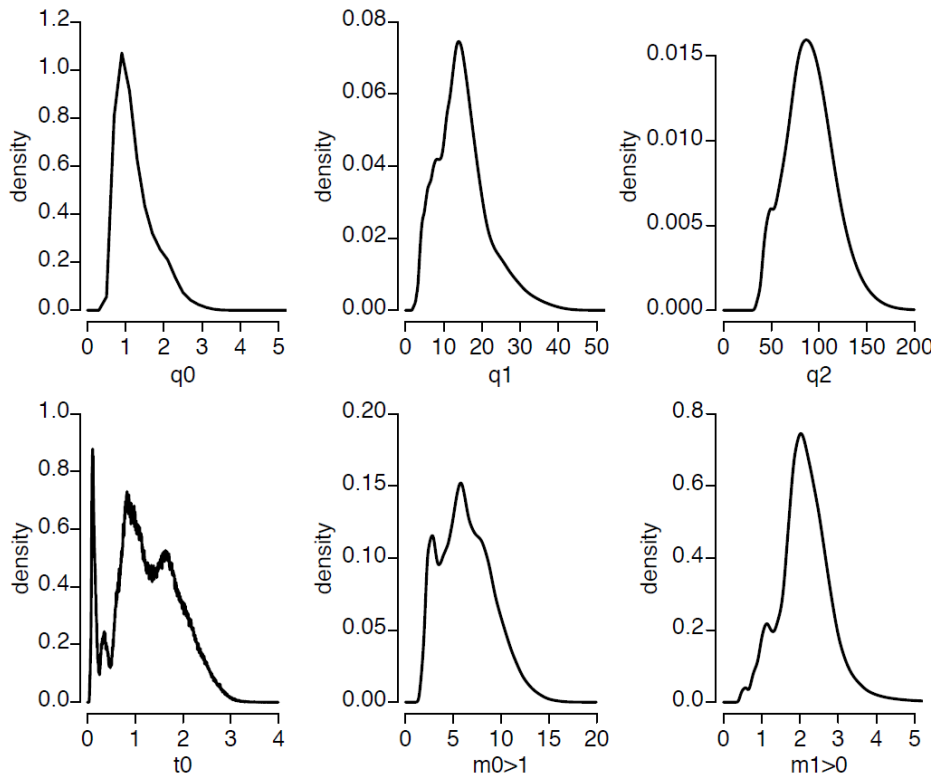

|                                         | HiPt                    | HPD 95%                       |
|-----------------------------------------|-------------------------|-------------------------------|
| <b>q0 (4N<sub>e</sub>u Subterráneo)</b> | 0.900                   | 0.500 – 3.300                 |
| <b>q1 (4N<sub>e</sub>u Surface)</b>     | 13.900                  | 3.100 – 28.700                |
| <b>q2 (4N<sub>e</sub>u Ancestral)</b>   | 86.700                  | 40.700 – 138.300              |
| <b>t0 (tu)</b>                          | 0.110                   | 0.058 – 2.462                 |
| <b>m0&gt;1 (m<sub>0-&gt;1</sub>/u)</b>  | 5.790                   | 1.790 – 11.430                |
| <b>m1&gt;0 (m<sub>1-&gt;0</sub>/u)</b>  | 2.030                   | 0.750 – 3.430                 |
| <b>N<sub>e</sub> Subterráneo</b>        | 450                     | 250 – 1,650                   |
| <b>N<sub>e</sub> Surface</b>            | 6,950                   | 1,550 – 14,350                |
| <b>N<sub>e</sub> ancestral</b>          | 43,350                  | 20,350 – 69,150               |
| <b>t</b>                                | 770                     | 406 – 17,234                  |
| <b>m<sub>s-&gt;c</sub></b>              | 29.0 x 10 <sup>-4</sup> | 9.0 – 57.2 x 10 <sup>-4</sup> |
| <b>m<sub>c-&gt;s</sub></b>              | 10.2 x 10 <sup>-4</sup> | 3.8 – 17.2 x 10 <sup>-4</sup> |

We assumed a mutation rate (u) of 0.0005 and a mean generation time (g) of 3.5 years (2 years for surface fish and 5 years for cavefish). HiPt: the highest value in the histogram of the posterior marginal density. HPD 95%: the lower and upper bound of the estimated 95% highest posterior density (HPD) interval. Effective population size (N<sub>e</sub>) Subterráneo = q0 / 4u ; N<sub>e</sub> surface = q1 / 4u ; N<sub>e</sub> ancestral = q2 / 4u ; t (divergence time in years) = t0 x g / u ; m<sub>s->c</sub> (migration rate from surface to Subterráneo) = m0>1 x u ; m<sub>c->s</sub> (migration rate from Subterráneo to surface) = m1>0 x u. m0>1 and m1>0 are migration rate backward in time, whereas m<sub>s->c</sub> and m<sub>c->s</sub> are migration rate forward in time.

**Figure S7:**

# Curva - Surface

## O6 – S3

Sample size : 14 loci; 20 alleles/locus/population

Command line:

/IMa2 --infileO6S3\_1.u -ooutput\_06S3\_1\_m20\_longrun.out -b200000 -l100000 -d100 -m20 -q200 -t4 -c1 -p23567 -r25 -u1 -hfg -hn50 -ha0.999 -hb0.3

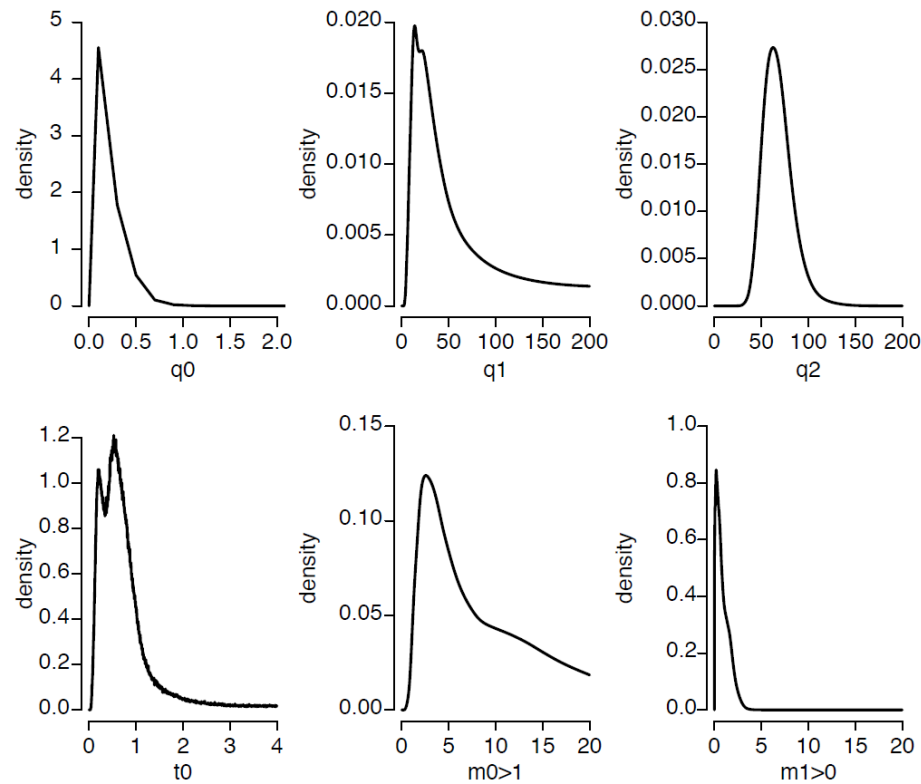

### Estimation of demographic parameters with IMA2

|                                       | HiPt                    | HPD 95%                       |
|---------------------------------------|-------------------------|-------------------------------|
| <b>q0 (4N<sub>e</sub>u Curva)</b>     | 0.100                   | 0.000 – 1.900                 |
| <b>q1 (4N<sub>e</sub>u Surface)</b>   | 13.900                  | 4.300 – 166.300               |
| <b>q2 (4N<sub>e</sub>u Ancestral)</b> | 62.500                  | 39.700 – 99.300               |
| <b>t0 (tu)</b>                        | 0,526                   | 0.050 – 1.982                 |
| <b>m0&gt;1 (m<sub>0&gt;1</sub>/u)</b> | 2.570                   | 0.930 – 17.790                |
| <b>m1&gt;0 (m<sub>1&gt;0</sub>/u)</b> | 0.190                   | 0.000 – 2.230                 |
| <b>N<sub>e</sub> Curva</b>            | 50                      | 0 – 950                       |
| <b>N<sub>e</sub> Surface</b>          | 6,950                   | 2,150 – 83,150                |
| <b>N<sub>e</sub> ancestral</b>        | 31,250                  | 19,850 – 49,650               |
| <b>t</b>                              | 3,682                   | 350 – 13,874                  |
| <b>m<sub>s-&gt;c</sub></b>            | 12.8 x 10 <sup>-4</sup> | 4.7 – 89.0 x 10 <sup>-4</sup> |
| <b>m<sub>c-&gt;s</sub></b>            | 1.0 x 10 <sup>-4</sup>  | 0.0 – 11.2 x 10 <sup>-4</sup> |

We assumed a mutation rate (u) of 0.0005 and a mean generation time (g) of 3.5 years (2 years for surface fish and 5 years for cavefish). HiPt: the highest value in the histogram of the posterior marginal density. HPD 95%: the lower and upper bound of the estimated 95% highest posterior density (HPD) interval. Effective population size (N<sub>e</sub>) Curva = q0 / 4u ; N<sub>e</sub> surface = q1 / 4u ; N<sub>e</sub> ancestral = q2 / 4u ; t (divergence time in years) = t0 x g / u ; m<sub>s->c</sub> (migration rate from surface to Curva) = m0>1 x u ; m<sub>c->s</sub> (migration rate from Curva to surface) = m1>0 x u. m0>1 and m1>0 are migration rate backward in time, whereas m<sub>s->c</sub> and m<sub>c->s</sub> are migration rate forward in time.

**Figure S8:**



# Pachón - Curva

## O1 - O6

Sample size : 14 loci; 20 alleles/locus/population

Command line:

/IMa2 -iinfileO1O6\_0.u -ooutput\_O1O6\_0\_m10\_longrun.out -b200000 -l100000 -d100 -m10 -q200 -t4 -c1 -p23567 -r25 -u1 -hfg -hn50 -ha0.999 -hb0.3

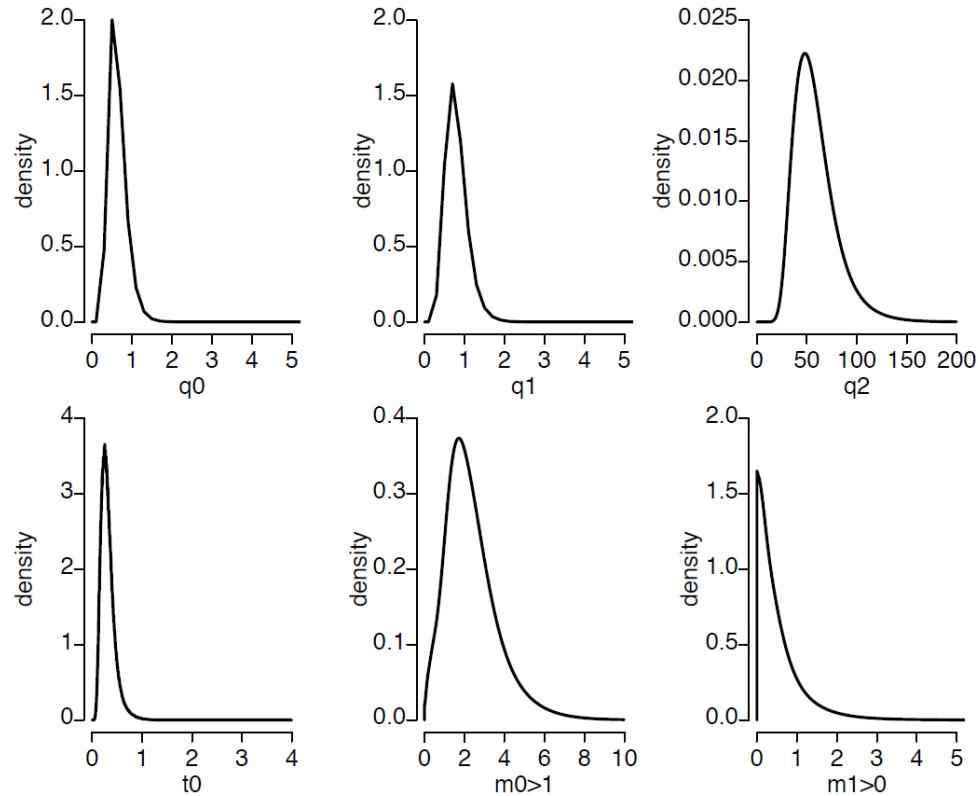

### Estimation of demographic parameters with IMA2

|                                       | HiPt                  | HPD 95%                       |
|---------------------------------------|-----------------------|-------------------------------|
| <b>q0 (4N<sub>e</sub>u Pachón)</b>    | 0.500                 | 0.300 – 2.500                 |
| <b>q1 (4N<sub>e</sub>u Curva)</b>     | 0.700                 | 0.300 – 2.700                 |
| <b>q2 (4N<sub>e</sub>u Ancestral)</b> | 48.100                | 23.900 – 101.500              |
| <b>t0 (tu)</b>                        | 0.254                 | 0.086 – 0.598                 |
| <b>m0&gt;1 (m<sub>0&gt;1</sub>/u)</b> | 1.715                 | 0.105 – 4.905                 |
| <b>m1&gt;0 (m<sub>1&gt;0</sub>/u)</b> | 0.005                 | 0.000 – 1.705                 |
| <b>N<sub>e</sub> Pachón</b>           | 250                   | 150 – 1,250                   |
| <b>N<sub>e</sub> Curva</b>            | 350                   | 150 – 1,350                   |
| <b>N<sub>e</sub> ancestral</b>        | 24,050                | 11,950 – 50,750               |
| <b>t</b>                              | 2,540                 | 860 – 5,980                   |
| <b>m<sub>C-&gt;P</sub></b>            | $8.58 \times 10^{-4}$ | $0.53 - 24,52 \times 10^{-4}$ |
| <b>m<sub>P-&gt;C</sub></b>            | $2.50 \times 10^{-6}$ | $0.00 - 8.53 \times 10^{-4}$  |

We assumed a mutation rate (u) of 0.0005 and a mean generation time (g) of 5 years. HiPt: the highest value in the histogram of the posterior marginal density. HPD 95%: the lower and upper bound of the estimated 95% highest posterior density (HPD) interval. Effective population size (N<sub>e</sub>) Pachón = q0 / 4u ; N<sub>e</sub> Curva = q1 / 4u ; N<sub>e</sub> ancestral = q2 / 4u ; t (divergence time in years) = t0 x g / u ; m<sub>C->P</sub> (migration rate from Curva to Pachón) = m0>1 x u ; m<sub>P->C</sub> (migration rate from Pachón to Curva) = m1>0 x u. m0>1 and m1>0 are migration rate backward in time, whereas m<sub>C->P</sub> and m<sub>P->C</sub> are migration rate forward in time.

**Figure S9:**

Lab populations collected in the wild in 2000

Purchased in 2012

*A. mexicanus* Texas surface fish

*A. mexicanus* Pachón cavefish

*H. anisitsi*

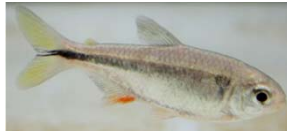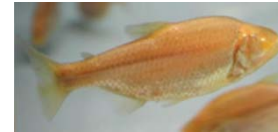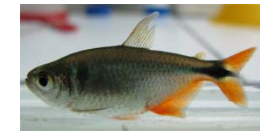

Fifty to 200 embryos/larvae from several independent spawn events and several developmental stages (6 hpf to 15 dpf) were pooled.

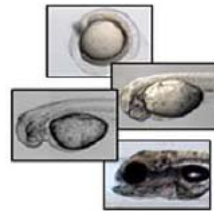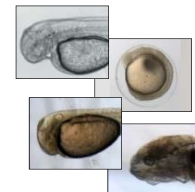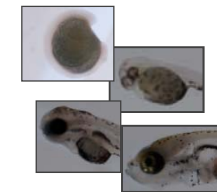

Number of RNA sequences:

Sanger  
454  
Illumina

$1 \cdot 10^5$   
 $1 \cdot 10^6$   
 $250 \cdot 10^6$

$1 \cdot 10^5$   
 $1 \cdot 10^6$   
 $250 \cdot 10^6$

$250 \cdot 10^6$

**Figure S10: Population sampling and RNA sequencing**

Effect of “sequencing depth” threshold, *i.e.* the minimal number of reads in each population.

Blast e-value =  $10^{-5}$

Minor allele frequency : 0.05

Window : 50

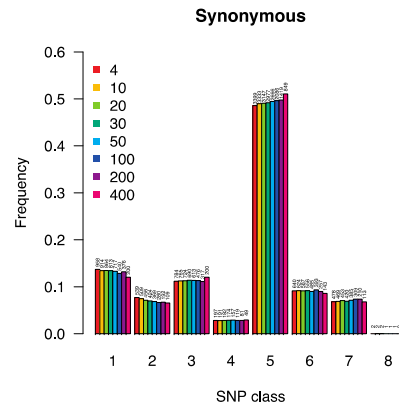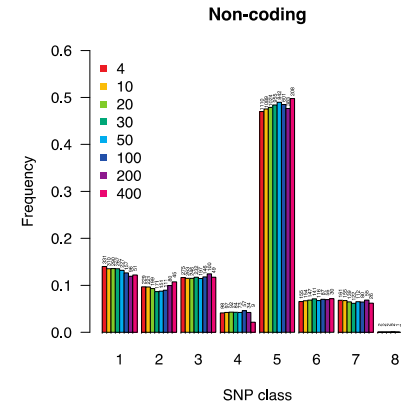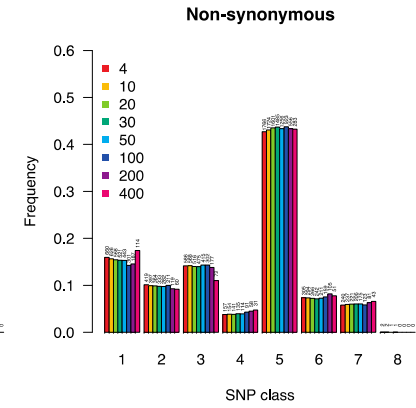

Effect of “sequence conservation” threshold, *i.e.* the blast best hit e-value between the contig and the zebrafish sequence.

Sequencing depth = 100

Minor allele frequency : 0.05

Window : 50

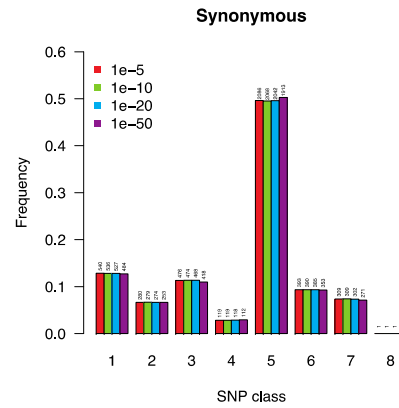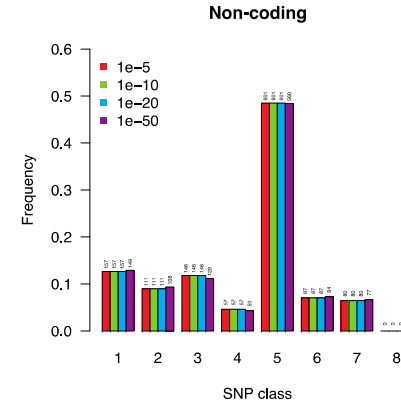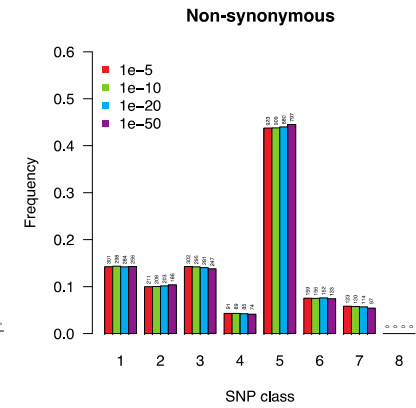

Effect of “SNP isolation” threshold, *i.e.* no other SNP in a window of a given size

Blast e-value =  $10^{-5}$

Sequencing depth = 100

Minor allele frequency : 0.05

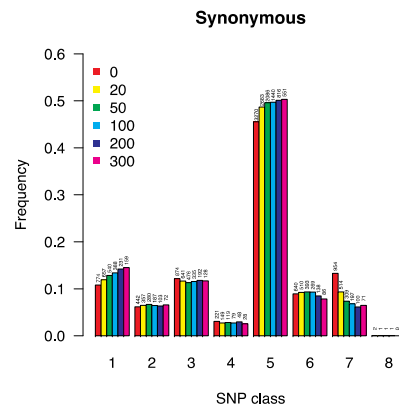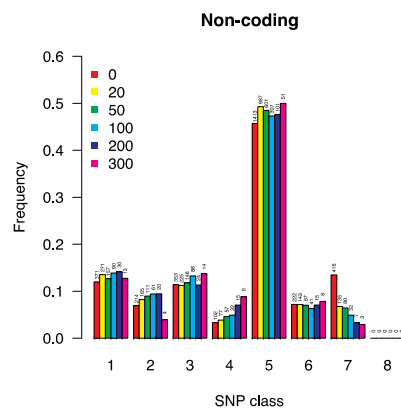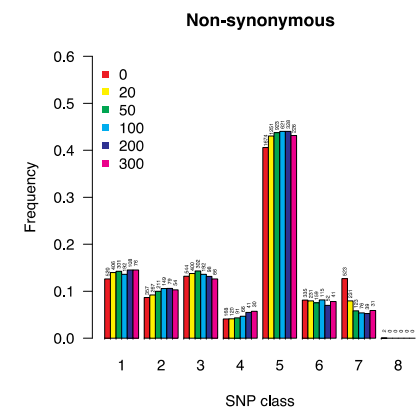

**Figure S11: The effect of different thresholds on the estimation of SNP class frequencies**

# Supplementary tables

Table S1

number of alleles genotyped / locus / locality

|         |              |           | A13e5 | Hc5  | Vf9   | Ra8  | Xa3  | Ib1    | A13f8 | A14d12 | A19c8 | A14d8 | M_f4  | Vf3  | A7c5 |
|---------|--------------|-----------|-------|------|-------|------|------|--------|-------|--------|-------|-------|-------|------|------|
| surface | Guatemala    | <b>S1</b> | 56    | 64   | 56    | 70   | 70   | 72     | 40    | 72     | 60    | 72    | 44    | 82   | 80   |
| surface | Guatemala    | <b>S2</b> | 32    | 54   | 24    | 62   | 68   | 52     | 64    | 74     | 36    | 48    | 24    | 74   | 60   |
| surface | El Abra      | <b>S3</b> | 142   | 166  | 126   | 170  | 180  | 176    | 108   | 212    | 154   | 178   | 102   | 228  | 210  |
| surface | Micos        | <b>S4</b> | 44    | 52   | 28    | 44   | 34   | 58     | 34    | 58     | 40    | 42    | 24    | 56   | 56   |
| cave    | Pachón       | <b>O1</b> | 68    | 82   | 0     | 74   | 86   | 66     | 88    | 88     | 30    | 78    | 38    | 84   | 80   |
| cave    | Yerbaniz     | <b>O2</b> | 16    | 20   | 4     | 22   | 22   | 16     | 22    | 22     | 16    | 20    | 18    | 24   | 20   |
| cave    | Japones      | <b>O3</b> | 16    | 18   | 4     | 14   | 16   | 14     | 18    | 20     | 14    | 20    | 18    | 18   | 20   |
| cave    | Arroyo       | <b>O4</b> | 14    | 22   | 0     | 14   | 20   | 16     | 22    | 24     | 8     | 16    | 10    | 22   | 22   |
| cave    | Tinaja       | <b>O5</b> | 8     | 8    | 0     | 8    | 8    | 4      | 8     | 8      | 4     | 4     | 4     | 8    | 8    |
| cave    | Curva        | <b>O6</b> | 8     | 20   | 0     | 14   | 22   | 6      | 26    | 26     | 0     | 16    | 26    | 18   | 18   |
| cave    | Toro         | <b>O7</b> | 4     | 6    | 0     | 4    | 6    | 6      | 6     | 6      | 4     | 4     | 4     | 6    | 6    |
| cave    | Chica        | <b>O8</b> | 206   | 210  | 206   | 220  | 206  | 180    | 228   | 162    | 196   | 198   | 142   | 218  | 220  |
| cave    | Molino       | <b>N1</b> | 34    | 42   | 26    | 32   | 42   | 36     | 44    | 44     | 38    | 32    | 34    | 44   | 44   |
| cave    | Caballo Moro | <b>N2</b> | 32    | 44   | 34    | 44   | 44   | 26     | 48    | 52     | 46    | 42    | 42    | 50   | 50   |
| cave    | Subterráneo  | <b>N3</b> | 78    | 122  | 106   | 124  | 124  | 52     | 140   | 138    | 54    | 136   | 0     | 134  | 144  |
|         |              |           | A5f9  | A2a7 | a4g11 | a6f1 | wd11 | a12f10 | Lb9   | wc12   | a6h6  | wf6   | A10b5 | vc10 | a8g5 |
| surface | Guatemala    | <b>S1</b> | 84    | 82   | 70    | 68   | 80   | 78     | 82    | 78     | 82    | 74    | 70    | 28   | 58   |
| surface | Guatemala    | <b>S2</b> | 66    | 76   | 68    | 58   | 60   | 56     | 56    | 58     | 46    | 54    | 30    | 32   | 42   |
| surface | El Abra      | <b>S3</b> | 224   | 226  | 202   | 158  | 198  | 208    | 188   | 210    | 194   | 202   | 184   | 66   | 128  |
| surface | Micos        | <b>S4</b> | 58    | 58   | 44    | 54   | 52   | 54     | 48    | 54     | 44    | 56    | 40    | 32   | 40   |
| cave    | Pachón       | <b>O1</b> | 86    | 84   | 86    | 80   | 70   | 82     | 74    | 80     | 54    | 84    | 76    | 74   | 84   |
| cave    | Yerbaniz     | <b>O2</b> | 22    | 22   | 22    | 22   | 22   | 16     | 16    | 16     | 16    | 20    | 22    | 16   | 16   |
| cave    | Japones      | <b>O3</b> | 18    | 20   | 10    | 12   | 12   | 16     | 16    | 16     | 16    | 16    | 10    | 14   | 18   |
| cave    | Arroyo       | <b>O4</b> | 24    | 24   | 16    | 18   | 18   | 20     | 22    | 20     | 22    | 18    | 14    | 22   | 24   |
| cave    | Tinaja       | <b>O5</b> | 8     | 8    | 8     | 8    | 8    | 6      | 8     | 8      | 8     | 8     | 8     | 8    | 8    |
| cave    | Curva        | <b>O6</b> | 26    | 26   | 26    | 22   | 26   | 22     | 26    | 22     | 26    | 18    | 18    | 8    | 14   |
| cave    | Toro         | <b>O7</b> | 6     | 6    | 6     | 6    | 6    | 6      | 6     | 6      | 6     | 4     | 2     | 0    | 2    |
| cave    | Chica        | <b>O8</b> | 234   | 216  | 212   | 216  | 208  | 196    | 216   | 184    | 216   | 232   | 234   | 224  | 232  |
| cave    | Molino       | <b>N1</b> | 44    | 44   | 22    | 30   | 36   | 38     | 42    | 42     | 42    | 44    | 44    | 42   | 42   |
| cave    | Caballo Moro | <b>N2</b> | 44    | 50   | 40    | 38   | 44   | 50     | 52    | 52     | 52    | 50    | 50    | 52   | 52   |
| cave    | Subterráneo  | <b>N3</b> | 138   | 142  | 130   | 128  | 108  | 140    | 136   | 140    | 136   | 140   | 128   | 130  | 140  |

Table S2a:

Classification of polymorphisms in *Astyanax mexicanus* Texas surface vs the Pachón cave populations

|                                             | Class   | Synonymous |       | Non-coding |       | Non-synonymous |       |
|---------------------------------------------|---------|------------|-------|------------|-------|----------------|-------|
|                                             |         | n          | %     | n          | %     | n              | %     |
| <b>Ancestral fixed SF, derived fixed CF</b> | (1)     | 612        | 14.6  | 180        | 14.6  | 343            | 16.3  |
| <b>Ancestral fixed CF, derived fixed SF</b> | (2)     | 351        | 8.4   | 144        | 11.7  | 246            | 11.7  |
| <b>Polymorphism CF, ancestral fixed SF</b>  | (3)     | 434        | 10.3  | 130        | 10.6  | 274            | 13.0  |
| <b>Polymorphism CF, derived fixed SF</b>    | (4)     | 110        | 2.6   | 49         | 4.0   | 81             | 3.8   |
| <b>Polymorphism SF, ancestral fixed CF</b>  | (5)     | 2,062      | 49.1  | 588        | 47.8  | 911            | 43.3  |
| <b>Polymorphism SF, derived fixed CF</b>    | (6)     | 391        | 9.3   | 84         | 6.4   | 155            | 7.4   |
| <b>Shared polymorphism</b>                  | (7)     | 240        | 5.7   | 55         | 4.5   | 96             | 4.6   |
| <b>Divergent</b>                            | (8)     | 0          | 0.0   | 0          | 0.0   | 0              | 0.0   |
| <b>Total</b>                                |         | 4,200      | 100.0 | 1,230      | 100.0 | 2,106          | 100.0 |
| <b>Polymorphism SF</b>                      | (5+6+7) | 2,693      |       | 727        |       | 1,162          |       |
| <b>Polymorphism CF</b>                      | (3+4+7) | 784        |       | 234        |       | 451            |       |
| <b>Ratio SF/CF</b>                          |         | 3.43       |       | 3.11       |       | 2.58           |       |
| <b>Derived and fixed SF</b>                 | (2+4)   | 461        |       | 193        |       | 327            |       |
| <b>Derived and fixed CF</b>                 | (1+6)   | 1,003      |       | 264        |       | 498            |       |
| <b>Ratio CF/SF</b>                          |         | 2.18       |       | 1.37       |       | 1.52           |       |

Thresholds: 100; MAF > 10%; Score Blast < 10<sup>-5</sup>; interval > 50bp (see materials and methods for threshold definitions.)

CF: Cavefish; SF: Surface fish; numbers in brackets are class identifiers described in fig. 4.

Table S2b:

Classification of polymorphisms in *Astyanax mexicanus* Texas surface vs Pachón cave populations

|                                             | Class   | Synonymous |       | Non-coding |       | Non-synonymous |       |
|---------------------------------------------|---------|------------|-------|------------|-------|----------------|-------|
|                                             |         | n          | %     | n          | %     | n              | %     |
| <b>Ancestral fixed SF, derived fixed CF</b> | (1)     | 462        | 11.0  | 123        | 9.9   | 247            | 11.6  |
| <b>Ancestral fixed CF, derived fixed SF</b> | (2)     | 207        | 4.9   | 83         | 6.7   | 173            | 8.1   |
| <b>Polymorphism CF, ancestral fixed SF</b>  | (3)     | 495        | 11.8  | 154        | 12.4  | 317            | 14.9  |
| <b>Polymorphism CF, derived fixed SF</b>    | (4)     | 123        | 2.9   | 57         | 4.6   | 94             | 4.4   |
| <b>Polymorphism SF, ancestral fixed CF</b>  | (5)     | 2,105      | 50.0  | 609        | 49.0  | 935            | 43.8  |
| <b>Polymorphism SF, derived fixed CF</b>    | (6)     | 414        | 9.8   | 100        | 8.0   | 177            | 8.3   |
| <b>Shared polymorphism</b>                  | (7)     | 400        | 9.5   | 117        | 9.4   | 187            | 8.8   |
| <b>Divergent</b>                            | (8)     | 2          | 0.0   | 1          | 0.1   | 4              | 0.2   |
| <b>Total</b>                                |         | 5,387      | 100.0 | 1,244      | 100.0 | 2,134          | 100.0 |
| <b>Polymorphism SF</b>                      | (5+6+7) | 2,919      |       | 826        |       | 1,299          |       |
| <b>Polymorphism CF</b>                      | (3+4+7) | 1,018      |       | 328        |       | 598            |       |
| <b>Ratio SF/CF</b>                          |         | 2.87       |       | 2.52       |       | 2.17           |       |
| <b>Derived and fixed SF</b>                 | (2+4)   | 330        |       | 140        |       | 267            |       |
| <b>Derived and fixed CF</b>                 | (1+6)   | 876        |       | 223        |       | 424            |       |
| <b>Ratio CF/SF</b>                          |         | 2.65       |       | 1.59       |       | 1.59           |       |

Thresholds: 100; MAF > 1%; Score Blast < 10<sup>-5</sup>; interval > 50bp (see materials and methods for threshold definitions).

CF: Cavefish; SF: Surface fish; numbers in brackets are class identifiers described in fig. 4.

Table S3a:

Best score and age of the cavefish population with different sets of demographic parameters.

|        |        | Ne ancestral = 10,000 |        |        |        |              |        |        |        |        |        |       |        |       |        |       |        |       |        |
|--------|--------|-----------------------|--------|--------|--------|--------------|--------|--------|--------|--------|--------|-------|--------|-------|--------|-------|--------|-------|--------|
|        |        | 5,000                 |        |        |        | Ne SF 10,000 |        |        |        | 20,000 |        |       |        |       |        |       |        |       |        |
|        |        | % of migrant fish     |        |        |        |              |        |        |        |        |        |       |        |       |        |       |        |       |        |
|        |        | 1%                    | 0.1%   | 0.01%  | 0%     | 1%           | 0.1%   | 0.01%  | 0%     | 1%     | 0.1%   | 0.01% | 0%     |       |        |       |        |       |        |
| 75     | 0.10   |                       |        |        |        |              |        |        |        |        |        |       |        |       |        |       |        |       |        |
|        | 0.01   |                       |        |        |        |              |        |        |        |        |        |       |        |       |        |       |        |       |        |
|        | 0.001  |                       |        |        |        |              |        |        |        |        |        |       |        |       |        |       |        |       |        |
|        | 0.0001 |                       |        |        |        |              |        |        |        |        |        |       |        |       |        |       |        |       |        |
|        | 0.0    |                       |        |        |        | 15.81        | 1,200  |        |        | 15.81  | 1,000  |       |        | 19.06 | 900    |       |        |       |        |
| 150    | 0.10   | 53.19                 | 73,800 |        |        | 51.19        | 76,300 |        |        | 47.53  | 14,700 |       |        |       |        |       |        |       |        |
|        | 0.01   | 1.63                  | 90,700 |        |        | 1.37         | 72,100 |        |        | 5.14   | 82,500 |       |        |       |        |       |        |       |        |
|        | 0.001  | 9.47                  | 2,300  |        |        | 13.97        | 1,900  |        |        | 14.47  | 54,300 |       |        |       |        |       |        |       |        |
|        | 0.0001 | 12.87                 | 2,200  |        |        | 16.47        | 2,000  |        |        | 15.97  | 1,900  |       |        |       |        |       |        |       |        |
|        | 0.0    | 13.03                 | 2,000  |        |        | 16.77        | 2,300  |        |        | 16.94  | 2,200  |       |        |       |        |       |        |       |        |
| 313    | 0.10   | 94.76                 | 63,600 |        |        | 102.20       | 39,300 |        |        | 93.05  | 47,300 |       |        |       |        |       |        |       |        |
|        | 0.01   | 4.30                  | 90,400 |        |        | 4.48         | 50,100 |        |        | 7.63   | 48,000 |       |        |       |        |       |        |       |        |
|        | 0.001  | 3.95                  | 13,900 |        |        | 8.10         | 37,500 |        |        | 4.95   | 83,500 |       |        |       |        |       |        |       |        |
|        | 0.0001 | 5.81                  | 4,100  |        |        | 10.64        | 4,800  |        |        | 13.76  | 3,800  |       |        |       |        |       |        |       |        |
|        | 0.0    | 5.63                  | 5,300  |        |        | 6.92         | 4,800  |        |        | 12.90  | 4,700  |       |        | 11.99 | 3,800  |       |        |       |        |
| 625    | 0.10   | 118.60                | 89,900 |        |        | 123.54       | 68,000 |        |        | 110.15 | 27,400 |       |        |       |        |       |        |       |        |
|        | 0.01   | 23.69                 | 49,700 |        |        | 24.18        | 23,700 |        |        | 13.41  | 30,200 |       |        |       |        |       |        |       |        |
|        | 0.001  | 2.01                  | 11,600 |        |        | 1.06         | 28,600 |        |        | 3.11   | 74,800 |       |        |       |        |       |        |       |        |
|        | 0.0001 | 1.03                  | 9,300  |        |        | 5.51         | 10,300 |        |        | 10.21  | 9,800  |       |        |       |        |       |        |       |        |
|        | 0.0    | 1.00                  | 11,200 |        |        | 5.28         | 10,200 |        |        | 8.81   | 10,100 |       |        |       |        |       |        |       |        |
| 1,250  | 0.10   | 123.32                | 77,600 | 63.99  | 80,000 | 133.67       | 54,400 | 54.15  | 72,600 | 120.07 | 20,500 | 45.95 | 19,100 |       |        |       |        |       |        |
|        | 0.01   | 55.39                 | 94,600 | 9.24   | 17,200 | 59.80        | 28,100 | 1.27   | 27,100 | 44.52  | 24,800 | 2.03  | 73,200 |       |        |       |        |       |        |
|        | 0.001  | 11.52                 | 19,700 | 5.35   | 17,000 | 0.68         | 21,500 | 1.13   | 21,100 | 2.04   | 51,000 | 4.80  | 21,500 |       |        |       |        |       |        |
|        | 0.0001 | 7.60                  | 16,300 | 6.78   | 15,700 | 1.71         | 20,500 | 1.47   | 21,100 | 3.56   | 22,300 | 3.79  | 18,100 |       |        |       |        |       |        |
|        | 0.0    | 8.14                  | 16,400 | 7.03   | 16,100 | 6.14         | 13,800 | 1.06   | 19,100 | 1.54   | 19,000 | 4.40  | 19,700 | 5.12  | 16,700 |       |        |       |        |
| 2,500  | 0.10   | 128.43                | 64,900 | 94.14  | 91,600 | 137.76       | 8,300  | 76.99  | 95,000 | 123.72 | 25,400 | 68.34 | 23,000 |       |        |       |        |       |        |
|        | 0.01   | 98.60                 | 97,300 | 41.88  | 18,600 | 83.03        | 30,400 | 13.29  | 36,700 | 72.82  | 17,200 | 5.65  | 76,200 |       |        |       |        |       |        |
|        | 0.001  | 46.00                 | 17,600 | 35.05  | 21,900 | 12.06        | 26,700 | 8.09   | 27,900 | 8.72   | 51,000 | 5.35  | 37,100 |       |        |       |        |       |        |
|        | 0.0001 | 30.18                 | 19,300 | 31.41  | 25,000 | 6.82         | 32,600 | 7.22   | 28,100 | 5.34   | 34,200 | 4.11  | 31,000 |       |        |       |        |       |        |
|        | 0.0    |                       |        |        |        | 30.10        | 21,100 |        |        | 8.39   | 30,800 |       |        | 4.70  | 34,300 |       |        |       |        |
| 5,000  | 0.10   | 129.69                | 97,100 | 111.16 | 93,900 | 141.32       | 96,100 | 107.74 | 32,600 | 127.73 | 20,900 | 94.27 | 24,800 |       |        |       |        |       |        |
|        | 0.01   | 83.72                 | 81,800 | 35.92  | 17,500 | 83.72        | 49,700 | 53.69  | 29,600 | 90.50  | 39,900 | 31.37 | 65,400 |       |        |       |        |       |        |
|        | 0.001  | 76.51                 | 15,500 | 67.12  | 28,700 | 41.08        | 40,400 | 27.74  | 49,600 | 23.38  | 85,100 | 13.87 | 65,200 |       |        |       |        |       |        |
|        | 0.0001 | 69.12                 | 22,900 | 68.84  | 33,500 | 27.95        | 42,100 | 29.32  | 54,500 | 12.24  | 66,900 | 13.01 | 50,000 |       |        |       |        |       |        |
|        | 0.0    | 75.10                 | 12,100 | 75.07  | 18,000 | 29.37        | 44,700 | 25.11  | 37,300 | 13.13  | 61,800 | 13.07 | 67,900 |       |        |       |        |       |        |
| 10,000 | 0.10   | 129.75                | 99,700 | 123.88 | 80,800 | 96.26        | 12,300 | 63.98  | 20,300 | 29.21  | 44,300 |       |        | 12.37 | 56,900 |       |        |       |        |
|        | 0.01   | 130.37                | 87,200 | 109.00 | 12,600 | 99.99        | 13,500 | 115.02 | 20,500 | 80.04  | 20,400 | 61.27 | 28,200 | 97.61 | 13,000 | 55.67 | 51,500 | 29.65 | 90,800 |
|        | 0.001  | 104.11                | 9,300  | 98.88  | 17,600 | 102.56       | 13,400 | 79.82  | 38,000 | 53.87  | 39,200 | 58.48 | 48,100 | 53.97 | 42,700 | 34.13 | 97,200 | 31.40 | 94,000 |
|        | 0.0001 | 89.72                 | 14,500 | 94.96  | 9,600  | 82.89        | 14,000 | 56.97  | 39,000 | 58.37  | 45,700 | 55.21 | 29,200 | 33.37 | 84,100 | 31.26 | 78,100 | 31.83 | 96,000 |
|        | 0.0    | 95.54                 | 9,300  | 101.17 | 9,000  | 95.74        | 12,800 | 57.47  | 41,000 | 59.44  | 43,600 | 56.06 | 42,100 | 28.88 | 96,900 | 31.94 | 61,000 | 34.15 | 50,800 |
|        | 0.0    |                       |        |        |        | 96.86        | 12,700 |        |        | 60.38  | 35,700 |       |        | 31.59 | 93,100 |       |        |       |        |

For each simulation, the best score (left value) and the age of the cavefish population (right value) are given. score < 3, green background; 3 < score < 15, orange background; score > 15, red background.

When the percentage of migrants is less than one fish at each migration, the model is equivalent to the model without migration and the cell was colored in grey.

Table S3b:

Best score and age of the cavefish population with different sets of demographic parameters.

Ne ancestral = 20,000

|        |        | 5,000  |        |        |        | Ne SF 10,000<br>% of migrant fish |        |        |        | 20,000 |        |        |        |        |        |        |        |        |        |        |  |
|--------|--------|--------|--------|--------|--------|-----------------------------------|--------|--------|--------|--------|--------|--------|--------|--------|--------|--------|--------|--------|--------|--------|--|
|        |        | 1%     | 0.1%   | 0.01%  | 0%     | 1%                                | 0.1%   | 0.01%  | 0%     | 1%     | 0.1%   | 0.01%  | 0%     |        |        |        |        |        |        |        |  |
| 75     | 0.10   |        |        |        |        |                                   |        |        |        |        |        |        |        |        |        |        |        |        |        |        |  |
|        | 0.01   |        |        |        |        |                                   |        |        |        |        |        |        |        |        |        |        |        |        |        |        |  |
|        | 0.001  |        |        |        |        |                                   |        |        |        |        |        |        |        |        |        |        |        |        |        |        |  |
|        | 0.0001 |        |        |        |        |                                   |        |        |        |        |        |        |        |        |        |        |        |        |        |        |  |
|        | 0.0    |        |        |        |        | 20.39                             | 900    |        |        | 20.27  | 1,000  |        |        | 22.47  | 1,000  |        |        |        |        |        |  |
| 150    | 0.10   | 56.72  | 78,000 |        |        | 59.03                             | 94,600 |        |        | 61.23  | 52,200 |        |        |        |        |        |        |        |        |        |  |
|        | 0.01   | 1.58   | 89,600 |        |        | 3.18                              | 90,100 |        |        | 5.47   | 99,500 |        |        |        |        |        |        |        |        |        |  |
|        | 0.001  | 17.01  | 2,200  |        |        | 17.28                             | 1,900  |        |        | 14.85  | 42,700 |        |        |        |        |        |        |        |        |        |  |
|        | 0.0001 | 15.45  | 1,900  |        |        | 19.77                             | 1,900  |        |        | 21.53  | 1,800  |        |        |        |        |        |        |        |        |        |  |
|        | 0.0    | 15.32  | 2,100  |        |        | 20.55                             | 1,700  |        |        | 19.52  | 2,300  |        |        |        |        |        |        |        |        |        |  |
| 313    | 0.10   | 98.33  | 66,600 |        |        | 110.68                            | 86,300 |        |        | 110.36 | 28,300 |        |        |        |        |        |        |        |        |        |  |
|        | 0.01   | 3.16   | 94,100 |        |        | 6.74                              | 96,400 |        |        | 9.80   | 51,900 |        |        |        |        |        |        |        |        |        |  |
|        | 0.001  | 8.16   | 5,500  |        |        | 10.89                             | 34,600 |        |        | 4.87   | 97,100 |        |        |        |        |        |        |        |        |        |  |
|        | 0.0001 | 7.82   | 4,800  |        |        | 16.63                             | 4,600  |        |        | 17.98  | 3,700  |        |        |        |        |        |        |        |        |        |  |
|        | 0.0    | 8.98   | 4,400  |        |        | 12.78                             | 5,000  |        |        | 17.48  | 4,300  |        |        |        |        |        |        |        |        |        |  |
| 625    | 0.10   | 116.35 | 99,300 |        |        | 128.52                            | 93,000 |        |        | 128.01 | 15,600 |        |        |        |        |        |        |        |        |        |  |
|        | 0.01   | 29.57  | 92,000 |        |        | 24.23                             | 70,800 |        |        | 26.98  | 91,400 |        |        |        |        |        |        |        |        |        |  |
|        | 0.001  | 3.71   | 10,100 |        |        | 3.14                              | 27,000 |        |        | 1.50   | 80,900 |        |        |        |        |        |        |        |        |        |  |
|        | 0.0001 | 3.23   | 9,900  |        |        | 6.18                              | 9,000  |        |        | 9.93   | 8,900  |        |        |        |        |        |        |        |        |        |  |
|        | 0.0    | 5.72   | 10,100 |        |        | 7.58                              | 9,500  |        |        | 11.73  | 8,700  |        |        |        |        |        |        |        |        |        |  |
| 1,250  | 0.10   | 130.78 | 99,300 | 87.63  | 98,200 | 144.17                            | 98,600 | 60.04  | 58,000 | 140.36 | 87,700 | 57.64  | 70,200 |        |        |        |        |        |        |        |  |
|        | 0.01   | 36.89  | 23,700 | 44.96  | 17,900 | 63.25                             | 98,500 | 2.54   | 24,600 | 53.67  | 28,900 | 6.28   | 54,200 |        |        |        |        |        |        |        |  |
|        | 0.001  | 14.01  | 13,100 | 11.95  | 15,300 | 2.90                              | 25,400 | 2.11   | 19,400 | 0.81   | 38,600 | 5.45   | 19,100 |        |        |        |        |        |        |        |  |
|        | 0.0001 | 11.11  | 14,600 | 11.50  | 14,200 | 1.35                              | 18,900 | 3.24   | 20,300 | 4.39   | 23,000 | 5.02   | 17,200 |        |        |        |        |        |        |        |  |
|        | 0.0    | 10.53  | 13,400 | 11.89  | 14,000 | 1.63                              | 18,900 | 1.74   | 17,900 | 5.31   | 20,500 | 4.62   | 20,000 |        |        |        |        |        |        |        |  |
| 2,500  | 0.10   | 133.00 | 94,800 | 105.77 | 73,900 | 157.76                            | 94,700 | 88.14  | 80,700 | 147.32 | 90,900 | 86.35  | 76,500 |        |        |        |        |        |        |        |  |
|        | 0.01   | 101.60 | 81,800 | 56.16  | 16,100 | 95.49                             | 97,900 | 18.84  | 37,800 | 79.54  | 61,600 | 4.30   | 51,200 |        |        |        |        |        |        |        |  |
|        | 0.001  | 51.63  | 16,300 | 38.42  | 19,300 | 24.34                             | 28,600 | 9.30   | 29,000 | 4.99   | 60,800 | 1.48   | 37,600 |        |        |        |        |        |        |        |  |
|        | 0.0001 | 42.88  | 21,100 | 45.48  | 20,600 | 7.23                              | 29,700 | 6.69   | 29,900 | 1.49   | 38,400 | 1.61   | 38,300 |        |        |        |        |        |        |        |  |
|        | 0.0    |        |        |        |        | 39.55                             | 20,600 |        |        | 8.13   | 29,200 |        |        | 1.73   | 33,500 |        |        |        |        |        |  |
| 5,000  | 0.10   | 136.44 | 88,200 | 117.40 | 99,600 | 150.63                            | 76,500 | 119.71 | 99,700 | 146.97 | 93,900 | 114.89 | 22,200 |        |        |        |        |        |        |        |  |
|        | 0.01   | 424.11 | 83,400 | 105.31 | 13,900 | 117.80                            | 74,100 | 57.54  | 32,500 | 113.56 | 66,700 | 34.72  | 89,500 |        |        |        |        |        |        |        |  |
|        | 0.001  | 101.21 | 10,600 | 90.36  | 22,300 | 57.12                             | 43,100 | 31.45  | 45,100 | 31.00  | 59,900 | 7.93   | 67,000 |        |        |        |        |        |        |        |  |
|        | 0.0001 | 80.47  | 15,900 | 87.95  | 13,700 | 37.59                             | 34,500 | 32.99  | 46,200 | 9.23   | 89,200 | 8.41   | 56,200 |        |        |        |        |        |        |        |  |
|        | 0.0    | 89.50  | 27,200 | 92.71  | 16,300 | 32.21                             | 45,200 | 31.99  | 44,300 | 7.69   | 66,800 | 7.49   | 62,100 |        |        |        |        |        |        |        |  |
| 10,000 | 0.10   | 136.69 | 91,500 | 130.94 | 92,300 | 119.40                            | 13,800 |        |        | 84.13  | 14,900 |        |        | 6.78   | 57,000 |        |        |        |        |        |  |
|        | 0.01   | 131.75 | 94,000 | 121.94 | 7,500  | 122.98                            | 12,800 | 148.03 | 90,200 | 124.50 | 88,100 | 68.76  | 35,100 | 152.48 | 20,300 | 137.31 | 95,600 | 26.73  | 83,600 |        |  |
|        | 0.001  | 126.12 | 9,800  | 118.82 | 12,700 | 119.23                            | 14,600 | 124.62 | 96,000 | 97.47  | 28,900 | 73.38  | 66,000 | 124.49 | 62,300 | 65.85  | 57,200 | 29.74  | 83,200 |        |  |
|        | 0.0001 | 122.93 | 8,400  | 118.28 | 13,300 | 117.15                            | 7,600  | 93.29  | 25,900 | 78.34  | 59,900 | 74.66  | 44,300 | 69.36  | 57,900 | 32.83  | 76,400 | 29.89  | 82,100 |        |  |
|        | 0.0    | 120.00 | 13,800 | 124.57 | 10,300 | 118.15                            | 9,600  | 73.06  | 45,400 | 74.58  | 81,100 | 68.74  | 42,100 | 33.29  | 95,100 | 32.84  | 96,700 | 29.91  | 92,300 |        |  |
|        |        |        |        |        | 120.72 | 12,000                            |        |        | 74.51  | 42,000 | 72.85  | 58,400 | 68.20  | 61,000 | 31.85  | 92,700 | 27.34  | 83,200 | 28.45  | 89,000 |  |
|        |        |        |        |        |        |                                   |        |        |        | 74.07  | 41,700 |        |        |        |        |        |        | 29.49  | 86,200 |        |  |

For each simulation, the best score (left value) and the age of the cavefish population (right value) are given.

score < 3, green background; 3 < score < 15, orange background; score > 15, red background.

When the percentage of migrants is less than one fish at each migration, the model is equivalent to the model without migration and the cell was colored in grey.



Table S3c:

Best score and age of the cavefish population with different sets of demographic parameters.

Ne ancestral = 50,000

|        |        | 5,000             |        |        |        | Ne SF 10,000      |        |        |        | 20,000            |        |        |        |        |        |        |        |       |        |
|--------|--------|-------------------|--------|--------|--------|-------------------|--------|--------|--------|-------------------|--------|--------|--------|--------|--------|--------|--------|-------|--------|
|        |        | % of migrant fish |        |        |        | % of migrant fish |        |        |        | % of migrant fish |        |        |        |        |        |        |        |       |        |
|        |        | 1%                | 0.1%   | 0.01%  | 0%     | 1%                | 0.1%   | 0.01%  | 0%     | 1%                | 0.1%   | 0.01%  | 0%     |        |        |        |        |       |        |
| 75     | 0.10   |                   |        |        |        |                   |        |        |        |                   |        |        |        |        |        |        |        |       |        |
|        | 0.01   |                   |        |        |        |                   |        |        |        |                   |        |        |        |        |        |        |        |       |        |
|        | 0.001  |                   |        |        |        |                   |        |        |        |                   |        |        |        |        |        |        |        |       |        |
|        | 0.0001 |                   |        |        |        |                   |        |        |        |                   |        |        |        |        |        |        |        |       |        |
|        | 0.0    |                   |        |        | 20.21  | 900               |        |        |        |                   | 23.38  | 900    |        | 21.20  | 900    |        |        |       |        |
| 150    | 0.10   | 54.47             | 95,300 |        |        | 73.29             | 95,000 |        |        |                   |        | 75.05  | 2,500  |        |        |        |        |       |        |
|        | 0.01   | 2.33              | 92,100 |        |        | 8.47              | 98,400 |        |        |                   |        | 17.83  | 78,400 |        |        |        |        |       |        |
|        | 0.001  | 15.27             | 1,900  |        |        | 19.39             | 1,900  |        |        |                   |        | 20.23  | 2,200  |        |        |        |        |       |        |
|        | 0.0001 | 16.63             | 2,100  |        |        | 19.06             | 1,800  |        |        |                   |        | 21.12  | 2,200  |        |        |        |        |       |        |
|        | 0.0    | 16.59             | 2,100  |        |        | 19.71             | 1,900  |        |        |                   |        | 21.63  | 1,900  |        |        |        |        |       |        |
| 313    | 0.10   | 193.91            | 81,400 |        |        | 128.97            | 96,400 |        |        |                   |        | 124.06 | 3,900  |        |        |        |        |       |        |
|        | 0.01   | 5.58              | 97,100 |        |        | 11.80             | 82,100 |        |        |                   |        | 18.27  | 30,000 |        |        |        |        |       |        |
|        | 0.001  | 11.70             | 5,600  |        |        | 14.58             | 29,800 |        |        |                   |        | 11.74  | 64,800 |        |        |        |        |       |        |
|        | 0.0001 | 11.93             | 5,000  |        |        | 17.34             | 4,100  |        |        |                   |        | 18.39  | 4,400  |        |        |        |        |       |        |
|        | 0.0    | 11.58             | 4,100  |        |        | 13.58             | 3,000  |        |        |                   |        | 15.24  | 4,200  |        |        |        |        |       |        |
| 625    | 0.10   | 126.61            | 99,500 |        |        | 125.84            | 900    |        |        |                   |        | 145.80 | 2,400  |        |        |        |        |       |        |
|        | 0.01   | 29.82             | 86,600 |        |        | 34.06             | 80,900 |        |        |                   |        | 33.71  | 86,700 |        |        |        |        |       |        |
|        | 0.001  | 8.95              | 11,500 |        |        | 7.09              | 17,300 |        |        |                   |        | 5.95   | 49,300 |        |        |        |        |       |        |
|        | 0.0001 | 6.58              | 9,000  |        |        | 10.46             | 8,900  |        |        |                   |        | 14.70  | 9,500  |        |        |        |        |       |        |
|        | 0.0    | 6.39              | 9,200  |        |        | 9.87              | 9,700  |        |        |                   |        | 13.64  | 8,300  |        |        |        |        |       |        |
| 1,250  | 0.10   | 128.07            | 95,600 | 78.10  | 98,300 | 154.06            | 98,700 | 71.01  | 86,700 |                   |        | 155.98 | 1,900  | 75.47  | 82,900 |        |        |       |        |
|        | 0.01   | 75.38             | 97,200 | 20.85  | 16,700 | 67.07             | 90,800 | 6.71   | 27,800 |                   |        | 70.85  | 92,800 | 3.85   | 49,500 |        |        |       |        |
|        | 0.001  | 26.42             | 18,300 | 16.19  | 14,000 | 9.25              | 28,600 | 4.46   | 17,800 |                   |        | 3.98   | 42,400 | 8.41   | 21,300 |        |        |       |        |
|        | 0.0001 | 18.46             | 15,800 | 16.02  | 14,100 | 4.94              | 19,800 | 5.54   | 17,300 |                   |        | 8.12   | 25,800 | 7.38   | 20,600 |        |        |       |        |
|        | 0.0    | 15.81             | 15,600 | 15.94  | 15,000 | 4.89              | 17,600 | 5.61   | 19,100 |                   |        | 7.24   | 18,700 | 8.42   | 17,600 |        |        |       |        |
| 2,500  | 0.10   | 137.62            | 88,900 | 108.57 | 97,800 | 161.09            | 300    | 110.18 | 95,300 |                   |        | 161.18 | 1,100  | 107.18 | 12,000 |        |        |       |        |
|        | 0.01   | 111.66            | 96,900 | 74.49  | 16,700 | 116.81            | 99,200 | 26.03  | 26,800 |                   |        | 112.16 | 30,400 | 8.14   | 60,700 |        |        |       |        |
|        | 0.001  | 69.78             | 14,500 | 55.17  | 20,500 | 28.29             | 36,500 | 13.03  | 28,300 |                   |        | 4.52   | 52,000 | 2.45   | 38,100 |        |        |       |        |
|        | 0.0001 | 54.78             | 21,200 | 51.95  | 18,600 | 13.41             | 31,000 | 12.52  | 29,700 |                   |        | 2.46   | 38,500 | 3.04   | 36,000 |        |        |       |        |
|        | 0.0    |                   |        |        |        | 52.71             | 20,100 |        |        |                   |        | 12.30  | 27,700 |        | 2.91   | 37,500 |        |       |        |
| 5,000  | 0.10   | 141.77            | 85,600 | 131.81 | 94,500 | 160.27            | 92,000 | 135.08 | 87,300 |                   |        | 164.31 | 300    | 140.52 | 7,100  |        |        |       |        |
|        | 0.01   | 123.05            | 97,500 | 123.23 | 9,800  | 138.39            | 99,600 | 83.45  | 29,400 |                   |        | 137.45 | 15,900 | 47.83  | 61,400 |        |        |       |        |
|        | 0.001  | 124.25            | 9,000  | 108.76 | 15,000 | 74.78             | 23,800 | 48.73  | 40,600 |                   |        | 42.52  | 66,400 | 12.25  | 69,000 |        |        |       |        |
|        | 0.0001 | 107.21            | 11,700 | 104.53 | 16,700 | 47.84             | 38,900 | 42.85  | 42,000 |                   |        | 11.20  | 62,500 | 8.92   | 65,200 |        |        |       |        |
|        | 0.0    | 109.24            | 10,500 | 108.51 | 11,600 | 46.24             | 34,400 | 46.17  | 46,200 |                   |        | 9.62   | 65,400 | 9.83   | 56,400 |        |        |       |        |
| 10,000 | 0.10   | 138.94            | 99,000 | 139.14 | 98,100 | 135.90            | 9,900  | 105.16 | 15,100 |                   |        | 143.42 | 37,500 |        | 8.05   | 63,400 |        |       |        |
|        | 0.01   | 143.98            | 98,500 | 139.04 | 9,200  | 131.51            | 8,700  | 165.52 | 100    | 149.29            | 98,000 | 93.94  | 27,800 | 169.33 | 1,600  | 152.84 | 8,400  | 97.33 | 80,600 |
|        | 0.001  | 140.97            | 7,000  | 136.75 | 6,400  | 133.83            | 10,200 | 126.97 | 97,400 | 117.59            | 16,600 | 97.00  | 51,800 | 151.68 | 6,500  | 90.36  | 45,200 | 36.62 | 93,900 |
|        | 0.0001 | 136.54            | 8,300  | 132.85 | 7,300  | 137.88            | 9,000  | 121.34 | 14,800 | 97.46             | 28,400 | 93.32  | 30,700 | 85.17  | 49,500 | 42.27  | 74,400 | 36.78 | 86,700 |
|        | 0.0    | 135.45            | 8,900  | 132.46 | 7,600  | 137.88            | 9,600  | 94.06  | 32,300 | 93.52             | 33,800 | 94.41  | 39,700 | 36.57  | 89,900 | 36.80  | 80,500 | 35.23 | 84,800 |
|        | 0.0    |                   |        |        |        | 133.05            | 8,300  |        |        |                   |        | 97.90  | 38,400 |        |        | 39.34  | 91,700 |       |        |

For each simulation, the best score (left value) and the age of the cavefish population (right value) are given.

score < 3, green background; 3 < score < 15, orange background; score > 15, red background.

When the percentage of migrants is less than one fish at each migration, the model is equivalent to the model without migration and the cell was colored in grey.

Table S3d:

Best score and age of the cavefish population with different sets of demographic parameters.

Ne ancestral = 100,000

|        |         | Ne SF             |        |        |        |        |        |        |        |        |        |        |        |        |        |        |        |
|--------|---------|-------------------|--------|--------|--------|--------|--------|--------|--------|--------|--------|--------|--------|--------|--------|--------|--------|
|        |         | 5,000             |        |        |        | 10,000 |        |        |        | 20,000 |        |        |        |        |        |        |        |
|        |         | % of migrant fish |        |        |        |        |        |        |        |        |        |        |        |        |        |        |        |
|        |         | 1%                | 0.1%   | 0.01%  | 0%     | 1%     | 0.1%   | 0.01%  | 0%     | 1%     | 0.1%   | 0.01%  | 0%     |        |        |        |        |
| 75     | 0.10    |                   |        |        |        |        |        |        |        |        |        |        |        |        |        |        |        |
|        | 0.01    |                   |        |        |        |        |        |        |        |        |        |        |        |        |        |        |        |
|        | 0.001   |                   |        |        |        |        |        |        |        |        |        |        |        |        |        |        |        |
|        | 0.0001  |                   |        |        |        |        |        |        |        |        |        |        |        |        |        |        |        |
|        | 0.00001 |                   |        |        |        |        |        |        |        |        |        |        |        |        |        |        |        |
|        | 0.0     |                   |        |        |        | 20.76  | 900    |        |        |        | 22.42  | 900    |        |        | 23.50  | 900    |        |
| 150    | 0.10    | 59.65             | 99.700 |        |        | 79.90  | 1,400  |        |        |        |        |        | 75.38  | 2,200  |        |        |        |
|        | 0.01    | 8.43              | 97.100 |        |        | 17.23  | 95.900 |        |        |        |        |        | 23.03  | 23,400 |        |        |        |
|        | 0.010   | 13.35             | 1,900  |        |        | 19.83  | 2,000  |        |        |        |        |        | 22.00  | 2,000  |        |        |        |
|        | 0.0010  | 16.58             | 2,100  |        |        | 19.83  | 1,800  |        |        |        |        |        | 20.83  | 2,100  |        |        |        |
|        | 0.00010 | 17.87             | 2,100  |        |        | 19.95  | 1,800  |        |        |        |        |        | 21.34  | 1,800  |        |        |        |
|        | 0.0     |                   |        |        |        | 17.76  | 1,900  |        |        |        | 19.76  | 2,100  |        |        | 21.46  | 1,800  |        |
| 313    | 0.10    | 102.85            | 98,400 |        |        | 131.45 | 2,200  |        |        |        |        |        | 129.33 | 2,700  |        |        |        |
|        | 0.01    | 7.89              | 96,900 |        |        | 18.76  | 95,700 |        |        |        |        |        | 22.03  | 8,200  |        |        |        |
|        | 0.010   | 12.32             | 5,500  |        |        | 15.65  | 5,600  |        |        |        |        |        | 15.96  | 38,300 |        |        |        |
|        | 0.0010  | 12.28             | 4,600  |        |        | 16.88  | 4,700  |        |        |        |        |        | 19.83  | 4,200  |        |        |        |
|        | 0.00010 | 12.34             | 4,500  |        |        | 16.96  | 4,200  |        |        |        |        |        | 17.46  | 70,300 |        |        |        |
|        | 0.0     |                   |        |        |        | 12.11  | 4,600  |        |        |        | 15.30  | 4,600  |        |        | 20.00  | 3,900  |        |
| 625    | 0.10    | 125.84            | 97,300 |        |        | 152.49 | 1,100  |        |        |        |        |        | 147.10 | 1,800  |        |        |        |
|        | 0.01    | 29.81             | 95,300 |        |        | 42.23  | 82,300 |        |        |        |        |        | 36.50  | 10,300 |        |        |        |
|        | 0.010   | 8.62              | 9,500  |        |        | 9.62   | 32,600 |        |        |        |        |        | 12.46  | 70,300 |        |        |        |
|        | 0.0010  | 7.66              | 8,700  |        |        | 11.74  | 10,400 |        |        |        |        |        | 15.64  | 8,100  |        |        |        |
|        | 0.00010 | 8.79              | 9,200  |        |        | 10.66  | 9,600  |        |        |        |        |        | 15.80  | 7,600  |        |        |        |
|        | 0.0     |                   |        |        |        | 8.64   | 8,700  |        |        |        | 11.42  | 9,600  |        |        | 14.97  | 8,900  |        |
| 1,250  | 0.10    | 134.35            | 95,900 | 85.30  | 99,900 | 161.50 | 400    | 79.23  | 98,600 |        |        |        | 161.63 | 700    | 84.25  | 11,600 |        |
|        | 0.01    | 36.15             | 91,500 | 25.25  | 15,700 | 66.53  | 10,200 | 8.57   | 20,300 |        |        |        | 66.22  | 26,300 | 7.94   | 32,500 |        |
|        | 0.010   | 23.26             | 13,100 | 19.29  | 13,200 | 11.10  | 23,400 | 7.17   | 17,300 |        |        |        | 6.91   | 43,100 | 9.43   | 19,500 |        |
|        | 0.0010  | 18.42             | 14,100 | 18.49  | 13,700 | 7.08   | 18,300 | 7.05   | 17,000 |        |        |        | 11.42  | 18,100 | 10.16  | 16,300 |        |
|        | 0.00010 | 18.88             | 13,700 | 17.88  | 14,100 | 6.97   | 17,400 | 6.94   | 17,100 |        |        |        | 9.38   | 17,500 | 10.30  | 16,700 |        |
|        | 0.0     |                   |        |        |        | 18.41  | 13,600 |        |        |        | 7.21   | 18,600 |        |        | 10.32  | 18,600 |        |
| 2,500  | 0.10    | 140.12            | 96,600 | 126.78 | 99,600 | 168.91 | 400    | 126.30 | 7,100  |        |        |        | 163.56 | 1,100  | 122.14 | 7,800  |        |
|        | 0.01    | 117.38            | 94,800 | 75.30  | 13,600 | 132.62 | 8,800  | 33.71  | 30,200 |        |        |        | 120.50 | 10,400 | 11.60  | 47,400 |        |
|        | 0.010   | 79.15             | 17,400 | 61.05  | 19,500 | 33.03  | 31,500 | 17.41  | 29,300 |        |        |        | 9.24   | 41,700 | 5.14   | 38,000 |        |
|        | 0.0010  | 57.99             | 17,300 | 58.02  | 21,300 | 16.23  | 29,500 | 15.17  | 29,000 |        |        |        | 4.61   | 38,700 | 5.19   | 34,600 |        |
|        | 0.00010 |                   |        |        |        |        |        |        |        |        |        |        |        |        |        |        |        |
|        | 0.0     |                   |        |        |        | 59.20  | 19,200 |        |        |        | 16.37  | 27,700 |        |        | 5.02   | 36,100 |        |
| 5,000  | 0.10    | 146.85            | 98,100 | 135.37 | 95,500 | 170.44 | 200    | 152.61 | 4,800  |        |        |        | 167.40 | 1,600  | 148.32 | 6,000  |        |
|        | 0.01    | 149.59            | 96,200 | 127.95 | 7,100  | 154.77 | 8,400  | 84.58  | 20,100 |        |        |        | 146.33 | 8,200  | 57.65  | 46,900 |        |
|        | 0.010   | 132.81            | 7,500  | 115.37 | 12,500 | 96.46  | 32,500 | 56.52  | 44,700 |        |        |        | 45.53  | 73,400 | 16.39  | 63,500 |        |
|        | 0.0010  | 119.10            | 9,600  | 111.55 | 14,400 | 53.32  | 40,000 | 54.84  | 40,800 |        |        |        | 16.23  | 61,800 | 13.23  | 60,800 |        |
|        | 0.00010 | 116.89            | 12,900 | 116.57 | 15,700 | 51.84  | 42,900 | 51.58  | 38,600 |        |        |        | 13.49  | 57,600 | 13.16  | 58,700 |        |
|        | 0.0     |                   |        |        |        | 114.74 | 10,600 |        |        |        | 54.03  | 42,200 |        |        | 13.21  | 60,300 |        |
| 10,000 | 0.10    | 149.54            | 96,200 | 152.75 | 93,500 | 171.25 | 400    | 161.04 | 3,400  | 109.11 | 30,400 |        |        | 170.03 | 0      | 157.85 | 5,800  |
|        | 0.01    | 150.84            | 98,700 | 148.10 | 7,800  | 160.53 | 2,700  | 128.97 | 15,300 | 107.31 | 29,500 |        |        | 157.54 | 5,900  | 101.47 | 40,300 |
|        | 0.010   | 143.42            | 5,500  | 142.87 | 6,700  | 129.57 | 21,000 | 113.11 | 23,200 | 105.76 | 33,300 |        |        | 100.48 | 40,600 | 53.09  | 90,900 |
|        | 0.0010  | 123.03            | 6,600  | 142.16 | 8,700  | 108.38 | 32,100 | 109.23 | 26,300 | 106.34 | 31,600 |        |        | 50.80  | 71,400 | 47.90  | 92,000 |
|        | 0.00010 | 123.03            | 6,600  | 142.16 | 8,700  | 107.77 | 32,100 | 109.31 | 31,100 | 106.74 | 29,900 |        |        | 47.97  | 88,100 | 46.00  | 79,600 |
|        | 0.0     |                   |        |        |        | 143.19 | 7,800  |        |        |        | 107.89 | 39,300 |        |        | 47.26  | 81,600 |        |

For each simulation, the best score (left value) and the age of the cavefish population (right value) are given.

score < 3, green background; 3 < score < 15, orange background; score > 15, red background.

When the percentage of migrants is less than one fish at each migration, the model is equivalent to the model without migration and the cell was colored in grey.
